# Supplementary material for: Randomised, double-blind, placebo-controlled, phase 2, superiority trial to demonstrate the effectiveness of faecal microbiota transplantation for selective intestinal decolonisation of patients colonised by carbapenemase-producing Klebsiella pneumoniae (KAPEDIS)
Source: PubMed Central journal article supplement — BMJ Open. 2022 Apr 6;12(4):e058124. doi: 10.1136/bmjopen-2021-058124 (PMC8987760; doi:10.1136/bmjopen-2021-058124), 2022-04-06
Supplement: bmjopen-2021-058124.draft_revisions.pdf [file bmjopen-2021-058124.draft_revisions.pdf]

# BMJ Open

BMJ Open is committed to open peer review. As part of this commitment we make the peer review history of every article we publish publicly available.

When an article is published we post the peer reviewers' comments and the authors' responses online. We also post the versions of the paper that were used during peer review. These are the versions that the peer review comments apply to.

The versions of the paper that follow are the versions that were submitted during the peer review process. They are not the versions of record or the final published versions. They should not be cited or distributed as the published version of this manuscript.

BMJ Open is an open access journal and the full, final, typeset and author-corrected version of record of the manuscript is available on our site with no access controls, subscription charges or pay-per-view fees (<http://bmjopen.bmj.com>).

If you have any questions on BMJ Open's open peer review process please email [info.bmjopen@bmj.com](mailto:info.bmjopen@bmj.com)

# BMJ Open

**Efficacy and safety of fecal microbiota transplantation against placebo for Selective Intestinal Decolonization of patients colonized by KPC-producing *Klebsiella pneumoniae* (KAPEDIS study): Study protocol for a randomized, double-blind, placebo-controlled, phase 2, superiority clinical trial.**

|                               |                                                                                                                                                                                                                                                                                                                                                                                                                                                                                                                                                                                                                                |
|-------------------------------|--------------------------------------------------------------------------------------------------------------------------------------------------------------------------------------------------------------------------------------------------------------------------------------------------------------------------------------------------------------------------------------------------------------------------------------------------------------------------------------------------------------------------------------------------------------------------------------------------------------------------------|
| Journal:                      | <i>BMJ Open</i>                                                                                                                                                                                                                                                                                                                                                                                                                                                                                                                                                                                                                |
| Manuscript ID                 | bmjopen-2021-058124                                                                                                                                                                                                                                                                                                                                                                                                                                                                                                                                                                                                            |
| Article Type:                 | Protocol                                                                                                                                                                                                                                                                                                                                                                                                                                                                                                                                                                                                                       |
| Date Submitted by the Author: | 07-Oct-2021                                                                                                                                                                                                                                                                                                                                                                                                                                                                                                                                                                                                                    |
| Complete List of Authors:     | Pérez-Nadales, Elena; Maimonides Institute for Biomedical Research of Cordoba<br>Cano, Ángela; Reina Sofia University Hospital<br>Recio, Manuel; Reina Sofia University Hospital<br>Artacho, María José; Santa Ana Hospital Motril<br>Guzmán-Puche, Julia; Reina Sofia University Hospital<br>Doblas, Antonio; Reina Sofia University Hospital<br>Vidal, Elisa; Reina Sofia University Hospital<br>Natera, Clara; Reina Sofia University Hospital<br>Martínez-Martínez, Luis; Reina Sofia University Hospital<br>Torre-Cisneros, Julian; Reina Sofia University Hospital<br>Castón, Juan José; Reina Sofia University Hospital |
| Keywords:                     | INFECTIOUS DISEASES, Infection control < INFECTIOUS DISEASES, MICROBIOLOGY                                                                                                                                                                                                                                                                                                                                                                                                                                                                                                                                                     |
|                               |                                                                                                                                                                                                                                                                                                                                                                                                                                                                                                                                                                                                                                |

SCHOLARONE™  
Manuscripts

BMJ Open\_KAPEDIS

1  
2  
3 1 **Efficacy and safety of fecal microbiota transplantation against placebo for**  
4  
5  
6 2 **Selective Intestinal Decolonization of patients colonized by KPC-**  
7  
8  
9 3 **producing *Klebsiella pneumoniae* (KAPEDIS study): Study protocol for a**  
10  
11  
12 4 **randomized, double-blind, placebo-controlled, phase 2, superiority**  
13  
14  
15 5 **clinical trial.**

16  
17  
18  
19  
20 7 **Running title**

21  
22 8 Randomized clinical trial of fecal microbiota transplantation for decolonization of KPC-producing  
23  
24 9 *Klebsiella pneumoniae*.

25  
26  
27  
28  
29 11 **Authors**

30  
31  
32 12 Elena Pérez-Nadales<sup>1,2</sup>, Ángela Cano<sup>1,2</sup>, Manuel Recio<sup>1,2</sup>, María José Artacho<sup>3</sup>, Julia Guzmán-  
33  
34 13 Puche<sup>4,2</sup>, Antonio Doblas<sup>1</sup>, Elisa Vidal<sup>1,2</sup>, Clara Natera<sup>1,2</sup>, Luis Martínez-Martínez<sup>4,2</sup>, Julián Torre-  
35  
36 14 Cisneros<sup>1,2\*</sup>, Juan José Castón<sup>1,2</sup>.

37  
38  
39  
40  
41 16 **Affiliations**

- 42  
43  
44 17 1. Maimonides Biomedical Research Institute of Cordoba (IMIBIC/HURS/UCO); Clinical Unit of  
45  
46 18 Infectious Diseases, Reina Sofía University Hospital (HURS); Department of Medicine,  
47  
48 19 University of Cordoba (UCO), Cordoba, Spain.
- 49  
50 20 2. Spanish Network for Research in Infectious Diseases (REIPI, RD16/0016/0008), Instituto de  
51  
52 21 Salud Carlos III (ISCIII), Madrid, Spain.
- 53  
54  
55 22 3. Servicio de Microbiología, Hospital Santa Ana, Motril, Spain.

1  
2  
3 23 4. Clinical Unit of Microbiology, Reina Sofía University Hospital (HURS); Maimonides  
4 24 Biomedical Research Institute of Cordoba (IMIBIC/HURS/UCO); Department of Agricultural  
5 25 Chemistry, Edaphology and Microbiology, University of Cordoba (UCO), Cordoba, Spain.  
6  
7  
8  
9  
10  
11  
12

## 13 28 **Keywords**

14  
15 29 fecal microbiota transplantation, selective intestinal decolonization, *Klebsiella pneumoniae*,  
16 30 carbapenemase.  
17  
18  
19  
20  
21

## 22 32 **\*Corresponding author**

23  
24  
25 33 Julián Torre-Cisneros. Clinical Unit of Infectious Diseases, Reina Sofía University Hospital (HURS);  
26  
27 34 Maimonides Biomedical Research Institute of Cordoba (IMIBIC/HURS/UCO); Department of  
28  
29 35 Medicine, University of Cordoba (UCO), Cordoba, Spain. Julian.torre.sspa@juntadeandalucia.es  
30  
31  
32  
33  
34  
35  
36  
37

## 36 38 **Author ORCID IDs**

37  
38  
39 39 Elena Pérez-Nadales: 0000-0002-6796-1813  
40  
41 40 Luis Martínez-Martínez:0000-0002-6091-4045  
42  
43  
44 41 Julián Torre-Cisneros: 0000-0002-5095-2398  
45  
46 42 Juan José Castón: 0000-0002-7477-2033  
47  
48  
49  
50

## 51 44 **Word count**

52  
53  
54 45 Abstract: 216  
55  
56 46 Mian text: 3591  
57  
58  
59  
60

**48 ABSTRACT**

49 **Introduction:** Infections caused by carbapenemase-producing *Enterobacterales* are frequent  
50 and associated with high rates of mortality. Intestinal carriers are at increased risk of infection  
51 by these microorganisms. Decolonization strategies with antibiotics have not obtained  
52 conclusive results. Fecal microbiota transplantation (FMT) could be an effective and safe  
53 strategy to decolonize intestinal carriers of KPC-producing *Klebsiella pneumoniae* (KPC-Kp) but  
54 this hypothesis needs evaluation in appropriate clinical trials.

56 **Methods and analysis:** The KAPEDIS trial is a single-center, randomized, double-blind, placebo-  
57 controlled, phase 2, superiority clinical trial of FMT for eradication of intestinal colonization by  
58 KPC-Kp. One hundred and twenty patients with rectal colonization by KPC-Kp will be randomized  
59 1:1 to receive encapsulated lyophilized FMT or placebo. The primary outcome is KPC-Kp  
60 eradication at 30 days. Secondary outcomes are: (i) frequency of adverse events; (ii) changes in  
61 KPC-Kp relative load within the intestinal microbiota at 7, 30 and 90 days, estimated by real-  
62 time quantitative PCR analysis of rectal swab samples; and (iii) rates of persistent eradication,  
63 KPC-Kp infection and crude mortality at 90 days. Participants will be monitored for adverse  
64 effects throughout the intervention.

66 **Ethics and dissemination:** Ethical approval was obtained from Reina Sofia University Hospital  
67 Institutional Review Board (2019-003808-13). Trial results will be published in peer-reviewed  
68 journals and disseminated at national and international conferences.

70 **Trial registration number:** Clinicaltrials.gov registration number NCT04760665.

1  
2  
3 **73 STRENGTHS AND LIMITATIONS OF THIS STUDY**  
4

- 5  
6 74 1. The double-blind, randomized, placebo-controlled design will control for spontaneous KPC-  
7  
8 75 Kp decolonization.  
9  
10 76 2. A remote, centralized, automatic randomization system together with double-blinding will  
11  
12 77 be implemented to reduce sources of potential bias.  
13  
14 78 3. The trial is designed to evaluate the superiority of FMT against placebo in preventing  
15  
16 79 multidrug-resistant infections.  
17  
18 80 4. Concomitant administration of antibiotics during the follow-up period could act as  
19  
20 81 confounder.  
21  
22 82 5. The double-blind design is a strength of the study, while the single-center design is a  
23  
24 83 limitation.  
25  
26  
27  
28  
29  
30  
31  
32  
33  
34  
35  
36  
37  
38  
39  
40  
41  
42  
43  
44  
45  
46  
47  
48  
49  
50  
51  
52  
53  
54  
55  
56  
57  
58  
59  
60

## 92 INTRODUCTION

93 Multidrug-resistant bacteria represent an important threat to public health and  
94 particularly to vulnerable patient populations such as the elderly, the chronically ill,  
95 hospitalized patients, transplant and immunosuppressed recipients [1–3]. *Enterobacterales* are  
96 especially important from an antimicrobial resistance perspective, since they are a common  
97 cause of community-associated, as well as healthcare-associated infections. Carbapenem-  
98 resistant *Enterobacterales* (CRE) have been designated as a critical priority in the World Health  
99 Organization (WHO) Global Priority List for antimicrobial-resistant bacteria for the  
100 development of new antibiotics.

101 The gastrointestinal tract is a reservoir for antibiotic-resistant pathogens that cause  
102 disease by a variety of mechanisms. There is increasing evidence that the commensal  
103 microbiota have an indirect role in the control of pathogen invasion by stimulating host  
104 immunity in the intestines [4]. Antibiotic treatment drastically alters the composition of the  
105 microbiota, interfering with this immunological balance, and promoting selection and  
106 proliferation of antibiotic-resistant pathogens. Conversely, the commensal microbiota may be  
107 manipulated to prevent or cure infections caused by pathogenic bacteria, particularly  
108 multidrug-resistant organisms (MDRO) such as vancomycin-resistant *Enterococcus faecium*,  
109 Gram-negative *Enterobacterales*, and *Clostridium difficile* [4,5]. So far, the most common  
110 control strategy for prevention of CRE infection in colonized patients is selective intestinal  
111 decolonization (SDD) with oral, non-absorbable antibiotics, including colistin and  
112 aminoglycosides [6–10]. The reported decolonization rates in observational studies range  
113 between 27.5% and 71% [10,11]. However, development of resistance to decolonizing agents  
114 is frequently reported and there is a lack of randomized clinical trials (RCT) that allow adequate  
115 assessment of the effectiveness and safety of this strategy. Considering these limitations, the  
116 clinical guidelines from the European Society of Clinical Microbiology and Infectious Diseases

1  
2  
3 117 and European Committee on Infection Control (ESCMID-ECIC) do not recommend routine SDD  
4  
5 118 of CRE carriers [10].  
6

7 119 Fecal microbiota transplantation (FMT) is an antibiotic-free decolonization strategy  
8  
9 120 which has been demonstrated to be highly effective for treatment of recurrent *Clostridioides*  
10  
11 121 *difficile* infections (CDI) [5]. It involves administration of fecal material containing distal gut  
12  
13 122 microbiota from a healthy person (donor) to a patient with a disease or condition related to  
14  
15 123 dysbiosis or alterations in the balance of their commensal microbiota. Recently, FMT has  
16  
17 124 received attention as a potential decolonization strategy for MDRO [12–19]. So far, a single  
18  
19 125 randomized control trial (RCT) has evaluated whether oral antibiotics followed by FMT could  
20  
21 126 eradicate intestinal carriage with extended-spectrum beta-lactamase-producing  
22  
23 127 *Enterobacterales* (ESBL-E, 72% of patients) or carbapenemase-producing *Enterobacterales* (CPE,  
24  
25 128 28% of patients) [14]. The study failed to show non-inferiority of FMT, however, there were  
26  
27 129 important limitations, including the lack of a placebo control, and failure to reach the targeted  
28  
29 130 number of patients due to legislative impediments [14]. Besides this RCT, a recent meta-analysis  
30  
31 131 evaluated five European studies (three case series and two case reports), and reported an  
32  
33 132 overall 46% successful decolonization rate at one month after FMT, with higher decolonization  
34  
35 133 rates for *P. aeruginosa* (100% decolonization in 4 cases) as compared to NDM-1-producing  
36  
37 134 *Klebsiella pneumoniae* (36.4%) and ESBL-producing *Klebsiella pneumoniae* (40%) [20]. In  
38  
39 135 contrast, a recent prospective cohort study including 15 CPE carriers reported 60% eradication  
40  
41 136 rates at one month after FMT [18]. In this study, *Klebsiella pneumoniae* was the most common  
42  
43 137 species (7/15) and *blaKPC* was the most common carbapenemase gene (9/15), followed by  
44  
45 138 *blaOXA-48* (5/15) and *blaNDM* (1/15) [18]. The observed differences in effectiveness of FMT for  
46  
47 139 eradication of MDRO may be explained by differences in FMT conditions among studies,  
48  
49 140 including bowel preparation before FMT, the donor, the dose, and FMT preparation and  
50  
51 141 administration procedures. Importantly, overall, studies report minor adverse events in patients  
52  
53  
54  
55  
56  
57  
58  
59  
60



## BMJ Open\_KAPEDIS

1  
2  
3 142 who received FMT for MDRO eradication, and these include vomiting, diarrhea, abdominal pain,  
4  
5 143 and ileus [20,21].  
6

7 144 Despite all the limitations, the available evidence suggests a potential benefit of FMT as  
8  
9 145 a decolonization intervention for CRE, however this needs to be confirmed by future well-  
10  
11 146 designed RCTs. We have designed a phase II, double-blind, placebo-controlled clinical trial to  
12  
13 147 assess the efficacy of oral FMT capsules to eradicate colonization, with KPC carbapenemase-  
14  
15 148 producing *Klebsiella pneumoniae* (KPC-Kp).  
16  
17  
18  
19  
20  
21

## 22 150 **METHODS AND ANALYSIS**

### 23 151 **TRIAL DESIGN AND STUDY SETTING**

24  
25  
26  
27 152 Randomized, double-blind, placebo-controlled, phase 2, superiority clinical trial with two  
28  
29 153 parallel arms: 120 patients will be randomized 1:1 to receive FMT capsules (N=60) or placebo  
30  
31 154 (N=60) (**Figure 1**). Participants will be recruited from Reina Sofía University Hospital, a 1000-bed  
32  
33 155 tertiary, academic, public hospital located in Córdoba, Spain. Some patients may be hospitalized  
34  
35 156 at the time of recruitment and will thus be included during hospital stay. Participants who are  
36  
37 157 not hospitalized or are discharged from hospital will be invited to attend the outpatient clinic.  
38  
39 158 We followed SPIRIT (Standard Protocol Items: Recommendations for Interventional Trials)  
40  
41 159 guidance, outlined in a 33-item checklist (**Annex 1**) and **Figure 1** [22].  
42  
43  
44  
45  
46  
47

#### 48 161 **Primary objective**

- 49  
50  
51 162 • To assess the efficacy of oral FMT capsules to eradicate intestinal colonization by KPC-  
52  
53 163 producing *Klebsiella pneumoniae* at 30 days after FMT.  
54  
55  
56  
57  
58  
59  
60

1  
2  
3 165 **Primary outcome**  
4  
5

- 6 166 • KPC-Kp eradication at 30 days in the intention-to-treat population, including all randomized  
7  
8 167 patients.  
9  
10

11 168

12  
13  
14 169 **Secondary objectives**  
15

- 16  
17 170 • To evaluate the safety of FMT.  
18  
19 171 • To determine if FMT is associated with an early (7 days post-FMT) and late (30 days post-  
20  
21 172 FMT) decrease in the relative load of KPC-Kp within the intestinal microbiota.  
22  
23 173 • To evaluate if FMT is associated with persistent intestinal eradication at 3 months after  
24  
25 174 intervention.  
26  
27 175 • To study if FMT is associated with a decrease in the incidence of KPC-Kp infections at 3  
28  
29 176 months after intervention.  
30  
31 177 • To evaluate if FMT is associated with a decrease in mortality due to KPC-Kp infections at 3  
32  
33 178 months after intervention.  
34  
35

36 179

37  
38  
39  
40 180 **Secondary outcomes**  
41

- 42  
43 181 • Proportion of patients with adverse events during follow-up: (i) reflux following FMT  
44  
45 182 administration; (ii) intolerable gastrointestinal side effects (i.e. abdominal pain, flatulence,  
46  
47 183 vomiting, constipation, diarrhoea or transient fever) leading to discontinuation of FMT  
48  
49 184 before completing the study; (iii) occurrence of any adverse/serious adverse effects.  
50  
51 185 • Changes in the relative load of KPC-Kp within the intestinal microbiota from day 0 (baseline)  
52  
53 186 to days 7 (visit 1), 30 (visit 2) and 90 (visit 3), estimated by quantitative real-time PCR analysis  
54  
55 187 (qPCR) of rectal swab samples (described below).  
56  
57 188 • Proportion of patients with persistent KPC-Kp eradication at 3 months of follow-up.  
58  
59  
60

## BMJ Open\_KAPEDIS

1  
2  
3 189 • Rate of KPC-Kp infections at 3 months.  
4

5 190 • Crude mortality rate at 3 months.  
6  
7  
8 191  
9

10 192 **Definitions**  
11  
12  
13

14 193 • Eradication: Negative rectal swab culture for KPC-Kp together with negative polymerase  
15  
16 194 chain reaction (PCR) test for *bla<sub>KPC</sub>* gene. If the PCR result is positive, the subject is  
17  
18 195 considered not-decolonized.  
19

20 196 • Early decrease in intestinal KPC-Kp load: Significant reduction in the relative load of KPC-Kp  
21  
22 197 within the gut microbiota in rectal swab samples obtained at day 7 of follow-up (visit 2) in  
23  
24 198 patients receiving FMT versus placebo.  
25  
26

27 199 • Late decrease in intestinal KPC-Kp load: Significant reduction in the relative load of KPC-Kp  
28  
29 200 within the gut microbiota in rectal swab samples obtained at day 30 of follow-up (visit 3)  
30  
31 201 in patients receiving FMT versus placebo.  
32  
33

34 202 • Early decolonization: Negative rectal swab culture for KPC-Kp and negative polymerase  
35  
36 203 chain reaction (PCR) test for *bla<sub>KPC</sub>* gene within 7-10 days of intervention.  
37  
38

39 204 • Persistent decolonization: Negative rectal swab culture for KPC-Kp and  
40  
41 205 negative polymerase chain reaction (PCR) test for *bla<sub>KPC</sub>* gene on days 30 and 90 after the  
42  
43 206 intervention.  
44

45 207 • KPC-Kp infection: i) Proven infection: KPC-Kp isolated from clinical specimens in the  
46  
47 208 presence of clinical signs and symptoms of infection; ii) Probable infection: presence of  
48  
49 209 clinical signs and symptoms of infection requiring treatment against KPC-Kp at the  
50  
51 210 discretion of the attending physician, without isolation of KPC-Kp from clinical specimens.  
52  
53

54 211 • Crude mortality: All-cause mortality during follow-up.  
55

56 212 • Intention-To-Treat (ITT) population: all randomized patients.  
57  
58  
59  
60

- 1  
2  
3 213 • Per protocol population (PPP): Patients who meet the following criteria: (i) having been  
4  
5 214 randomized; (ii) complete data for the primary objective; (iii) not having received  
6  
7 215 antibiotics between randomization and visit 3.  
8  
9  
10 216 • Microbiologically evaluable population (PME): patients in whom all rectal colonization  
11  
12 217 studies have been performed during follow-up.  
13  
14  
15 218

## 219 Eligibility criteria

### 220 Inclusion criteria:

- 221 • Adult current or previous patients at Reina Sofía University Hospital with a positive rectal  
222 swab for KPC-Kp within one week before randomization.  
223 • The participant or legal representative must be able to provide written informed consent.  
224 • Absence of KPC-Kp clinical samples at the time of informed consent and in the previous  
225 month.  
226

### 227 Exclusion criteria:

- 228 • Terminal illness or life expectancy of 3 months or less.  
229 • Pregnancy or breastfeeding.  
230 • Inability/unwillingness to orally ingest study medication.  
231 • Dysphagia and aspiration disorders.  
232 • A history of colectomy, colostomy, or ileostomy.  
233 • Patients who have been treated with antibiotics within 30 days prior to consent.  
234 • Absolute neutrophil count  $< 500/\text{mm}^3$ .  
235 • Planned myelosuppressive chemotherapy within 30 days of randomization, i.e.  
236 dexamethasone, chemotherapy against solid tumors or prior to hematopoietic stem cell  
237 transplant (HSCT).

## BMJ Open\_KAPEDIS

- 1  
2  
3 238 • HSCT within 30 days prior to consent.  
4  
5 239 • Clinical symptoms and signs of mucositis.  
6  
7  
8 240 • Major abdominal surgery within the upcoming 30 days.  
9  
10 241 • Patients with Giannella Risk Score > 12 puntos [23].  
11  
12 242 • Selective Digestive Decolonization with oral antibiotics within 3 months prior to  
13  
14 243 randomization.  
15  
16  
17 244 • Severe food allergy.  
18  
19 245

246 **Microbiological studies**

247 Rectal swab samples will be analysed for the presence of CPE, using both culture on  
248 selective chromogenic agar plates (CHROMID® CARBA, bioMérieux, Marcy-l'Étoile, France), and  
249 quantitative real-time PCR.

250 For bacteria grown on culture, identification will be performed using MALDI- TOF mass  
251 spectrometry (Bruker, Germany) and carbapenemase production will be evaluated by a multiple  
252 strategy: (1) Antimicrobial susceptibility testing, with a first step using the commercial system  
253 MicroScan WalkAway and NC53 broth microdilution panels (Beckman Coulter, USA), and a  
254 second step, when a KPC-producing *K. pneumoniae* is identified, determining the MICs of  
255 ertapenem, imipenem, meropenem and other relevant agents (including ceftolozane-  
256 tazobactam, ceftazidime-avibactam, imipenem-relebactam and meropenem-vaborbactam  
257 cefiderocol, fosfomycin, colistin, eravacycline) using EUMDROXF microdilution panels  
258 (Sensititre™, Thermofisher, USA); clinical categories will be defined according to EUCAST  
259 breakpoints; (2) the Modified Carbapenem Inactivation Method, using meropenem discs [24];  
260 (3) an immunochromatography test for the independent identification of OXA-48[-like], KPC,  
261 NDM, IMP and VIM families of carbapenemases (NG-Test CARBA 5; NG Biotech, Guipry, France)  
262 and (4) conventional PCR for detection of the complete *blaKPC* gene, complemented with

1  
2  
3 263 sequencing of the two DNA strands of corresponding amplicon when a positive result is  
4  
5 264 obtained.

6  
7  
8 265 Quantification of the intestinal load of *blaKPC* gene in rectal swabs will be performed by  
9  
10 266 quantitative real-time PCR. The load will be calculated relative to the total bacterial population  
11  
12 267 (represented by the 16S rRNA gene) using the  $\Delta\Delta C_t$  method and pure cultures of KPC-producing  
13  
14  
15 268 *K. pneumoniae* as reference standards, as described in [25,26].  
16  
17

18 269

## 20 270 **Interventions**

### 22 271 Trial interventions

23  
24  
25 272 Patients will be randomised 1:1 to receive oral capsules containing TMF or placebo.  
26  
27 273 Mikrobiomik Healthcare Company S.L. (Vizcaya, Spain) will supply the FMT product (MBK-01),  
28  
29 274 which consists of lyophilised microbiota encapsulated in hypromellose capsules (size 0), with a  
30  
31 275 median mass of 250 g per capsule. Treatment will consist of a batch of 4 capsules, containing 1  
32  
33 276 g of lyophilized microbiota with  $\geq 2 \times 10^{11}$  total bacterial cells, obtained from a minimum of 30  
34  
35 277 g donor feces. Participants in the placebo arm will receive 4 capsules containing microcrystalline  
36  
37 278 cellulose with the same shape, size and weight. The company will also supply the empty  
38  
39 279 capsules to which the placebo will be added at the Pharmacy Service in our hospital. Capsules  
40  
41 280 will be stored, with desiccant, at a temperature of  $5 \pm 3^\circ\text{C}$ , until they are dispensed.  
42  
43 281 Mikrobiomik Healthcare Company will guarantee the traceability of the capsules and a record  
44  
45 282 will be made of their storage, dispensing and destruction. Treatment will be dispensed to trial  
46  
47 283 participants in presence of a member of the research team in a single dose in one day.  
48  
49  
50

51 284

### 52 285 Concomitant care and interventions

53  
54  
55 286 Patients will fast for 12 hours and will receive a laxative preparation (one macrogol 3350,  
56  
57 287 Movicol 13.8 g<sup>®</sup> sachet dissolved in 125 ml water) the day before study intervention. The  
58  
59  
60

## BMJ Open\_KAPEDIS

1  
2  
3 288 concomitant use of systemic antibiotics with activity against KPC-Kp at the time of intervention  
4  
5 289 will not be allowed. Administration of these antibiotics during the study will be considered a  
6  
7 290 proven or probable infection. During the follow-up period, administration of other  
8  
9 291 decolonization guidelines will not be allowed either. Other non-excluded drugs will be allowed.  
10  
11  
12 292

13  
14  
15 293 **Assignment of interventions**

16  
17  
18 294 Allocation to treatment arms will be performed using a centralized, web-based  
19  
20 295 automated randomization system, integrated with the electronic case report file (eCRF), and  
21  
22 296 will be hosted by Maimonides Institute for Biomedical Research of Cordoba (Cordoba, Spain).  
23  
24 297 After the patient's enrolment is confirmed, the randomization specialist will assign a computer-  
25  
26 298 generated random number to each patient. The randomization data will be sent to a designated  
27  
28 299 mailbox, and the responsible nurse will collect the treatment from the pharmacy at the hospital  
29  
30 300 according to the assigned results. A double-blinded design will be used in this study for the  
31  
32 301 physicians and statistical specialists, and patients and research assistants. However, the  
33  
34 302 pharmacist will know the group of each patient. The allocation of the participants' treatment  
35  
36 303 may be revealed at the end of the data analysis.  
37  
38  
39  
40  
41 304

42  
43 305 **Evaluation during and after treatment**

44  
45  
46 306 All patients will be followed for 90 days ( $\pm 5$  days) after the intervention or until death.  
47  
48 307 Four follow-up visits will be scheduled for all participants at day 0 (baseline), day 7–10 (visit 1);  
49  
50 308 day  $30 \pm 4$  (visit 2), and day  $90 \pm 5$  (visit 3) after end of intervention. The procedures that will be  
51  
52 309 performed at each visit are indicated in **Figure 1**. A rectal swab sample will be obtained at each  
53  
54 310 visit for colonization studies and quantification of KPC-Kp load by qPCR (see below). If a  
55  
56 311 participant fails to be present at a scheduled visit, all attempts to contact them and any  
57  
58 312 retrieved information will be recorded. A minimum of three documented contact attempts via  
59  
60

1  
2  
3 313 phone calls will be performed, on separate occasions. All data collected will be included in an  
4  
5 314 electronic database specifically designed for this study, with password-protected user  
6  
7 315 authentication. To ensure the quality of the data, independent audits from investigators and  
8  
9 316 sponsors may be carried out at any moment of the study.  
10  
11  
12  
13  
14

## 15 318 **Adverse effects**

16  
17  
18 319 Adverse effects will be recorded and reported as part of routine follow-up. All events  
19  
20 320 fulfilling the criteria of a serious adverse event that occur during the period of study will be  
21  
22 321 reported to the promoter within 24 hours post event occurrence. An insurance policy will be  
23  
24 322 contracted to cover any harm from trial participation.  
25  
26  
27  
28  
29

## 30 323 31 324 **Sample size calculation**

32  
33  
34 325 Sample size calculation was performed with G\*Power 3.1 program  
35  
36 326 (<https://gpower.software.informer.com/3.1/>), assuming the following estimates: 90% power;  
37  
38 327 5% alpha error; decolonization rate at 30 days of 30% in the control group and 60% in the  
39  
40 328 experimental group; 1:1 treatment to placebo ratio; superiority considered if the confidence  
41  
42 329 interval lower bound for the difference between decolonization rates in the experimental and  
43  
44 330 control groups is greater than 5%; and expected informed consent rate of 40%. The estimated  
45  
46 331 decolonization rate in patients treated with FMT has been obtained from a recently published  
47  
48 332 study [16] . The proportion of decolonized patients in the control group was obtained from a  
49  
50 333 previous prospective observational cohort in our center of patients with intestinal colonization  
51  
52 334 by KPC-Kp (KLEBCOM study, unpublished results). With these considerations, the sample size  
53  
54 335 results in 112 patients. We added 7% more patients in order to account for possible loss to  
55  
56 336 follow-up, resulting in a final sample size of 120 patients (60 patients in the experimental group  
57  
58  
59  
60



## BMJ Open\_KAPEDIS

337 and 60 patients in the control group). To reach the sample size, we will perform active  
338 surveillance of patients with KPC-Kp isolated from microbiological samples in our hospital.

339

**340 Withdrawal from study**

341 In accordance with the Declaration of Helsinki, patients have the right to withdraw from  
342 the study at any time and for any reason, communicating this decision personally or through  
343 their representative. The study withdrawal criteria will be the following: a) at the request of the  
344 patient, through withdrawal of informed consent; b) when the patient no longer complies with  
345 protocol indications (protocol deviation); c) as a result of any adverse event, regardless of its  
346 intensity, at the discretion of the investigator; d) when for any reason the treatment is no longer  
347 safe for the patient; e) as a result of an administrative decision taken by the researchers,  
348 sponsor, or regulatory authority; f) as a result of loss of contact during follow-up. If a patient is  
349 withdrawn from the trial prematurely, the investigator will register the main reason for the  
350 withdrawal in the Clinical Research File. Whenever necessary, the patient will continue to be  
351 followed, according to the standard protocols for treatment of their pathology, at the discretion  
352 of the responsible physician.

353

**354 Statistical analysis**

355 Frequencies and percentages of categorical variables, and median and interquartile  
356 ranges of continuous variables will be described. Comparisons will be performed using Chi-  
357 square or Fisher's test for categorical variables, and Student's T or Mann-Whitney U test for  
358 normally and not-normally distributed continuous variables, respectively.

359 The absolute difference in the percentages of decolonization between the patients in  
360 the experimental and control groups, and its 95% confidence interval, will be calculated.  
361 Clinically significant superiority will be considered if the 95% confidence interval lower bound is

1  
2  
3 362 greater than 5%. For the primary and secondary endpoints, the main analyses will be carried out  
4  
5 363 in the intention-to-treat (ITT) population. Then, an analysis will also be carried out in the per-  
6  
7 364 protocol (PP) population (see definitions). All analyses will be performed using IBM SPSS  
8  
9 365 Statistics software.  
10  
11  
12 366

## 15 367 **ETHICS AND DISSEMINATION**

17  
18 368 The study is funded by Instituto de Salud Carlos III (Science and Innovation Ministry,  
19  
20 369 Spanish government). It was authorized and approved by the ethical review board. Consent to  
21  
22 370 participate will be obtained from all participants prior to the start of the trial by physicians  
23  
24 371 included in our research team. The informed consent is provided as **Annex 2**. All data will be  
25  
26 372 anonymized. The study is being conducted in compliance with the protocol, regulatory  
27  
28 373 requirements, International Council of Harmonization (ICH) E6 Good Clinical Practice and the  
29  
30 374 ethical principles of the latest version of the Declaration of Helsinki, as adopted by the World  
31  
32 375 Medical Association. Each substantial protocol amendment will be notified for approval to the  
33  
34 376 relevant ethics committee(s) prior to implementation. The trial is registered with  
35  
36 377 ClinicalTrials.gov as NCT04760665 (February 18, 2021). All data collected will be kept strictly  
37  
38 378 confidential and in accordance with all relevant legislation on control and protection of personal  
39  
40 379 information. The participants will be identified on documentation by a unique ID number, not  
41  
42 380 by name, in agreement with the European Regulation on data protection (EU 2016/679). All  
43  
44 381 study-related information will be stored securely. The final results will be publicly disseminated  
45  
46 382 regardless of the study outcomes. The results of this study will be published in peer-reviewed  
47  
48 383 journals, as well as national and international conferences.  
49  
50  
51  
52 384

## 57 385 **Patient and public involvement**

## BMJ Open\_KAPEDIS

1  
2  
3 386 Neither patients nor public authorities have been involved in the development of this  
4  
5 387 study protocol.  
6

7 388  
8  
9

10  
11 389 **DISCUSSION**  
12

13 390 In recent years there has been a significant increase in the frequency of infections  
14  
15 391 caused by carbapenem-producing *Enterobacterales* (CRE). These infections are associated with  
16  
17 392 high mortality rates as a result of the difficulty in initiating effective empirical treatment and  
18  
19 393 the limited therapeutic alternatives available for targeted treatment [27,28]. Rectal  
20  
21 394 colonization with CRE has previously been identified as an important risk factor for the  
22  
23 395 development of subsequent CRE infection [9,23,29,30]. This situation has promoted efforts to  
24  
25 396 prevent the acquisition and spread of these bacteria, including development of novel  
26  
27 397 decolonization strategies.  
28  
29

30  
31 398 The utility of fecal microbiota transplantation (FMT) for gut decolonization of multidrug  
32  
33 399 resistant organisms (MDROs) has been explored in several case reports, one prospective  
34  
35 400 observational cohort and one RCT, summarized in a number of systematic reviews and  
36  
37 401 metanalysis [18,20,21,31,32]. The only RCT, conducted by the R-GNOSIS study group, tested  
38  
39 402 the efficacy of frozen capsulized FMT following a 5-day course of oral antibiotics in 39 carriers  
40  
41 403 of extended spectrum  $\beta$ -lactamase *Enterobacterales* (ESBL-E) and carbapenemase-producing  
42  
43 404 *Enterobacterales* (CPE) [14]. The desirability of pre-FMT antibiotic therapy in the context of  
44  
45 405 MDRO decolonization is unclear. Firstly, the administration of antibiotics renders it very difficult  
46  
47 406 to unravel the independent contributions of antibiotics and FMT to CRE decolonization.  
48  
49 407 Secondly, pre-clinical studies with mouse models suggest that antibiotic pre-conditioning may  
50  
51 408 improve the engraftment of specific taxa but not the overall engraftment of donor microbiota  
52  
53 409 in the recipient mice [33,34]. Bar-Yoseph *et al* [18] reported that the use of antibiotics in the  
54  
55 410 post-FMT period interfered with FMT engraftment among CPE-colonized recipients [18].  
56  
57  
58  
59  
60

1  
2  
3 411 In this RCT, patients will be receiving FMT based on lyophilized oral capsules, which have  
4  
5 412 been proven non-inferior to colonoscopy for the treatment of recurrent CDI and which also have  
6  
7 413 higher acceptance by patients (Kao et al. 2017). Further, patients with CPE colonization who  
8  
9 414 receive oral capsulized FMT achieved high eradication success (60%) at one month [18]. In  
10  
11 415 addition, using lyophilized preparations facilitates capsule handling and stability, making it more  
12  
13 416 feasible in hospital routine.

14  
15  
16 417 Regarding the amount of starting stool material, the European Consensus Conference  
17  
18 418 on Faecal Microbiota Transplantation in Clinical Practice for the treatment of *Clostridium*  
19  
20 419 *difficile* infection (CDI) recommends a minimum of 30 g for the treatment of recurrent *CDI* [35].  
21  
22 420 Nevertheless, the optimal dose in FMT remains unclear since no randomized trials have  
23  
24 421 compared different amounts of faecal matter so far. In the present RCT, the capsules with the  
25  
26 422 lyophilized FMT material will be provided by an external company, which has been legally  
27  
28 423 authorized for production of the FMT capsules by the Spanish Agency for Medications and  
29  
30 424 Healthcare Products (AEMPS). The company will guarantee that each treatment, consisting of a  
31  
32 425 batch of 4 capsules, will contain a minimum of  $2 \times 10^{11}$  total bacterial cells obtained from a  
33  
34 426 minimum of 30 g of feces.

35  
36  
37 427 The overall aim of this RCT is to evaluate the efficacy and safety of FMT for sustained  
38  
39 428 eradication of CPE without using antibiotics that could impact the viability of the FMT content  
40  
41 429 or confound results. It has been designed with placebo control to allow estimation of the  
42  
43 430 contribution of spontaneous decolonization to CPE eradication. If the efficacy and safety of FMT  
44  
45 431 are proven, FMT may be considered a better approach for decolonization of gut MDRO than  
46  
47 432 selective antibiotics decolonization, with lower ecological impact, and potentially reducing the  
48  
49 433 risk of subsequent infections.

50  
51  
52 434

## 53 54 55 56 57 58 435 **REFERENCES**

## BMJ Open\_KAPEDIS

- 1  
2  
3 436 1 Aguado JM, Silva JT, Fernández-Ruiz M, *et al.* Management of multidrug resistant Gram-  
4  
5 437 negative bacilli infections in solid organ transplant recipients: SET/GESITRA-SEIMC/REIPI  
6  
7 438 recommendations. *Transplant. Rev.* 2018;**32**:36–57. doi:10.1016/j.trre.2017.07.001  
8  
9 439 2 Pérez-Nadales E, Gutiérrez-Gutiérrez B, Natera AM, *et al.* Predictors of mortality in solid  
10  
11 440 organ transplant recipients with bloodstream infections due to carbapenemase-  
12  
13 441 producing Enterobacterales: The impact of cytomegalovirus disease and lymphopenia.  
14  
15 442 *Am J Transplant* 2020;**20**:1629–41. doi:10.1111/ajt.15769  
16  
17 443 3 van Duin D, Doi Y. The global epidemiology of carbapenemase-producing  
18  
19 444 Enterobacteriaceae. *Virulence.* 2017;**8**:460–9. doi:10.1080/21505594.2016.1222343  
20  
21 445 4 Buffie CG, Pamer EG. Microbiota-mediated colonization resistance against intestinal  
22  
23 446 pathogens. *Nat. Rev. Immunol.* 2013;**13**:790–801. doi:10.1038/nri3535  
24  
25 447 5 Quraishi MN, Widlak M, Bhala N, *et al.* Systematic review with meta-analysis: the  
26  
27 448 efficacy of faecal microbiota transplantation for the treatment of recurrent and  
28  
29 449 refractory *Clostridium difficile* infection. *Aliment. Pharmacol. Ther.* 2017;**46**:479–93.  
30  
31 450 doi:10.1111/apt.14201  
32  
33 451 6 Saidel-Odes L, Polachek H, Peled N, *et al.* A randomized, double-blind, placebo-  
34  
35 452 controlled trial of selective digestive decontamination using oral gentamicin and oral  
36  
37 453 polymyxin E for eradication of carbapenem-resistant *Klebsiella pneumoniae* carriage.  
38  
39 454 *Infect Control Hosp Epidemiol* 2012;**33**:14–9. doi:10.1086/663206  
40  
41 455 7 Oren I, Sprecher H, Finkelstein R, *et al.* Eradication of carbapenem-resistant  
42  
43 456 Enterobacteriaceae gastrointestinal colonization with nonabsorbable oral antibiotic  
44  
45 457 treatment: A prospective controlled trial. *Am J Infect Control* 2013;**41**:1167–72.  
46  
47 458 doi:10.1016/j.ajic.2013.04.018  
48  
49 459 8 Lübbert C, Fauchoux S, Becker-Rux D, *et al.* Rapid emergence of secondary resistance to  
50  
51 460 gentamicin and colistin following selective digestive decontamination in patients with  
52  
53 461 KPC-2-producing *Klebsiella pneumoniae*: a single-centre experience. *Int J Antimicrob*  
54  
55  
56  
57  
58  
59  
60

- 1  
2  
3 462 *Agents* 2013;**42**:565–70. doi:10.1016/J.IJANTIMICAG.2013.08.008  
4  
5 463 9 Machuca I, Gutiérrez-Gutiérrez B, Pérez Cortés S, *et al.* Oral decontamination with  
6  
7 464 aminoglycosides is associated with lower risk of mortality and infections in high-risk  
8  
9 465 patients colonized with colistin-resistant, KPC-producing *Klebsiella pneumoniae*. *J*  
10  
11 466 *Antimicrob Chemother* 2016;**71**:3242–9. doi:10.1093/jac/dkw272  
12  
13  
14 467 10 Tacconelli E, Mazzaferri F, de Smet AM, *et al.* ESCMID-EUCIC clinical guidelines on  
15  
16 468 decolonization of multidrug-resistant Gram-negative bacteria carriers. *Clin Microbiol*  
17  
18 469 *Infect* 2019;**0**. doi:10.1016/j.cmi.2019.01.005  
19  
20  
21 470 11 Bar-Yoseph H, Hussein K, Braun E, *et al.* Natural history and decolonization strategies  
22  
23 471 for ESBL/carbapenem-resistant Enterobacteriaceae carriage: systematic review and  
24  
25 472 meta-analysis. *J Antimicrob Chemother* 2016;**71**:2729–39. doi:10.1093/jac/dkw221  
26  
27  
28 473 12 Seong H, Lee SK, Cheon JH, *et al.* Fecal Microbiota Transplantation for multidrug-  
29  
30 474 resistant organism: Efficacy and Response prediction. *J Infect* 2020;**81**:719–25.  
31  
32 475 doi:10.1016/j.jinf.2020.09.003  
33  
34 476 13 Saïdani N, Lagier JC, Cassir N, *et al.* Faecal microbiota transplantation shortens the  
35  
36 477 colonisation period and allows re-entry of patients carrying carbapenamase-producing  
37  
38 478 bacteria into medical care facilities. *Int J Antimicrob Agents* 2019;**53**:355–61.  
39  
40 479 doi:10.1016/j.ijantimicag.2018.11.014  
41  
42  
43 480 14 Huttner BD, de Lastours V, Wassenberg M, *et al.* A 5-day course of oral antibiotics  
44  
45 481 followed by faecal transplantation to eradicate carriage of multidrug-resistant  
46  
47 482 Enterobacteriaceae: a randomized clinical trial. *Clin Microbiol Infect* 2019;**25**:830–8.  
48  
49 483 doi:10.1016/J.CMI.2018.12.009  
50  
51  
52 484 15 Dinh A, Fessi H, Duran C, *et al.* Clearance of carbapenem-resistant Enterobacteriaceae  
53  
54 485 vs vancomycin-resistant enterococci carriage after faecal microbiota transplant: a  
55  
56 486 prospective comparative study. *J Hosp Infect* 2018;**99**:481–6.  
57  
58 487 doi:10.1016/j.jhin.2018.02.018  
59  
60

## BMJ Open\_KAPEDIS

- 1  
2  
3 488 16 Bilinski J, Grzesiowski P, Sorensen N, *et al.* Fecal Microbiota Transplantation in Patients  
4  
5 489 With Blood Disorders Inhibits Gut Colonization With Antibiotic-Resistant Bacteria:  
6  
7 490 Results of a Prospective, Single-Center Study. *Clin Infect Dis* 2017;**65**:364–70.  
8  
9 491 doi:10.1093/cid/cix252  
10  
11  
12 492 17 Battipaglia G, Malard F, Rubio MT, *et al.* Fecal microbiota transplantation before or  
13  
14 493 after allogeneic hematopoietic transplantation in patients with hematologic  
15  
16 494 malignancies carrying multidrug-resistance bacteria. *Haematologica* 2019;**104**:1682–8.  
17  
18 495 doi:10.3324/haematol.2018.198549  
19  
20  
21 496 18 Bar-Yoseph H, Carasso S, Shklar S, *et al.* Oral Capsulized Fecal Microbiota  
22  
23 497 Transplantation for Eradication of Carbapenemase-producing Enterobacteriaceae  
24  
25 498 Colonization With a Metagenomic Perspective. *Clin Infect Dis* 2021;**73**:e166–75.  
26  
27 499 doi:10.1093/cid/ciaa737  
28  
29  
30 500 19 Singh R, Groot PF de, Geerlings SE, *et al.* Fecal microbiota transplantation against  
31  
32 501 intestinal colonization by extended spectrum beta-lactamase producing  
33  
34 502 Enterobacteriaceae: a proof of principle study. *BMC Res Notes* 2018;**11**.  
35  
36 503 doi:10.1186/S13104-018-3293-X  
37  
38  
39 504 20 Tavoukjian V. Faecal microbiota transplantation for the decolonization of antibiotic-  
40  
41 505 resistant bacteria in the gut: a systematic review and meta-analysis. *J Hosp Infect*  
42  
43 506 2019;**102**:174–88. doi:10.1016/J.JHIN.2019.03.010  
44  
45  
46 507 21 Saha S, Tariq R, Tosh PK, *et al.* Faecal microbiota transplantation for eradicating  
47  
48 508 carriage of multidrug-resistant organisms: a systematic review. *Clin. Microbiol. Infect.*  
49  
50 509 2019;**25**:958–63. doi:10.1016/j.cmi.2019.04.006  
51  
52  
53 510 22 Chan A-W, Tetzlaff JM, Altman DG, *et al.* SPIRIT 2013 Statement: Defining Standard  
54  
55 511 Protocol Items for Clinical Trials. *Ann Intern Med* 2013;**158**:200. doi:10.7326/0003-  
56  
57 512 4819-158-3-201302050-00583  
58  
59 513 23 Cano A, Gutiérrez-Gutiérrez B, Machuca I, *et al.* Risks of Infection and Mortality among  
60

- 1  
2  
3 514 Patients Colonized with *Klebsiella pneumoniae* Carbapenemase-Producing K.  
4  
5 515 *pneumoniae*: Validation of Scores and Proposal for Management. *Clin Infect Dis*  
6  
7 516 2018;**66**:1204–10. doi:10.1093/cid/cix991  
8  
9  
10 517 24 VM P, PJ S, DR L, *et al.* Modified Carbapenem Inactivation Method for Phenotypic  
11  
12 518 Detection of Carbapenemase Production among Enterobacteriaceae. *J Clin Microbiol*  
13  
14 519 2017;**55**:2321–33. doi:10.1128/JCM.00193-17  
15  
16 520 25 Lerner A, Adler A, Abu-Hanna J, *et al.* Spread of KPC-producing carbapenem-resistant  
17  
18 521 *Enterobacteriaceae*: The importance of super-spreaders and rectal KPC concentration.  
19  
20 522 *Clin Microbiol Infect* 2015;**21**:470.e1-470.e7. doi:10.1016/j.cmi.2014.12.015  
21  
22  
23 523 26 Ramos-Ramos JC, Lázaro-Perona F, Arribas JR, *et al.* Proof-of-concept trial of the  
24  
25 524 combination of lactitol with *Bifidobacterium bifidum* and *Lactobacillus acidophilus* for  
26  
27 525 the eradication of intestinal OXA-48-producing *Enterobacteriaceae*. *Gut Pathog*  
28  
29 526 2020;**12**. doi:10.1186/s13099-020-00354-9  
30  
31  
32 527 27 Gutiérrez-Gutiérrez B, Salamanca E, de Cueto M, *et al.* Effect of appropriate  
33  
34 528 combination therapy on mortality of patients with bloodstream infections due to  
35  
36 529 carbapenemase-producing *Enterobacteriaceae* (INCREMENT): a retrospective cohort  
37  
38 530 study. *Lancet Infect Dis* 2017;**17**:726–34. doi:10.1016/S1473-3099(17)30228-1  
39  
40  
41 531 28 Rodríguez-Baño J, Gutiérrez-Gutiérrez B, Machuca I, *et al.* Treatment of Infections  
42  
43 532 Caused by Extended-Spectrum-Beta-Lactamase-, AmpC-, and Carbapenemase-  
44  
45 533 Producing Enterobacteriaceae. *Clin Microbiol Rev* 2018;**31**:e00079-17.  
46  
47 534 doi:10.1128/CMR.00079-17  
48  
49  
50 535 29 Giannella M, Trecarichi EM, De Rosa FG, *et al.* Risk factors for carbapenem-resistant  
51  
52 536 *Klebsiella pneumoniae* bloodstream infection among rectal carriers: a prospective  
53  
54 537 observational multicentre study. *Clin Microbiol Infect* 2014;**20**:1357–62.  
55  
56 538 doi:10.1111/1469-0691.12747  
57  
58  
59 539 30 Tischendorf J, de Avila RA, Safdar N. Risk of infection following colonization with  
60



## BMJ Open\_KAPEDIS

- 1  
2  
3 540 carbapenem-resistant Enterobacteriaceae: A systematic review. *Am J Infect Control*  
4  
5 541 2016;**44**:539–43. doi:10.1016/J.AJIC.2015.12.005  
6  
7 542 31 Davido B, Batista R, Dinh A, *et al.* Fifty shades of graft: How to improve the efficacy of  
8  
9 faecal microbiota transplantation for decolonization of antibiotic-resistant bacteria. *Int*  
10 543  
11  
12 544 *J Antimicrob Agents* 2019;**53**:553–6. doi:10.1016/J.IJANTIMICAG.2019.03.008  
13  
14 545 32 Woodworth MH, Hayden MK, Young VB, *et al.* The Role of Fecal Microbiota  
15  
16 546 Transplantation in Reducing Intestinal Colonization With Antibiotic-Resistant  
17  
18 547 Organisms: The Current Landscape and Future Directions. *Open Forum Infect Dis*  
19  
20 548 2019;**6**. doi:10.1093/OFID/OFZ288  
21  
22  
23 549 33 Freitag TL, Hartikainen A, Jouhten H, *et al.* Minor Effect of Antibiotic Pre-treatment on  
24  
25 550 the Engraftment of Donor Microbiota in Fecal Transplantation in Mice. *Front Microbiol*  
26  
27 551 2019;**10**. doi:10.3389/FMICB.2019.02685  
28  
29  
30 552 34 Ji SK, Yan H, Jiang T, *et al.* Preparing the Gut with Antibiotics Enhances Gut Microbiota  
31  
32 553 Reprogramming Efficiency by Promoting Xenomicrobiota Colonization. *Front Microbiol*  
33  
34 554 2017;**8**. doi:10.3389/FMICB.2017.01208  
35  
36  
37 555 35 Cammarota G, Ianiro G, Tilg H, *et al.* European consensus conference on faecal  
38  
39 556 microbiota transplantation in clinical practice. *Gut* 2017;**66**:569–80.  
40  
41 557 doi:10.1136/GUTJNL-2016-313017  
42  
43  
44 558

**CONTRIBUTIONS**

45  
46  
47 560 JCO conceived and designed the study. JCO obtained funding for the research. JCO is the  
48  
49 561 Study Coordinator. EPN and LMM will coordinate microbiological studies. EPN and JCO drafted  
50  
51 562 the manuscript. All other authors will be directly involved in different aspects of this RCT and  
52  
53 563 have reviewed, edited and approved the final version of the paper.  
54  
55  
56  
57 564  
58  
59 565  
60

1  
2  
3 566 **TRIAL STATUS**  
4

5 567 Current protocol approved is version 1.0 dated 4<sup>th</sup> September 2019. Recruitment will  
6  
7 568 begin on 5<sup>th</sup> October 2021 and will end on 5<sup>th</sup> October 2023.  
8  
9

10 569

11  
12 570 **FUNDING**  
13

14 571 This work was supported by (1) research funds “FIS PI19-00281-KAPEDIS” granted to JJC  
15  
16 572 from *Plan Estatal de I+D+i 2013-2016*, co-financed by the *ISCIII-Subdirección General de*  
17  
18 573 *Evaluación y Fomento de la Investigación* and the *Fondo Europeo de Desarrollo Regional (FEDER)*;  
19  
20 574 and (2) *Plan Nacional de I+D+i 2013-2016* and *Instituto de Salud Carlos III (ISCIII), Subdirección*  
21  
22 575 *General de Redes y Centros de Investigación Cooperativa, Ministerio de Ciencia, Innovación y*  
23  
24 576 *Universidades*, Spanish Network for Research in Infectious Diseases (RD16/0016/0008) -  
25  
26 577 co-financed by European Development Regional Fund “A way to achieve Europe”, Operative  
27  
28 578 program Intelligent Growth 2014-2020. EPN holds a research contract from *Consejería de Salud*  
29  
30 579 *y Familias, Junta de Andalucía* (RH-0065-2020I). The funders had no role in study design, data  
31  
32 580 collection and interpretation, or the decision to submit the work for publication.  
33  
34  
35

36 581

37  
38  
39 582 **COMPETING INTERESTS STATEMENT**  
40

41 583 Juan José Castón reports personal fees from Merck for educational purposes and a  
42  
43 584 research grant from Pfizer outside the submitted work. All other authors declare that they have  
44  
45 585 no competing interests.  
46  
47

48 586

49  
50 587 **PATIENTS CONSENT FOR PUBLICATION**  
51

52 588 Not required  
53  
54

55 589  
56  
57  
58  
59  
60

**Figure 1.** Schedule of enrolment, interventions, and assessments according to SPIRIT guidelines.

| TIMEPOINT**                          | STUDY PERIOD |            |                  |                    |                      |                      |           |
|--------------------------------------|--------------|------------|------------------|--------------------|----------------------|----------------------|-----------|
|                                      | Enrolment    | Allocation | Post-allocation  |                    |                      |                      | Close-out |
|                                      | 0 d          | 0 d        | Visit 0<br>(0 d) | Visit1<br>(7-10 d) | Visit2<br>(30 ± 4 d) | Visit3<br>(90 ± 5 d) | 90 d      |
| <b>ENROLMENT:</b>                    |              |            |                  |                    |                      |                      |           |
| Eligibility screen                   | X            |            |                  |                    |                      |                      |           |
| Informed consent                     | X            |            |                  |                    |                      |                      |           |
| Pregnancy test <sup>1</sup>          | X            |            |                  |                    |                      |                      |           |
| Randomization                        | X            |            |                  |                    |                      |                      |           |
| Medical history / Anamnesis          | X            |            |                  | X                  | X                    | X                    |           |
| Physical examination <sup>2</sup>    | X            |            |                  | X <sup>3</sup>     | X <sup>3</sup>       | X <sup>3</sup>       |           |
| Hemogram / Biochemistry <sup>3</sup> | X            |            |                  | X                  | X                    | X                    |           |
| Serology <sup>4</sup>                | X            |            |                  |                    |                      |                      |           |
| Rectal swab sample                   | X            |            | X                | X                  | X                    | X                    |           |
| Recording of concomitant medication  | X            |            |                  | X                  | X                    | X                    |           |
| Dispensing control                   | X            |            |                  |                    |                      |                      |           |
| Allocation                           |              | X          |                  |                    |                      |                      |           |
| <b>INTERVENTIONS:</b>                |              |            |                  |                    |                      |                      |           |
| FMT                                  |              |            | X                |                    |                      |                      |           |
| Placebo                              |              |            | X                |                    |                      |                      |           |
| <b>ASSESSMENTS:</b>                  |              |            |                  |                    |                      |                      |           |
| <b>Primary outcome</b>               |              |            |                  |                    |                      |                      |           |
| KPC-Kp eradication                   |              |            |                  |                    | X                    |                      | X         |
| <b>Secondary outcomes</b>            |              |            |                  |                    |                      |                      |           |
| Adverse events                       |              |            | X                | X                  | X                    | X                    | X         |
| Changes in RL <sub>KPC</sub>         |              |            | X                | X                  | X                    | X                    | X         |
| Decolonization test                  |              |            | X                | X                  | X                    | X                    | X         |
| Persistent KPC-Kp eradication        |              |            |                  |                    |                      | X                    | X         |
| Rate of KPC-Kp infections            |              |            |                  |                    |                      | X                    | X         |
| Crude mortality                      |              |            |                  |                    |                      | X                    | X         |

Abbreviations: d, days; FMT, Fecal Microbiota Transplantation; RL<sub>KPC</sub>, relative intestinal load of *bla*<sub>KPC</sub>.

<sup>1</sup> If female and of child-bearing age.

<sup>2</sup> Physical examination: weight, height, blood pressure, heart and respiratory rate and temperature. Does not apply if interview is conducted telephonically.

1  
2  
3 <sup>3</sup> Hemogram with at least hemoglobin, white blood cell count, neutrophils and platelets. Blood chemistry  
4 at least with creatinine, urea, bilirubin, transaminases and PCR.

5  
6 <sup>4</sup> Serology for hepatitis A, B and C viruses; human immunodeficiency virus (HIV), HIV-1 and HIV-2;  
7 nontreponemal rapid plasma reagin (RPR) test, and fluorescent treponemal antibody absorbed (FTA-ABS)  
8 test.  
9  
10  
11  
12  
13  
14  
15  
16  
17  
18  
19  
20  
21  
22  
23  
24  
25  
26  
27  
28  
29  
30  
31  
32  
33  
34  
35  
36  
37  
38  
39  
40  
41  
42  
43  
44  
45  
46  
47  
48  
49  
50  
51  
52  
53  
54  
55  
56  
57  
58  
59  
60

For peer review only

**Annex 1. SPIRIT 2013 Checklist: Recommended items to address in a clinical trial protocol and related documents.**

| Section/item                                              | Item No | Description                                                                                                                                                                                                                                                                              | Page in the document |
|-----------------------------------------------------------|---------|------------------------------------------------------------------------------------------------------------------------------------------------------------------------------------------------------------------------------------------------------------------------------------------|----------------------|
| <b>Administrative information</b>                         |         |                                                                                                                                                                                                                                                                                          |                      |
| Title                                                     | 1       | Descriptive title identifying the study design, population, interventions, and, if applicable, trial acronym                                                                                                                                                                             | 1                    |
| Trial registration                                        | 2a      | Trial identifier and registry name. If not yet registered, name of intended registry                                                                                                                                                                                                     | 3                    |
|                                                           | 2b      | All items from the World Health Organization Trial Registration Data Set                                                                                                                                                                                                                 | --                   |
| Protocol version                                          | 3       | Date and version identifier                                                                                                                                                                                                                                                              | 24                   |
| Funding                                                   | 4       | Sources and types of financial, material, and other support                                                                                                                                                                                                                              | 24                   |
| Roles and responsibilities                                | 5a      | Names, affiliations, and roles of protocol contributors                                                                                                                                                                                                                                  | 1, 24                |
|                                                           | 5b      | Name and contact information for the trial sponsor                                                                                                                                                                                                                                       | --                   |
|                                                           | 5c      | Role of study sponsor and funders, if any, in study design; collection, management, analysis, and interpretation of data; writing of the report; and the decision to submit the report for publication, including whether they will have ultimate authority over any of these activities | 24                   |
|                                                           | 5d      | Composition, roles, and responsibilities of the coordinating centre, steering committee, endpoint adjudication committee, data management team, and other individuals or groups overseeing the trial, if applicable (see Item 21a for data monitoring committee)                         | --                   |
| <b>Introduction</b>                                       |         |                                                                                                                                                                                                                                                                                          |                      |
| Background and rationale                                  | 6a      | Description of research question and justification for undertaking the trial, including summary of relevant studies (published and unpublished) examining benefits and harms for each intervention                                                                                       | 5-7                  |
|                                                           | 6b      | Explanation for choice of comparators                                                                                                                                                                                                                                                    | 5-7                  |
| Objectives                                                | 7       | Specific objectives or hypotheses                                                                                                                                                                                                                                                        | 7,8                  |
| Trial design                                              | 8       | Description of trial design including type of trial (e.g., parallel group, crossover, factorial, single group), allocation ratio, and framework (e.g., superiority, equivalence, noninferiority, exploratory)                                                                            | 7                    |
| <b>Methods: Participants, interventions, and outcomes</b> |         |                                                                                                                                                                                                                                                                                          |                      |
| Study setting                                             | 9       | Description of study settings (e.g., community clinic, academic hospital) and list of countries where data will be collected. Reference to where list of study sites can be obtained                                                                                                     | 7                    |
| Eligibility criteria                                      | 10      | Inclusion and exclusion criteria for participants. If applicable, eligibility criteria for study centres and individuals who will perform the interventions (e.g., surgeons, psychotherapists)                                                                                           | 10-11                |
| Interventions                                             | 11a     | Interventions for each group with sufficient detail to allow replication, including how and when they will be administered                                                                                                                                                               | 12-13                |
|                                                           | 11b     | Criteria for discontinuing or modifying allocated interventions for a given trial participant (e.g., drug dose change in response to harms, participant request, or improving/worsening disease)                                                                                         | 14-15                |
|                                                           | 11c     | Strategies to improve adherence to intervention protocols, and any procedures for monitoring adherence (e.g., drug tablet return, laboratory tests)                                                                                                                                      | 12, Figure 1         |
|                                                           | 11d     | Relevant concomitant care and interventions that are permitted or prohibited during the trial                                                                                                                                                                                            | 10-13                |

|    |                                                                     |     |                                                                                                                                                                                                                                                                                                                                                                                                                  |               |
|----|---------------------------------------------------------------------|-----|------------------------------------------------------------------------------------------------------------------------------------------------------------------------------------------------------------------------------------------------------------------------------------------------------------------------------------------------------------------------------------------------------------------|---------------|
| 1  |                                                                     |     |                                                                                                                                                                                                                                                                                                                                                                                                                  |               |
| 2  |                                                                     |     |                                                                                                                                                                                                                                                                                                                                                                                                                  |               |
| 3  |                                                                     |     |                                                                                                                                                                                                                                                                                                                                                                                                                  |               |
| 4  |                                                                     |     |                                                                                                                                                                                                                                                                                                                                                                                                                  |               |
| 5  | Outcomes                                                            | 12  | Primary, secondary, and other outcomes, including the specific measurement variable (e.g., systolic blood pressure), analysis metric (e.g., change from baseline, final value, time to event), method of aggregation (e.g., median, proportion), and time point for each outcome. Explanation of the clinical relevance of chosen efficacy and harm outcomes is strongly recommended                             | 7,8, Figure 1 |
| 6  |                                                                     |     |                                                                                                                                                                                                                                                                                                                                                                                                                  |               |
| 7  |                                                                     |     |                                                                                                                                                                                                                                                                                                                                                                                                                  |               |
| 8  | Participant timeline                                                | 13  | Time schedule of enrolment, interventions (including any run-ins and washouts), assessments, and visits for participants. A schematic diagram is highly recommended (see Figure)                                                                                                                                                                                                                                 | Figure 1      |
| 9  |                                                                     |     |                                                                                                                                                                                                                                                                                                                                                                                                                  |               |
| 10 | Sample size                                                         | 14  | Estimated number of participants needed to achieve study objectives and how it was determined, including clinical and statistical assumptions supporting any sample size calculations                                                                                                                                                                                                                            | 14-15         |
| 11 |                                                                     |     |                                                                                                                                                                                                                                                                                                                                                                                                                  |               |
| 12 | Recruitment                                                         | 15  | Strategies for achieving adequate participant enrolment to reach target sample size                                                                                                                                                                                                                                                                                                                              | 14-15         |
| 13 | <b>Methods: Assignment of interventions (for controlled trials)</b> |     |                                                                                                                                                                                                                                                                                                                                                                                                                  |               |
| 14 | Allocation:                                                         |     |                                                                                                                                                                                                                                                                                                                                                                                                                  |               |
| 15 | Sequence generation                                                 | 16a | Method of generating the allocation sequence (e.g., computer-generated random numbers), and list of any factors for stratification. To reduce predictability of a random sequence, details of any planned restriction (e.g., blocking) should be provided in a separate document that is unavailable to those who enrol participants or assign interventions                                                     | 13            |
| 16 |                                                                     |     |                                                                                                                                                                                                                                                                                                                                                                                                                  |               |
| 17 | Allocation concealment mechanism                                    | 16b | Mechanism of implementing the allocation sequence (e.g., central telephone; sequentially numbered, opaque, sealed envelopes), describing any steps to conceal the sequence until interventions are assigned                                                                                                                                                                                                      | 13            |
| 18 |                                                                     |     |                                                                                                                                                                                                                                                                                                                                                                                                                  |               |
| 19 | Implementation                                                      | 16c | Who will generate the allocation sequence, who will enrol participants, and who will assign participants to interventions                                                                                                                                                                                                                                                                                        | 13            |
| 20 | Blinding (masking)                                                  | 17a | Who will be blinded after assignment to interventions (e.g., trial participants, care providers, outcome assessors, data analysts), and how                                                                                                                                                                                                                                                                      | 13            |
| 21 |                                                                     |     |                                                                                                                                                                                                                                                                                                                                                                                                                  |               |
| 22 |                                                                     | 17b | If blinded, circumstances under which unblinding is permissible, and procedure for revealing a participant's allocated intervention during the trial                                                                                                                                                                                                                                                             | 13            |
| 23 | <b>Methods: Data collection, management, and analysis</b>           |     |                                                                                                                                                                                                                                                                                                                                                                                                                  |               |
| 24 | Data collection methods                                             | 18a | Plans for assessment and collection of outcome, baseline, and other trial data, including any related processes to promote data quality (e.g., duplicate measurements, training of assessors) and a description of study instruments (e.g., questionnaires, laboratory tests) along with their reliability and validity, if known. Reference to where data collection forms can be found, if not in the protocol | Figure 1      |
| 25 |                                                                     |     |                                                                                                                                                                                                                                                                                                                                                                                                                  |               |
| 26 |                                                                     | 18b | Plans to promote participant retention and complete follow-up, including list of any outcome data to be collected for participants who discontinue or deviate from intervention protocols                                                                                                                                                                                                                        | 14-15         |
| 27 |                                                                     |     |                                                                                                                                                                                                                                                                                                                                                                                                                  |               |
| 28 | Data management                                                     | 19  | Plans for data entry, coding, security, and storage, including any related processes to promote data quality (e.g., double data entry; range checks for data values). Reference to where details of data management procedures can be found, if not in the protocol                                                                                                                                              | 14-15         |
| 29 |                                                                     |     |                                                                                                                                                                                                                                                                                                                                                                                                                  |               |
| 30 | Statistical methods                                                 | 20a | Statistical methods for analysing primary and secondary outcomes. Reference to where other details of the statistical analysis plan can be found, if not in the protocol                                                                                                                                                                                                                                         | 15-16         |
| 31 |                                                                     |     |                                                                                                                                                                                                                                                                                                                                                                                                                  |               |
| 32 |                                                                     | 20b | Methods for any additional analyses (e.g., subgroup and adjusted analyses)                                                                                                                                                                                                                                                                                                                                       | 15-16         |
| 33 |                                                                     |     |                                                                                                                                                                                                                                                                                                                                                                                                                  |               |
| 34 |                                                                     | 20c | Definition of analysis population relating to protocol non-adherence (e.g., as randomised analysis), and any statistical methods to handle missing data (e.g., multiple imputation)                                                                                                                                                                                                                              | 15-16         |
| 35 | <b>Methods: Monitoring</b>                                          |     |                                                                                                                                                                                                                                                                                                                                                                                                                  |               |
| 36 | Data monitoring                                                     | 21a | Composition of data monitoring committee (DMC); summary of its role and reporting structure; statement of whether it is independent from the sponsor and competing interests; and reference to where further details about its charter can be found, if not in the protocol. Alternatively, an explanation of why a DMC is not needed                                                                            | --            |
| 37 |                                                                     |     |                                                                                                                                                                                                                                                                                                                                                                                                                  |               |
| 38 |                                                                     | 21b | Description of any interim analyses and stopping guidelines, including who will have access to these interim results and make the final decision to terminate the trial                                                                                                                                                                                                                                          | --            |
| 39 |                                                                     |     |                                                                                                                                                                                                                                                                                                                                                                                                                  |               |
| 40 |                                                                     |     |                                                                                                                                                                                                                                                                                                                                                                                                                  |               |
| 41 |                                                                     |     |                                                                                                                                                                                                                                                                                                                                                                                                                  |               |
| 42 |                                                                     |     |                                                                                                                                                                                                                                                                                                                                                                                                                  |               |
| 43 | 2                                                                   |     |                                                                                                                                                                                                                                                                                                                                                                                                                  |               |
| 44 |                                                                     |     |                                                                                                                                                                                                                                                                                                                                                                                                                  |               |
| 45 |                                                                     |     |                                                                                                                                                                                                                                                                                                                                                                                                                  |               |
| 46 |                                                                     |     |                                                                                                                                                                                                                                                                                                                                                                                                                  |               |

|    |                                 |     |                                                                                                                                                                                                                                                                                       |
|----|---------------------------------|-----|---------------------------------------------------------------------------------------------------------------------------------------------------------------------------------------------------------------------------------------------------------------------------------------|
| 1  |                                 |     |                                                                                                                                                                                                                                                                                       |
| 2  |                                 |     |                                                                                                                                                                                                                                                                                       |
| 3  |                                 |     |                                                                                                                                                                                                                                                                                       |
| 4  |                                 |     |                                                                                                                                                                                                                                                                                       |
| 5  | Harms                           | 22  | Plans for collecting, assessing, reporting, and managing solicited and spontaneously reported adverse events and other unintended effects of trial interventions or trial conduct                                                                                                     |
| 6  | Auditing                        | 23  | Frequency and procedures for auditing trial conduct, if any, and whether the process will be independent from investigators and the sponsor                                                                                                                                           |
| 7  |                                 |     |                                                                                                                                                                                                                                                                                       |
| 8  | <b>Ethics and dissemination</b> |     |                                                                                                                                                                                                                                                                                       |
| 9  | Research ethics approval        | 24  | Plans for seeking research ethics committee/institutional review board (REC/IRB) approval                                                                                                                                                                                             |
| 10 | Protocol amendments             | 25  | Plans for communicating important protocol modifications (e.g., changes to eligibility criteria, outcomes, analyses) to relevant parties (e.g., investigators, REC/IRBs, trial participants, trial registries, journals, regulators)                                                  |
| 11 | Consent or assent               | 26a | Who will obtain informed consent or assent from potential trial participants or authorised surrogates, and how (see Item 32)                                                                                                                                                          |
| 12 |                                 | 26b | Additional consent provisions for collection and use of participant data and biological specimens in ancillary studies, if applicable                                                                                                                                                 |
| 13 | Confidentiality                 | 27  | How personal information about potential and enrolled participants will be collected, shared, and maintained in order to protect confidentiality before, during, and after the trial                                                                                                  |
| 14 | Declaration of interests        | 28  | Financial and other competing interests for principal investigators for the overall trial and each study site                                                                                                                                                                         |
| 15 |                                 |     |                                                                                                                                                                                                                                                                                       |
| 16 | Access to data                  | 29  | Statement of who will have access to the final trial dataset, and disclosure of contractual agreements that limit such access for investigators                                                                                                                                       |
| 17 | Ancillary and post-trial care   | 30  | Provisions, if any, for ancillary and post-trial care, and for compensation to those who suffer harm from trial participation                                                                                                                                                         |
| 18 |                                 |     |                                                                                                                                                                                                                                                                                       |
| 19 | Dissemination policy            | 31a | Plans for investigators and sponsor to communicate trial results to participants, healthcare professionals, the public, and other relevant groups (e.g., via publication, reporting in results databases, or other data sharing arrangements), including any publication restrictions |
| 20 |                                 | 31b | Authorship eligibility guidelines and any intended use of professional writers                                                                                                                                                                                                        |
| 21 |                                 | 31c | Plans, if any, for granting public access to the full protocol, participant-level dataset, and statistical code                                                                                                                                                                       |
| 22 |                                 |     |                                                                                                                                                                                                                                                                                       |
| 23 | <b>Appendices</b>               |     |                                                                                                                                                                                                                                                                                       |
| 24 | Informed consent materials      | 32  | Model consent form and other related documentation given to participants and authorised surrogates                                                                                                                                                                                    |
| 25 |                                 |     | Annex 2                                                                                                                                                                                                                                                                               |
| 26 | Biological specimens            | 33  | Plans for collection, laboratory evaluation, and storage of biological specimens for genetic or molecular analysis in the current trial and for future use in ancillary studies, if applicable                                                                                        |
| 27 |                                 |     | Non-applicable                                                                                                                                                                                                                                                                        |
| 28 |                                 |     |                                                                                                                                                                                                                                                                                       |
| 29 |                                 |     |                                                                                                                                                                                                                                                                                       |
| 30 |                                 |     |                                                                                                                                                                                                                                                                                       |
| 31 |                                 |     |                                                                                                                                                                                                                                                                                       |
| 32 |                                 |     |                                                                                                                                                                                                                                                                                       |
| 33 |                                 |     |                                                                                                                                                                                                                                                                                       |
| 34 |                                 |     |                                                                                                                                                                                                                                                                                       |
| 35 |                                 |     |                                                                                                                                                                                                                                                                                       |
| 36 |                                 |     |                                                                                                                                                                                                                                                                                       |
| 37 |                                 |     |                                                                                                                                                                                                                                                                                       |
| 38 |                                 |     |                                                                                                                                                                                                                                                                                       |
| 39 |                                 |     |                                                                                                                                                                                                                                                                                       |
| 40 |                                 |     |                                                                                                                                                                                                                                                                                       |
| 41 |                                 |     |                                                                                                                                                                                                                                                                                       |
| 42 |                                 |     |                                                                                                                                                                                                                                                                                       |
| 43 |                                 |     |                                                                                                                                                                                                                                                                                       |
| 44 |                                 |     |                                                                                                                                                                                                                                                                                       |
| 45 |                                 |     |                                                                                                                                                                                                                                                                                       |
| 46 |                                 |     |                                                                                                                                                                                                                                                                                       |

## HOJA DE INFORMACIÓN AL PACIENTE

|                               |                                                                                                                                                                                                                                                                                                            |
|-------------------------------|------------------------------------------------------------------------------------------------------------------------------------------------------------------------------------------------------------------------------------------------------------------------------------------------------------|
| <b>Título del Estudio</b>     | Ensayo clínico aleatorizado, de superioridad, doble ciego, controlado con placebo, en fase II, para demostrar la eficacia del trasplante de microbiota fecal en la descolonización intestinal selectiva de los pacientes colonizados por <i>Klebsiella pneumoniae</i> productora de carbapenemasa tipo KPC |
| <b>Código del estudio</b>     | KAPEDIS                                                                                                                                                                                                                                                                                                    |
| <b>Promotor</b>               | Fundación para la Investigación Biomédica de Córdoba                                                                                                                                                                                                                                                       |
| <b>Investigador principal</b> | Juan José Castón Osorio                                                                                                                                                                                                                                                                                    |
| <b>Centro</b>                 | Hospital Universitario Reina Sofía de Córdoba                                                                                                                                                                                                                                                              |

### Introducción

Nos dirigimos a usted para informarle sobre un estudio de investigación en el que se le invita a participar. El estudio ha sido aprobado por un Comité de Ética de la Investigación con medicamentos y por la Agencia Española de Medicamentos y Productos Sanitarios, de acuerdo a la legislación vigente, el Real Decreto 1090/2015 de 4 de diciembre y el Reglamento Europeo 536/2014 de 16 de abril, por los que se regulan los ensayos clínicos con medicamentos.

Nuestra intención es que usted reciba la información correcta y suficiente para que pueda decidir si acepta o no participar en este estudio. Para ello lea esta hoja informativa con atención y nosotros le aclararemos las dudas que le puedan surgir.

Además, puede consultar con las personas que considere oportuno.

### Participación voluntaria

Le invitamos a participar en el estudio porque usted presenta una colonización por una bacteria multirresistente (*Klebsiella pneumoniae* productora de carbapenemasa KPC). Debe saber que su participación en este estudio es voluntaria y que puede decidir NO participar. Si decide participar, puede cambiar su decisión y retirar el consentimiento en cualquier momento, sin que por ello se altere la relación con su médico ni se produzca perjuicio alguno en su atención sanitaria.



## Objetivo del estudio

El objetivo principal del estudio es determinar si el trasplante de microbiota intestinal es eficaz para la descolonización intestinal en pacientes colonizados por *Klebsiella pneumoniae* portadora de KPC.

## Descripción del estudio

Este estudio pretende incluir un total de 120 pacientes con colonización intestinal por *Klebsiella pneumoniae* portadora de KPC. Se entiende por colonización intestinal la presencia de esta bacteria en la flora intestinal.

En todos los seres humanos habitan de forma natural millones de microorganismos, sobre todo bacterias, y fundamentalmente en el intestino. Para mantener el estado de salud de un individuo es necesario un complejo equilibrio entre estas bacterias. La edad avanzada, la depresión del sistema inmune y la toma de antibióticos son factores que alteran el ecosistema microbiológico del intestino. Se ha comprobado que la ruptura de este delicado equilibrio favorece la proliferación de bacterias causantes de enfermedad como *Clostridium difficile*.

El trasplante de microbiota intestinal consiste en la introducción de una muestra de bacterias intestinales procedentes de un donante sano en el tracto gastrointestinal de otra persona. Ello podría permitir la sustitución de las bacterias resistentes del intestino del receptor (usted) por las bacterias del intestino del donante. Para realizar el trasplante, en primer lugar se somete al receptor, al donante y a la muestra de material fecal a una serie de pruebas diagnósticas para garantizar la seguridad biológica del proceso de las partes implicadas. Seguidamente las heces se procesan en el laboratorio hasta obtener un líquido claro libre de material de desecho, que se llama sobrenadante. Por último, este sobrenadante se administra en el intestino grueso del enfermo mediante cápsulas que son ingeridas por el receptor. El fundamento para ello es que la flora intestinal normal procedente del donante sustituya a las bacterias resistentes que están presentes en su intestino.

El trasplante de microbiota intestinal está actualmente indicado en la infección por *Clostridium difficile* recurrente. Además de esta indicación, en la actualidad el trasplante de microbiota está siendo estudiado para comprobar si es eficaz para la descolonización de pacientes con colonización intestinal por bacterias resistentes a antibióticos.

Si acepta participar en nuestro estudio usted será asignado de forma aleatoria (al azar) a recibir cápsulas que contienen microbiota intestinal o placebo (una cápsula con el mismo

1  
2  
3  
4  
5  
6  
7  
8  
9  
10  
11  
12  
13  
14  
15  
16  
17  
18  
19  
20  
21  
22  
23  
24  
25  
26  
27  
28  
29  
30  
31  
32  
33  
34  
35  
36  
37  
38  
39  
40  
41  
42  
43  
44  
45  
46  
47  
48  
49  
50  
51  
52  
53  
54  
55  
56  
57  
58  
59  
60

Hoja de información al paciente y consentimiento informado – PACIENTE  
Código de protocolo: KAPEDIS  
Versión de HIP-CI paciente: 1.0 de 4 de septiembre de 2019

aspecto que la que contiene microbiota intestinal, pero que no es farmacológicamente activa y por tanto no se espera que tenga efecto). Usted tendrá un 50% de probabilidades de entrar en cada grupo del estudio. Ni el médico ni usted sabrán cuál es el tratamiento que va a recibir.

### Actividades del estudio

Su periodo de participación en el estudio será de 90 días. Esta participación se divide en dos fases, por un lado la fase de tratamiento que será el primer día tras su inclusión en el estudio y posteriormente una fase de seguimiento hasta el día 90 después del tratamiento. En la fase de tratamiento usted recibirá 4-5 cápsulas que contendrán trasplante de microbiota o placebo (una sustancia inocua y sin efecto terapéutico). El día previo a la toma de las cápsulas usted recibirá una preparación laxante (un sobre de macrogol disuelto en 125 ml de agua).

En total se realizarán 4 visitas, con la periodicidad establecida en la tabla adjunta. Se realizará una primera visita de selección (día 0), entre 7 y 10 días después la visita 1, la visita de prueba de descolonización que se realizará alrededor (entre 4 días antes o después) de los 30 días después de la visita de selección, y la visita 3 que se efectuará alrededor (entre 5 días antes o después) de los 90 días tras la visita de selección.

Estas visitas no se llevarían a cabo en caso de no participar en el estudio, aunque pueden realizarse en su domicilio sin que tenga que desplazarse al hospital si es posible y usted lo desea.

Durante el estudio se le tomarán muestras de sangre y de frotis rectal las cuales se realizarán de forma extraordinaria por su participación en el estudio.

**Tabla 1. Calendario de visitas**

| Procedimientos                  | Visita selección<br>(Día 0) | Visita 1<br>(Día 7-10) | Visita 2. Prueba de<br>descolonización<br>(Día 30 $\pm$ 4) | Visita 3<br>(Día 90 $\pm$ 5) |
|---------------------------------|-----------------------------|------------------------|------------------------------------------------------------|------------------------------|
| Consentimiento informado        | X                           |                        |                                                            |                              |
| Criterios inclusión / exclusión | X                           |                        |                                                            |                              |
| Test de embarazo                | X                           |                        |                                                            |                              |
| Aleatorización                  | X                           |                        |                                                            |                              |
| Historia clínica / Anamnesis    | X                           | X                      | X                                                          | X                            |
| Exploración física              | X                           | X                      | X                                                          | X                            |
| Analítica de sangre             | X                           | X                      | X                                                          | X                            |
| Serología                       | X                           |                        |                                                            |                              |
| Frotis rectal                   | X                           | X                      | X                                                          | X                            |
| Medicación concomitante         | X                           | X                      | X                                                          | X                            |
| Control de dispensación         | X                           |                        |                                                            |                              |
| Acontecimientos adversos        | X                           | X                      | X                                                          | X                            |

### Riesgos y molestias derivados de su participación en el estudio

El trasplante de microbiota intestinal es un procedimiento autorizado en nuestro país para el tratamiento de la diarrea recurrente por la bacteria *Clostridium difficile*. En la actualidad su uso para la descolonización intestinal por bacterias resistentes no está aprobada aún en nuestro país encontrándose en fase experimental.

En los estudios realizados hasta la fecha el trasplante de microbiota se ha mostrado como una estrategia segura, no obstante, estos no pueden excluirse por completo efectos secundarios a largo plazo.

El donante puede presentar alguna enfermedad o infección no encontrada en el momento de su estudio a la que el receptor puede estar expuesto tras el trasplante de microbiota intestinal. Todos los donantes siguen un proceso de selección exhaustivo previo a la toma de la muestra para prevenirle de ser expuesto a alguna enfermedad o infección. Aunque sería extremadamente raro, no podemos descartar por completo ese riesgo.

Algunos pacientes experimentan un breve cuadro de diarrea tras el procedimiento, que suele ceder en las primeras 24-48 horas. Otros síntomas que pueden presentarse con menor frecuencia el día de la intervención son sensación de décimas de fiebre, hinchazón, flatulencia y dolor o molestias abdominales difusas.

1  
2  
3  
4  
5  
6  
7  
8  
9  
10  
11  
12  
13  
14  
15  
16  
17  
18  
19  
20  
21  
22  
23  
24  
25  
26  
27  
28  
29  
30  
31  
32  
33  
34  
35  
36  
37  
38  
39  
40  
41  
42  
43  
44  
45  
46  
47  
48  
49  
50  
51  
52  
53  
54  
55  
56  
57  
58  
59  
60

Hoja de información al paciente y consentimiento informado – PACIENTE  
Código de protocolo: KAPEDIS  
Versión de HIP-CI paciente: 1.0 de 4 de septiembre de 2019

Para conocer más sobre los posibles efectos no deseados de este procedimiento consulte al médico del estudio.

Si usted acepta participar en el estudio se le realizarán pruebas (análisis de sangre y heces) antes de proceder al trasplante y posteriormente según el calendario de visitas expuesto en la tabla 1.

Como riesgo derivado de la extracción de sangre puede producirse un pequeño hematoma, puede haber dolor local, hemorragia y muy excepcionalmente, puede producirse infección en el punto donde se extrae la sangre.

Como participante en el estudio tiene la responsabilidad de cumplir todas las visitas y actividades del estudio. También deberá notificar cualquier evento que le suceda o cambios en la medicación en caso de urgencia, ya que no podrá modificarla por su cuenta ni tomarla junto a “plantas medicinales” sin consultar antes con el médico del estudio.

### **Posibles beneficios**

Si demostramos la hipótesis de este estudio, usted habrá contribuido a mejorar las estrategias de descolonización en otros pacientes que como usted, están colonizados por la bacteria *Klebsiella pneumoniae* portadora de KPC. Nuestra estrategia puede permitir evitar el empleo de antibióticos para la descolonización, evitando la aparición de efectos secundarios y de aparición de bacterias resistentes a los antibióticos administrados. No obstante, es posible que no obtenga ningún beneficio para su salud por participar en este estudio.

### **Advertencia relativa al embarazo**

En nuestro estudio no se incluye la participación de mujeres embarazadas. Las mujeres en edad fértil requerirán la realización de un test de gestación, el cual deberá ser negativo para su inclusión en el estudio.

Si usted es mujer, en caso de quedarse embarazada durante su participación en el estudio debe informar a su médico de inmediato para recibir la asistencia médica adecuada. En la actualidad desconocemos los efectos que puede conllevar el trasplante de microbiota fecal sobre el feto.

Hoja de información al paciente y consentimiento informado – PACIENTE  
Código de protocolo: KAPEDIS  
Versión de HIP-CI paciente: 1.0 de 4 de septiembre de 2019

1  
2  
3 En caso de producirse un embarazo, se le solicitará la recogida de datos del mismo y de datos  
4 de salud de su bebé durante los 12 meses posteriores al nacimiento. Toda la información  
5 relativa a su embarazo será tratada de acuerdo a la normativa de protección de datos vigente.  
6  
7  
8  
9

### 10 **Tratamientos alternativos**

11 Actualmente no hay una estrategia definida de forma general para la descolonización intestinal  
12 de los pacientes colonizados por bacterias resistentes. Para intentar esta descolonización se  
13 emplean distintos antibióticos de forma oral como gentamicina o colistina cuya dosis y tiempo  
14 de administración varían en cada centro. Su médico del estudio le dará más información si lo  
15 desea.  
16  
17  
18  
19

### 20 **Seguro**

21 El Promotor del estudio dispone de una póliza de seguros que se ajusta a la legislación vigente  
22 (Real Decreto 1090/2015) y que le proporcionará la compensación e indemnización en caso  
23 de menoscabo de su salud o de lesiones que pudieran producirse en relación con su  
24 participación en el estudio, siempre que no sean consecuencia de la propia enfermedad que  
25 se estudia o de la evolución propia de su enfermedad como consecuencia de la ineficacia del  
26 tratamiento.  
27  
28  
29  
30  
31

32 Si desea más información relativa a este apartado, consulte con el investigador principal del  
33 estudio de su centro.  
34  
35  
36  
37

38 Le informamos que es posible que su participación en este ensayo clínico pueda modificar las  
39 condiciones generales y particulares (cobertura) de sus pólizas de seguros (vida, salud,  
40 accidente...). Por ello le recomendamos que se ponga en contacto con su aseguradora para  
41 determinar si la participación en este estudio afectará a su actual póliza de seguros.  
42  
43  
44  
45

### 46 **Protección de datos personales**

47 El promotor se compromete al cumplimiento de la Ley Orgánica 3/2018, de 5 de diciembre,  
48 de protección de datos personales y garantía de los derechos digitales, así como el  
49 Reglamento (UE) 2016/679 del Parlamento europeo y del Consejo de 27 de abril de 2016  
50 relativo a la protección de las personas físicas en lo que respecta al tratamiento de datos  
51 personales y a la libre circulación de estos datos (Reglamento general de protección de datos).  
52  
53  
54  
55

56 Los datos recogidos para el estudio estarán identificados mediante un código, de manera que  
57 no se incluya información que pueda identificarle y sólo su médico del estudio/colaboradores  
58  
59  
60

1  
2  
3 podrá relacionar dichos datos con usted y con su historia clínica. Por lo tanto, su identidad no  
4 será revelada a persona alguna salvo excepciones en caso de urgencia médica o  
5 requerimiento legal. El tratamiento, la comunicación y la cesión de los datos de carácter  
6 personal de todos los participantes se ajustarán a lo dispuesto en esta ley.  
7  
8  
9

10  
11 El acceso a su información personal identificada quedará restringido al médico del  
12 estudio/colaboradores, a autoridades sanitarias (Agencia Española de Medicamentos y  
13 Productos Sanitarios, autoridades sanitarias extranjeras), al Comité de Ética de la  
14 Investigación y al personal autorizado por el promotor (monitores del estudio, auditores),  
15 cuando lo precisen para comprobar los datos personales, los procedimientos del estudio  
16 clínico y el cumplimiento de las normas de buena práctica clínica (siempre manteniendo la  
17 confidencialidad de la información de acuerdo a la legislación vigente).  
18  
19  
20  
21  
22

23  
24 Los datos se recogerán en un fichero de investigación responsabilidad de la institución y se  
25 tratarán en el marco de su participación en este estudio. El promotor adoptará las medidas  
26 pertinentes para garantizar la protección de su privacidad y no permitirá que sus datos se  
27 crucen con otras bases de datos que pudieran permitir su identificación.  
28  
29  
30

31  
32 De acuerdo a lo que establece la legislación de protección de datos, usted puede ejercer los  
33 derechos de acceso, modificación, oposición y cancelación de datos. También puede limitar  
34 el tratamiento de datos que sean incorrectos, solicitar una copia o que se trasladen a un  
35 tercero (portabilidad) los datos que usted ha facilitado para el estudio.  
36  
37  
38

39  
40 Para ejercitar sus derechos, dirijase al investigador principal del estudio o al Delegado de  
41 Protección de Datos del promotor en [dpd@imibic.org](mailto:dpd@imibic.org). Le recordamos que los datos no se  
42 pueden eliminar aunque deje de participar en el ensayo para garantizar la validez de la  
43 investigación y cumplir con los deberes legales y los requisitos de autorización de  
44 medicamentos. Así mismo tiene derecho a dirigirse a la Agencia de Protección de Datos si no  
45 queda satisfecho.  
46  
47  
48

49  
50 Si usted decide retirar el consentimiento para participar en este estudio, ningún dato nuevo  
51 será añadido a la base de datos, pero sí se utilizarán los que ya se hayan recogido.  
52  
53  
54

55  
56 El Investigador y el Promotor están obligados a conservar los datos recogidos para el estudio  
57 al menos hasta 25 años tras su finalización. Posteriormente, su información personal sólo se  
58 conservará por el centro para el cuidado de su salud y por el promotor para otros fines de  
59  
60

Hoja de información al paciente y consentimiento informado – PACIENTE  
Código de protocolo: KAPEDIS  
Versión de HIP-CI paciente: 1.0 de 4 de septiembre de 2019

investigación científica si usted hubiera otorgado su consentimiento y si así lo permite la ley y requisitos éticos aplicables.

Si realizáramos transferencia de sus datos codificados fuera de la UE a las entidades de nuestro grupo, a prestadores de servicios o a investigadores científicos que colaboren con nosotros, los datos del participante quedarán protegidos con salvaguardas tales como contratos u otros mecanismos establecidos por las autoridades de protección de datos. Si quiere saber más al respecto, puede contactar al Delegado de Protección de Datos del promotor en [dpd@imibic.org](mailto:dpd@imibic.org).

### **Gastos y compensación económica**

El promotor del estudio es el responsable de gestionar la financiación del mismo. Para la realización del estudio el promotor del mismo ha firmado un contrato con el médico del estudio y centro donde se va a realizar.

Ni el investigador ni el centro reciben ninguna compensación económica derivada del estudio.

Usted no tendrá que pagar por los medicamentos ni por pruebas específicas del estudio. Su participación en el estudio no le supondrá ningún gasto adicional a la práctica clínica habitual.

### **Otra información relevante**

Una descripción de este ensayo clínico estará disponible en <https://reec.aemps.es>, según exige la legislación española, así como en <https://clinicaltrials.gov>.

Cualquier nueva información referente al producto en investigación utilizado en el estudio y que pueda afectar a su disposición para participar en el estudio, que se descubra durante su participación, le será comunicada por su médico lo antes posible.

Debe saber que puede ser excluido del estudio si el promotor o los investigadores del estudio lo consideran oportuno, ya sea por motivos de seguridad, por cualquier acontecimiento adverso que se produzca por la medicación en estudio o porque consideren que no está cumpliendo con los procedimientos establecidos. En cualquiera de los casos, usted recibirá una explicación adecuada del motivo que ha ocasionado su retirada del estudio.

1  
2  
3  
4  
5  
6  
7  
8  
9  
10  
11  
12  
13  
14  
15  
16  
17  
18  
19  
20  
21  
22  
23  
24  
25  
26  
27  
28  
29  
30  
31  
32  
33  
34  
35  
36  
37  
38  
39  
40  
41  
42  
43  
44  
45  
46  
47  
48  
49  
50  
51  
52  
53  
54  
55  
56  
57  
58  
59  
60

Hoja de información al paciente y consentimiento informado – PACIENTE  
Código de protocolo: KAPEDIS  
Versión de HIP-CI paciente: 1.0 de 4 de septiembre de 2019

Al firmar la hoja de consentimiento adjunta, se compromete a cumplir con los procedimientos del estudio que se le han expuesto.

Si como participante en el estudio dejara de acudir a las visitas sin retirar el consentimiento, el promotor podrá realizar un seguimiento de usted.

Debe usted saber que es posible que su médico de Atención Primaria tenga conocimiento de su participación en este estudio.

### ¿Qué tratamiento recibiré cuando finalice el ensayo clínico?

Cuando acabe su participación recibirá el mejor tratamiento disponible y que su médico considere el más adecuado para su enfermedad, pero es posible que no se le pueda seguir administrando el producto en investigación del estudio. Por lo tanto, ni el investigador ni el promotor adquieren compromiso alguno de mantener dicho tratamiento fuera de este estudio.

### Contacto en caso de dudas

Si durante su participación tiene alguna duda o necesita obtener más información, póngase en contacto con el Dr. \_\_\_\_\_  
del servicio de \_\_\_\_\_ en el teléfono \_\_\_\_\_.



## CONSENTIMIENTO INFORMADO DEL PARTICIPANTE

**Título del estudio:** Ensayo clínico aleatorizado, de superioridad, doble ciego, controlado con placebo, en fase II, para demostrar la eficacia del trasplante de microbiota fecal en la descolonización intestinal selectiva de los pacientes colonizados por *Klebsiella pneumoniae* productora de carbapenemasa tipo KPC

**Código de protocolo:** KAPEDIS. **Versión del protocolo:** 1.0 de 4-septiembre-2019

Yo (nombre y apellidos del participante): \_\_\_\_\_

- He leído la hoja de información que se me ha entregado sobre el estudio.
- He podido hacer preguntas sobre el estudio.
- He recibido suficiente información sobre el estudio.
- He hablado con (nombre del investigador): \_\_\_\_\_
- Comprendo que mi participación es voluntaria.
- Comprendo que puedo retirarme del estudio:
  - Cuando quiera.
  - Sin tener que dar explicaciones.
  - Sin que esto repercuta en mis cuidados médicos.

Deseo que me comuniquen la información derivada de la investigación que pueda ser relevante para mi salud: SÍ  NO

Recibiré una copia firmada y fechada de este documento de consentimiento informado.  
 Presto libremente mi conformidad para participar en el estudio.

Nombre del participante:

Nombre del investigador:

Fecha: \_\_\_\_\_ / \_\_\_\_\_ / \_\_\_\_\_

Fecha: \_\_\_\_\_ / \_\_\_\_\_ / \_\_\_\_\_

Firma del participante:

Firma del investigador:

\_\_\_\_\_  
 Cuando se obtenga el CI en personas con capacidad modificada para dar su CI. Nombre del representante leal o familiar: \_\_\_\_\_ Nombre del investigador: \_\_\_\_\_

Hoja de información al paciente y consentimiento informado – PACIENTE  
 Código de protocolo: KAPEDIS  
 Versión de HIP-CI paciente: 1.0 de 4 de septiembre de 2019

Fecha: \_\_\_\_\_ / \_\_\_\_\_ / \_\_\_\_\_  
 \_\_\_\_\_ / \_\_\_\_\_ / \_\_\_\_\_

Fecha:

Firma del representante leal:

Firma del investigador:

## CONSENTIMIENTO INFORMADO DEL PACIENTE ANTE TESTIGOS

**Título del estudio:** Ensayo clínico aleatorizado, de superioridad, doble ciego, controlado con placebo, en fase II, para demostrar la eficacia del trasplante de microbiota fecal en la descolonización intestinal selectiva de los pacientes colonizados por *Klebsiella pneumoniae* productora de carbapenemasa tipo KPC

**Código de protocolo:** KAPEDIS. **Versión del protocolo:** 1.0 de 4-septiembre-2019

Yo (nombre y apellidos del testigo): \_\_\_\_\_  
 como testigo, afirmo que en mi presencia se ha informado a D/D<sup>a</sup> (nombre y apellidos del participante) \_\_\_\_\_  
 y se ha leído o le han leído la hoja de información que se le ha entregado sobre el estudio, de modo que:

- Ha podido hacer preguntas sobre el estudio.
- Ha recibido suficiente información sobre el estudio.
- Ha hablado con (nombre del investigador): \_\_\_\_\_
- Comprende que su participación es voluntaria.
- Comprende que puede retirarse del estudio:
  - Cuando quiera.
  - Sin tener que dar explicaciones.
  - Sin que esto repercuta en sus cuidados médicos.

Recibirá una copia firmada y fechada de este documento de consentimiento informado.

El participante desea que se le comunique la información derivada de la investigación que pueda ser relevante para su salud: SÍ  NO

Nombre del testigo:

Nombre del investigador:

Fecha: \_\_\_\_\_ / \_\_\_\_\_ / \_\_\_\_\_  
 \_\_\_\_\_ / \_\_\_\_\_ / \_\_\_\_\_

Fecha:

Firma del testigo:

Firma del investigador:

Hoja de información al paciente y consentimiento informado – PACIENTE  
Código de protocolo: KAPEDIS  
Versión de HIP-CI paciente: 1.0 de 4 de septiembre de 2019

1  
2  
3 El participante del estudio ha indicado que no puede leer / escribir. Un miembro del  
4 personal del estudio le ha leído el documento de consentimiento, lo ha revisado y  
5 comentado con el participante y se le ha concedido la oportunidad de hacer preguntas  
6 o consultarlo con otras personas. El testigo es una persona imparcial, ajena al estudio.  
7  
8  
9  
10  
11  
12  
13  
14  
15  
16  
17  
18  
19  
20  
21  
22  
23  
24  
25  
26  
27  
28  
29  
30  
31  
32  
33  
34  
35  
36  
37  
38  
39  
40  
41  
42  
43  
44  
45  
46  
47  
48  
49  
50  
51  
52  
53  
54  
55  
56  
57  
58  
59  
60

For peer review only

# BMJ Open

**A randomized, double-blind, placebo-controlled, phase 2, superiority trial to demonstrate the effectiveness of fecal microbiota transplantation for Selective Intestinal Decolonization of patients colonized by carbapenemase-producing *Klebsiella pneumoniae* (KAPEDIS).**

|                                 |                                                                                                                                                                                                                                                                                                                                                                                                                                                                                                                                                                                                                                |
|---------------------------------|--------------------------------------------------------------------------------------------------------------------------------------------------------------------------------------------------------------------------------------------------------------------------------------------------------------------------------------------------------------------------------------------------------------------------------------------------------------------------------------------------------------------------------------------------------------------------------------------------------------------------------|
| Journal:                        | <i>BMJ Open</i>                                                                                                                                                                                                                                                                                                                                                                                                                                                                                                                                                                                                                |
| Manuscript ID                   | bmjopen-2021-058124.R1                                                                                                                                                                                                                                                                                                                                                                                                                                                                                                                                                                                                         |
| Article Type:                   | Protocol                                                                                                                                                                                                                                                                                                                                                                                                                                                                                                                                                                                                                       |
| Date Submitted by the Author:   | 19-Feb-2022                                                                                                                                                                                                                                                                                                                                                                                                                                                                                                                                                                                                                    |
| Complete List of Authors:       | Pérez-Nadales, Elena; Maimonides Institute for Biomedical Research of Cordoba<br>Cano, Ángela; Reina Sofia University Hospital<br>Recio, Manuel; Reina Sofia University Hospital<br>Artacho, María José; Santa Ana Hospital Motril<br>Guzmán-Puche, Julia; Reina Sofia University Hospital<br>Doblas, Antonio; Reina Sofia University Hospital<br>Vidal, Elisa; Reina Sofia University Hospital<br>Natera, Clara; Reina Sofia University Hospital<br>Martínez-Martínez, Luis; Reina Sofia University Hospital<br>Torre-Cisneros, Julian; Reina Sofia University Hospital<br>Castón, Juan José; Reina Sofia University Hospital |
| <b>Primary Subject Heading</b>: | Infectious diseases                                                                                                                                                                                                                                                                                                                                                                                                                                                                                                                                                                                                            |
| Secondary Subject Heading:      | Infectious diseases                                                                                                                                                                                                                                                                                                                                                                                                                                                                                                                                                                                                            |
| Keywords:                       | INFECTIOUS DISEASES, Infection control < INFECTIOUS DISEASES, Public health < INFECTIOUS DISEASES                                                                                                                                                                                                                                                                                                                                                                                                                                                                                                                              |
|                                 |                                                                                                                                                                                                                                                                                                                                                                                                                                                                                                                                                                                                                                |

SCHOLARONE™  
Manuscripts

Bmjopen-2021-058124\_Main manuscript\_clean copy

1 A randomized, double-blind, placebo-controlled, phase 2, superiority trial to demonstrate the  
2 effectiveness of fecal microbiota transplantation for **Selective Intestinal Decolonization** of  
3 patients colonized by carbapenemase-producing **Klebsiella Pneumoniae** (KAPEDIS)

#### 4 **Running title**

5 Randomized clinical trial of fecal microbiota transplantation for decolonization of KPC-producing  
6 *Klebsiella pneumoniae*.

#### 8 **Authors**

9 Elena Pérez-Nadales<sup>1,2,3</sup>, Ángela Cano<sup>1,2,3,4</sup>, Manuel Recio<sup>2,3,4</sup>, María José Artacho<sup>5</sup>, Julia Guzmán-  
10 Puche<sup>1,2,3,6</sup>, Antonio Doblas<sup>4</sup>, Elisa Vidal<sup>1,2,3,4</sup>, Clara Natera<sup>2,3,4</sup>, Luis Martínez-Martínez<sup>1,2,3,6,7</sup>,  
11 Julián Torre-Cisneros<sup>1,2,3,4,8</sup>, Juan José Castón<sup>1,2,3,4</sup>.

#### 13 **Affiliations**

- 14 1. The Network Center for Biomedical Research in Infectious Diseases (CIBERINFEC), Instituto  
15 de Salud Carlos III (ISCIII), Madrid, Spain.
- 16 2. Spanish Network for Research in Infectious Diseases, Instituto de Salud Carlos III (ISCIII),  
17 Madrid, Spain.
- 18 3. Maimonides Biomedical Research Institute of Cordoba, Reina Sofia University Hospital,  
19 University of Cordoba (IMIBIC/HURS/UCO), Cordoba, Spain.
- 20 4. Clinical Unit of Infectious Diseases, Reina Sofía University Hospital, Cordoba, Spain.
- 21 5. Clinical Unit of Microbiology, Santa Ana Hospital Motril, Spain.
- 22 6. Clinical Unit of Microbiology, Reina Sofía University Hospital, Cordoba, Spain.
- 23 7. Department of Agricultural Chemistry, Edaphology and Microbiology, University of Cordoba,  
24 Cordoba, Spain.
- 25 8. Department of Medicine, University of Cordoba, Cordoba, Spain.

1  
2  
3 28  
4

5 29 **Keywords**

6  
7 30 fecal microbiota transplantation, selective intestinal decolonization, *Klebsiella pneumoniae*,  
8  
9 31 carbapenemase.  
10  
11

12 32

13  
14 33 **\*Corresponding author**

15  
16 34 Julián Torre-Cisneros. Clinical Unit of Infectious Diseases, Reina Sofía University Hospital (HURS);  
17  
18 35 Maimonides Biomedical Research Institute of Cordoba (IMIBIC/HURS/UCO); Department of  
19  
20 36 Medicine, University of Cordoba (UCO), Cordoba, Spain. Julian.torre.sspa@juntadeandalucia.es  
21  
22

23 37

24  
25 38 **Author ORCID IDs**

26  
27 39 Elena Pérez-Nadales: 0000-0002-6796-1813

28  
29 40 Luis Martínez-Martínez: 0000-0002-6091-4045

30  
31 41 Julián Torre-Cisneros: 0000-0002-5095-2398

32  
33 42 Juan José Castón: 0000-0002-7477-2033

34  
35 43

36  
37 44 **Word count**

38  
39 45 Abstract: 216

40  
41 46 Main text: 4,127.  
42  
43  
44  
45  
46  
47  
48  
49  
50  
51  
52  
53  
54  
55  
56  
57  
58  
59  
60

Bmjopen-2021-058124\_Main manuscript\_clean copy

1  
2  
3 48 **ABSTRACT**

4  
5 49 **Introduction:** Infections caused by carbapenemase-producing *Enterobacterales* are frequent  
6  
7 50 and associated with high rates of mortality. Intestinal carriers are at increased risk of infection  
8  
9 51 by these microorganisms. Decolonization strategies with antibiotics have not obtained  
10  
11 52 conclusive results. Fecal microbiota transplantation (FMT) could be an effective and safe  
12  
13 53 strategy to decolonize intestinal carriers of KPC-producing *Klebsiella pneumoniae* (KPC-Kp) but  
14  
15 54 this hypothesis needs evaluation in appropriate clinical trials.  
16  
17  
18  
19  
20

21 56 **Methods and analysis:** The KAPEDIS trial is a single-center, randomized, double-blind, placebo-  
22  
23 57 controlled, phase 2, superiority clinical trial of FMT for eradication of intestinal colonization by  
24  
25 58 KPC-Kp. One hundred and twenty patients with rectal colonization by KPC-Kp will be randomized  
26  
27 59 1:1 to receive encapsulated lyophilized FMT or placebo. The primary outcome is KPC-Kp  
28  
29 60 eradication at 30 days. Secondary outcomes are: (i) frequency of adverse events; (ii) changes in  
30  
31 61 KPC-Kp relative load within the intestinal microbiota at 7, 30 and 90 days, estimated by real-  
32  
33 62 time quantitative PCR analysis of rectal swab samples; and (iii) rates of persistent eradication,  
34  
35 63 KPC-Kp infection and crude mortality at 90 days. Participants will be monitored for adverse  
36  
37 64 effects throughout the intervention.  
38  
39  
40  
41  
42

43 66 **Ethics and dissemination:** Ethical approval was obtained from Reina Sofia University Hospital  
44  
45 67 Institutional Review Board (approval reference number: 2019-003808-13). Trial results will be  
46  
47 68 published in peer-reviewed journals and disseminated at national and international  
48  
49 69 conferences.  
50  
51

52 70  
53  
54 71 **Trial registration number:** Clinicaltrials.gov registration number NCT04760665.  
55  
56  
57  
58  
59  
60

1  
2  
3 74 **STRENGTHS AND LIMITATIONS OF THIS STUDY**  
4

- 5 75 1. The double-blind, randomized, placebo-controlled design will control for spontaneous KPC-  
6  
7 76 Kp decolonization.  
8  
9 77 2. A remote, centralized, automatic randomization system together with double-blinding will  
10  
11 78 be implemented to reduce sources of potential bias.  
12  
13 79 3. The trial is designed to evaluate the superiority of FMT against placebo in preventing  
14  
15 80 multidrug-resistant infections.  
16  
17 81 4. Concomitant administration of antibiotics during the follow-up period could act as  
18  
19 82 confounder.  
20  
21 83 5. The double-blind design is a strength of the study, while the single-center design is a  
22  
23 84 limitation.  
24  
25  
26  
27  
28  
29  
30  
31  
32  
33  
34  
35  
36  
37  
38  
39  
40  
41  
42  
43  
44  
45  
46  
47  
48  
49  
50  
51  
52  
53  
54  
55  
56  
57  
58  
59  
60



Bmjopen-2021-058124\_Main manuscript\_clean copy

**86 INTRODUCTION**

87 Multidrug-resistant bacteria represent an important threat to public health and  
88 particularly to vulnerable patient populations such as the elderly, the chronically ill,  
89 hospitalized patients, transplant and immunosuppressed recipients [1–3]. *Enterobacterales* are  
90 especially important from an antimicrobial resistance perspective, since they are a common  
91 cause of community-associated, as well as healthcare-associated infections. Carbapenem-  
92 resistant *Enterobacterales* (CRE) have been designated as a critical priority in the World Health  
93 Organization (WHO) Global Priority List for antimicrobial-resistant bacteria for the  
94 development of new antibiotics.

95 The gastrointestinal tract is a reservoir for antibiotic-resistant pathogens that cause  
96 disease by a variety of mechanisms. There is increasing evidence that the commensal  
97 microbiota have an indirect role in the control of pathogen invasion by stimulating host  
98 immunity in the intestines [4]. Antibiotic treatment drastically alters the composition of the  
99 microbiota, interfering with this immunological balance, and promoting selection and  
100 proliferation of antibiotic-resistant pathogens [4]. Conversely, the commensal microbiota may  
101 be manipulated to prevent or cure infections caused by pathogenic bacteria, such as  
102 *Clostridium difficile* or multidrug-resistant organisms (MDRO), including vancomycin-resistant  
103 *Enterococcus faecium* and Gram-negative Enterobacterales [4,5]. So far, the most common  
104 control strategy for prevention of CRE infection in colonized patients is selective intestinal  
105 decolonization (SDD) with oral, non-absorbable antibiotics, including colistin and  
106 aminoglycosides [6–10]. The reported decolonization rates in observational studies range  
107 between 27.5% and 71% [10,11]. However, development of resistance to decolonizing agents  
108 is frequently reported and there is a lack of randomized clinical trials (RCT) that allow adequate  
109 assessment of the effectiveness and safety of this strategy [9]. Considering these limitations,  
110 the clinical guidelines from the European Society of Clinical Microbiology and Infectious

1  
2  
3 111 Diseases and European Committee on Infection Control (ESCMID-ECIC) do not recommend  
4  
5 112 routine SDD of CRE carriers [10].  
6

7 113 Fecal microbiota transplantation is an emerging therapy for targeting and modulating  
8  
9 114 the human intestinal microbiota [12]. It has been demonstrated to be highly effective in patients  
10  
11 115 with recurrent *Clostridioides difficile* infection (CDI) and has been incorporated into an European  
12  
13 116 consensus document [13]. Promising results suggest that FMT may also be beneficial for the  
14  
15 117 management of other disorders associated with gut microbiota dysbiosis. Recently, FMT has  
16  
17 118 received attention as a potential decolonization strategy for MDRO [14–21]. So far, a single  
18  
19 119 randomized control trial (RCT) has evaluated whether oral antibiotics followed by FMT could  
20  
21 120 eradicate intestinal carriage with extended-spectrum beta-lactamase-producing  
22  
23 121 *Enterobacterales* (ESBL-E, 72% of patients) or carbapenem-resistant *Enterobacterales* (CRE, 28%  
24  
25 122 of patients) [16]. The study failed to show non-inferiority of FMT, however, there were  
26  
27 123 important limitations, including the lack of a placebo control, and failure to reach the targeted  
28  
29 124 number of patients due to legislative impediments [16]. Besides this RCT, a recent meta-analysis  
30  
31 125 evaluated five European studies (three case series and two case reports), and reported an  
32  
33 126 overall 46% successful decolonization rate at one month after FMT, with higher decolonization  
34  
35 127 rates for *P. aeruginosa* (100% decolonization in 4 cases) as compared to New Delhi metallo-  
36  
37 128 lactamase (NDM-1)-producing *Klebsiella pneumoniae* (36.4%) and ESBL-producing *Klebsiella*  
38  
39 129 *pneumoniae* (40%) [22]. In contrast, a recent prospective cohort study including 15 CRE carriers  
40  
41 130 reported 60% eradication rates at one month after FMT [20]. In this study, *Klebsiella*  
42  
43 131 *pneumoniae* was the most common species (7/15) and *blaKPC* (*Klebsiella*  
44  
45 132 *pneumoniae* carbapenemase) was the most common carbapenemase gene (9/15), followed by  
46  
47 133 *blaOXA-48* (oxacillinase-48) (5/15) and *blaNDM* (1/15) [20]. The observed differences in  
48  
49 134 effectiveness of FMT for eradication of MDRO may be explained by differences in FMT  
50  
51 135 conditions among studies, including bowel preparation before FMT, the donor, the dose, and  
52  
53 136 FMT preparation and administration procedures. Importantly, overall, studies report minor  
54  
55  
56  
57  
58  
59  
60

Bmjopen-2021-058124\_Main manuscript\_clean copy

137 adverse events in patients who received FMT for MDRO eradication, and these include vomiting,  
138 diarrhea, abdominal pain, and ileus [22,23].

139 Despite all the limitations, the available evidence suggests a potential benefit of FMT as  
140 a decolonization intervention for CRE, however this needs to be confirmed by future well-  
141 designed RCTs. We have designed a phase II, double-blind, placebo-controlled clinical trial to  
142 assess the efficacy of oral FMT capsules to eradicate colonization, with KPC carbapenemase-  
143 producing *Klebsiella pneumoniae* (KPC-Kp).

## 145 **METHODS AND ANALYSIS**

### 146 **TRIAL DESIGN AND STUDY SETTING**

147 Randomized, double-blind, placebo-controlled, phase 2, superiority clinical trial with two  
148 parallel arms: 120 patients will be randomized 1:1 to receive FMT capsules (N=60) or placebo  
149 (N=60) (**Figure 1**). Participants will be recruited from Reina Sofia University Hospital, a 1000-bed  
150 tertiary, academic, public hospital located in Cordoba, Spain. Some patients may be hospitalized  
151 at the time of recruitment and will thus be included during hospital stay. Participants who are  
152 not hospitalized or are discharged from hospital will be invited to attend the outpatient clinic.  
153 We followed SPIRIT (Standard Protocol Items: Recommendations for Interventional Trials)  
154 guidance, outlined in a 33-item checklist (**Annex 1**) and **Figure 1** [24].

#### 156 **Primary objective**

- 157 • To assess the efficacy of oral FMT capsules to eradicate intestinal colonization by KPC-  
158 producing *Klebsiella pneumoniae* at 30 days after FMT.

159

1  
2  
3 160 **Primary outcome**  
4

- 5  
6 161 • KPC-Kp eradication rate at 30 days in the intention-to-treat population, including all  
7  
8 162 randomized patients.  
9

10 163

11  
12  
13 164 **Secondary objectives**  
14

- 15  
16 165 • To evaluate the safety of FMT.  
17  
18 166 • To determine if FMT is associated with an early (7 days post-FMT) and late (30 days post-  
19  
20 167 FMT) decrease in the relative load of KPC-Kp within the intestinal microbiota.  
21  
22 168 • To evaluate if FMT is associated with persistent intestinal eradication at 3 months after  
23  
24 169 intervention.  
25  
26 170 • To study if FMT is associated with a decrease in the incidence of KPC-Kp infections at 3  
27  
28 171 months after intervention.  
29  
30 172 • To evaluate if FMT is associated with a decrease in mortality due to KPC-Kp infections at 3  
31  
32 173 months after intervention.  
33  
34 174

35  
36  
37  
38  
39 175 **Secondary outcomes**  
40

- 41 176 • Proportion of patients with adverse events during follow-up: (i) reflux following FMT  
42  
43 177 administration; (ii) intolerable gastrointestinal side effects (i.e., abdominal pain, flatulence,  
44  
45 178 vomiting, constipation, diarrhoea, or transient fever) leading to discontinuation of FMT  
46  
47 179 before completing the study; (iii) occurrence of any adverse/serious adverse effects.  
48  
49 180 • Changes in the relative load of KPC-Kp within the intestinal microbiota from day 0 (baseline)  
50  
51 181 to days 7 (visit 1), 30 (visit 2) and 90 (visit 3), estimated by quantitative real-time PCR analysis  
52  
53 182 (qPCR) of rectal swab samples (described below).  
54  
55 183 • Proportion of patients with persistent KPC-Kp eradication at 3 months of follow-up.  
56  
57 184 • Rate of KPC-Kp infections at 3 months.  
58  
59  
60

Bmjopen-2021-058124\_Main manuscript\_clean copy

- 1  
2  
3 185 • Crude mortality rate at 3 months.  
4  
5 186  
6  
7  
8 187 **Definitions**  
9  
10  
11 188 • Eradication: Negative rectal swab culture for KPC-Kp together with negative polymerase  
12  
13 189 chain reaction (PCR) test for *bla<sub>KPC</sub>* gene. If the PCR result is positive, the subject is  
14  
15 190 considered not-decolonized.  
16  
17 191 • Early decrease in intestinal KPC-Kp load: Significant reduction in the relative load of KPC-Kp  
18  
19 192 within the gut microbiota in rectal swab samples obtained at day 7 of follow-up (visit 2) in  
20  
21 193 patients receiving FMT versus placebo.  
22  
23 194 • Late decrease in intestinal KPC-Kp load: Significant reduction in the relative load of KPC-Kp  
24  
25 195 within the gut microbiota in rectal swab samples obtained at day 30 of follow-up (visit 3)  
26  
27 196 in patients receiving FMT versus placebo.  
28  
29 197 • Early decolonization: Negative rectal swab culture for KPC-Kp and negative polymerase  
30  
31 198 chain reaction (PCR) test for *bla<sub>KPC</sub>* gene within 7-10 days of intervention.  
32  
33 199 • Persistent decolonization: Negative rectal swab culture for KPC-Kp and  
34  
35 200 negative polymerase chain reaction (PCR) test for *bla<sub>KPC</sub>* gene on days 30 and 90 after the  
36  
37 201 intervention.  
38  
39 202 • KPC-Kp infection: i) Proven infection: KPC-Kp isolated from clinical specimens in the  
40  
41 203 presence of clinical signs and symptoms of infection; ii) Probable infection: presence of  
42  
43 204 clinical signs and symptoms of infection requiring treatment against KPC-Kp at the  
44  
45 205 discretion of the attending physician, without isolation of KPC-Kp from clinical specimens.  
46  
47 206 • Crude mortality: All-cause mortality during follow-up.  
48  
49 207 • Intention-To-Treat (ITT) population: all randomized patients.  
50  
51  
52  
53  
54  
55  
56  
57  
58  
59  
60

- 1  
2  
3 208 • Per protocol population (PPP): Patients who meet the following criteria: (i) having been  
4  
5 209 randomized; (ii) complete data for the primary objective; (iii) not having received  
6  
7 210 antibiotics between randomization and visit 3.  
8  
9  
10 211 • Microbiologically evaluable population (PME): patients in whom all rectal colonization  
11  
12 212 studies have been performed during follow-up.  
13  
14  
15 213

#### 214 **Patient eligibility criteria**

##### 215 Inclusion criteria:

- 216 • Adult current or previous patients at Reina Sofía University Hospital with a positive rectal  
217 swab for KPC-Kp within one week before randomization.  
218 • The participant or legal representative must be able to provide written informed consent.  
219 • Absence of KPC-Kp clinical samples at the time of informed consent and in the previous  
220 month.  
221

##### 222 Exclusion criteria:

- 223 • Terminal illness or life expectancy of 3 months or less.  
224 • Pregnancy or breastfeeding.  
225 • Inability/unwillingness to orally ingest study medication.  
226 • Dysphagia and aspiration disorders.  
227 • A history of colectomy, colostomy, or ileostomy.  
228 • Patients who have been treated with antibiotics within 30 days prior to consent.  
229 • Absolute neutrophil count < 500/mm<sup>3</sup>.  
230 • Planned myelosuppressive chemotherapy within 30 days of randomization, i.e.  
231 dexamethasone, chemotherapy against solid tumors or prior to hematopoietic stem cell  
232 transplant (HSCT).

Bmjopen-2021-058124\_Main manuscript\_clean copy

- 233 • HSCT within 30 days prior to consent.
- 234 • Clinical symptoms and signs of mucositis.
- 235 • Major abdominal surgery within the upcoming 30 days.
- 236 • Patients with Giannella Risk Score > 12 puntos [25].
- 237 • Selective Digestive Decolonization with oral antibiotics within 3 months prior to
- 238 randomization.
- 239 • Severe food allergy.

240

## 241 Donor selection

### 242 General considerations

243 Donor selection and screening criteria for FMT is not currently standardized, showing variability  
244 among studies. In this RCT, we will use the exclusion criteria and conduct the microbiological  
245 studies suggested by García-García de Paredes *et al.* [26] and Huttner *et al.* [16]. To ensure  
246 double-blinding, only donors not related to the patients will be selected. This strategy has been  
247 shown to be safe and effective in studies where FMT was used as a treatment for *C. difficile*  
248 infection [27,28]. Initially, an interview and a questionnaire specifically designed for this purpose  
249 (**Supplementary Tables S1 and S2**) will be carried out with the potential donor to identify the  
250 risk of diseases, especially those that may go unnoticed due to the unavailability of specific or  
251 sensitive diagnostic tests. Subsequently, a microbiological screening of the donor's blood and  
252 faeces as well as nasopharyngeal screening for Sars-CoV-2 will be performed on valid donors  
253 (**Supplementary Table S3**). Based on expert recommendations, the pre-donation study will be  
254 carried out no longer than 4 weeks before donation [13]. This donor screening will be valid for  
255 two months after the first donation. After this period, microbiological screening will be  
256 repeated. If the same donor is required for a new donation period, the screening by  
257 questionnaire and all microbiological tests will be repeated.

1  
2  
3 258 Donor inclusion criteria  
4

- 5 259 • To be aged between 18 and 60 years.  
6  
7 260 • To be in good health without significant past medical history.  
8  
9 261 • To have a normal body weight (body mass index between 20 and 25 kg/m<sup>2</sup>).  
10  
11 262 • To have a stool with a normal appearance.  
12  
13 263 • To have an average stool frequency (1-3/day).  
14  
15 264 • Not to have an acute or chronic digestive disorder.  
16  
17  
18  
19

20 265 Donor exclusion criteria  
21

- 22 266 • Infectious disease tests: HIV infection, hepatitis B and C, risk of transmission of HIV in the  
23 267 last 12 months, hepatitis B and C, risky sexual behaviours, use of illicit drugs, tattoos or  
24 268 piercings in the previous six months, current or prior history of stay in prison, current  
25 269 communicable disease, risk factors for Creutzfeldt-Jakob disease, travel in the last six  
26 270 months to countries with endemic diarrheal diseases or high risk of traveller's diarrhoea,  
27 271 history of *C. difficile* diarrhoea.  
28  
29 272 • Gastrointestinal comorbidities: inflammatory bowel disease, irritable bowel syndrome,  
30 273 chronic constipation or chronic diarrhoea, history of gastrointestinal malignancy or  
31 274 polyposis.  
32  
33 275 • Factors that can alter the intestinal microbiota: use of antibiotics in the last three months,  
34 276 use of immunosuppressants, glucocorticoids, calcineurin inhibitors, biological agents, use of  
35 277 antineoplastic drugs.  
36  
37 278 • Specific to the receptor: recent ingestion of an allergen to which the receptor is allergic.  
38  
39 279 Others: previous major surgery of the digestive system, metabolic syndrome, diabetes  
40 280 mellitus, autoimmune diseases, connective tissue diseases, atopic diseases (asthma,  
41 281 eczema, eosinophilic pathologies of the gastrointestinal tract), chronic pain syndromes  
42 282 (fibromyalgia, chronic fatigue syndrome).  
43  
44  
45  
46  
47  
48  
49  
50  
51  
52  
53  
54  
55  
56  
57  
58  
59  
60



Bmjopen-2021-058124\_Main manuscript\_clean copy

283

284 **Microbiological studies**

285 Rectal swab samples will be analysed for the presence of CRE, using both culture on  
286 selective chromogenic agar plates (CHROMID® CARBA, bioMérieux, Marcy-l'Étoile, France), and  
287 quantitative real-time PCR.

288 For bacteria grown on culture, identification will be performed using MALDI- TOF mass  
289 spectrometry (Bruker, Germany) and carbapenemase production will be evaluated by a multiple  
290 strategy: (1) Antimicrobial susceptibility testing, with a first step using the commercial system  
291 MicroScan WalkAway and NC53 broth microdilution panels (Beckman Coulter, USA), and a  
292 second step, when a KPC-producing *K. pneumoniae* is identified, determining the Minimal  
293 Inhibitory Concentrations (MICs) of ertapenem, imipenem, meropenem and other relevant  
294 agents (including ceftolozane-tazobactam, ceftazidime-avibactam, imipenem-relebactam and  
295 meropenem-vaborbactam cefiderocol, fosfomycin, colistin, eravacycline) using EUMDROXF  
296 microdilution panels (Sensititre™, Thermofisher, USA); clinical categories will be defined  
297 according to EUCAST breakpoints; (2) the Modified Carbapenem Inactivation Method, using  
298 meropenem discs [29]; (3) an immunochromatography test for the independent identification  
299 of OXA-48-like, KPC, NDM, imipenemase (IMP) and Verona integron-encoded metallo-beta-  
300 lactamase (VIM) families of carbapenemases (NG-Test CARBA 5; NG Biotech, Guipry, France) and  
301 (4) conventional PCR for detection of the complete *blaKPC* gene, complemented with  
302 sequencing of the two DNA strands of corresponding amplicon when a positive result is  
303 obtained.

304 Quantification of the intestinal load of *blaKPC* gene in rectal swabs will be performed by  
305 quantitative real-time PCR. The load will be calculated relative to the total bacterial population  
306 (represented by the 16S rRNA gene) using the  $\Delta\Delta C_t$  method and pure cultures of KPC-producing  
307 *K. pneumoniae* as reference standards, as described in [30,31].

308

309 **Interventions**310 Trial interventions

311 Patients will be randomised 1:1 to receive oral capsules containing FMT or placebo.  
312 Mikrobiomik Healthcare Company S.L. (Vizcaya, Spain) will supply the FMT product (MBK-01),  
313 which consists of lyophilised microbiota encapsulated in hypromellose capsules (size 0), with a  
314 median mass of 250 g per capsule. Treatment will consist of 4 capsules, containing 1 g of  
315 lyophilized microbiota with  $\geq 2 \times 10^{11}$  total bacterial cells, obtained from a unique batch of  
316 lyophilised microbiota. Each batch of microbiota will be obtained from a minimum of 50 g  
317 donor feces, based on previous studies supporting the efficacy of this dosing for treatment of  
318 *Clostridioides difficile* infection [32]. Participants in the placebo arm will receive 4 capsules  
319 containing microcrystalline cellulose with the same shape, size and weight. The company will  
320 also supply the empty capsules to which the placebo will be added at the Pharmacy Service in  
321 our hospital. Capsules will be stored, with desiccant, at a temperature of  $5 \pm 3^\circ\text{C}$ , until they are  
322 dispensed. Mikrobiomik Healthcare Company will guarantee the traceability of the capsules  
323 and a record will be made of their storage, dispensing and destruction. Treatment will be  
324 dispensed to trial participants in presence of a member of the research team in a single dose  
325 in one day.

326

327 Concomitant care and interventions

328 Patients will fast for 12 hours and will receive a laxative preparation (one macrogol 3350,  
329 Movicol 13.8 g<sup>®</sup> sachet dissolved in 125 ml water) the day before study intervention. The  
330 concomitant use of systemic antibiotics with activity against KPC-Kp at the time of intervention  
331 will not be allowed. Administration of these antibiotics during the study will be considered a  
332 proven or probable infection. During the follow-up period, administration of other  
333 decolonization guidelines will not be allowed either. Other non-excluded drugs will be allowed.

Bmjopen-2021-058124\_Main manuscript\_clean copy

334

335 **Assignment of interventions**

336 Allocation to treatment arms will be performed using a centralized, web-based  
337 automated randomization system, integrated with the electronic case report file (eCRF), and  
338 will be hosted by Maimonides Institute for Biomedical Research of Cordoba (Cordoba, Spain).  
339 After the patient's enrolment is confirmed, the randomization specialist will assign a computer-  
340 generated random number to each patient. The randomization data will be sent to a designated  
341 mailbox, and the responsible nurse will collect the treatment from the pharmacy at the hospital  
342 according to the assigned results. A double-blinded design will be used in this study for the  
343 physicians and statistical specialists, and patients and research assistants. However, the  
344 pharmacist will know the group of each patient. The allocation of the participants' treatment  
345 may be revealed at the end of the data analysis.

346

347 **Evaluation during and after treatment**

348 All patients will be followed for 90 days ( $\pm 5$  days) after the intervention or until death.  
349 Four follow-up visits will be scheduled for all participants at day 0 (baseline), day 7–10 (visit 1);  
350 day 30 $\pm$ 4 (visit 2), and day 90 $\pm$ 5 (visit 3) after end of intervention. The procedures that will be  
351 performed at each visit are indicated in **Figure 1**. A rectal swab sample will be obtained at each  
352 visit for colonization studies and quantification of KPC-Kp load by qPCR (see below). If a  
353 participant fails to be present at a scheduled visit, all attempts to contact them and any  
354 retrieved information will be recorded. A minimum of three documented contact attempts via  
355 phone calls will be performed, on separate occasions. All data collected will be included in an  
356 electronic database specifically designed for this study, with password-protected user  
357 authentication. To ensure the quality of the data, independent audits from investigators and  
358 sponsors may be carried out at any moment of the study.

1  
2  
3 359  
4  
56 360 **Adverse effects**  
7

8 361 Adverse effects will be recorded and reported as part of routine follow-up. All events  
9  
10 362 fulfilling the criteria of a serious adverse event that occur during the period of study will be  
11  
12 363 reported to the promoter within 24 hours post event occurrence. An insurance policy will be  
13  
14 364 contracted to cover any harm from trial participation.  
15  
16

17  
18 365  
1920 366 **Sample size calculation**  
21

22  
23 367 Sample size calculation was performed with G\*Power 3.1 program  
24  
25 368 (<https://gpower.software.informer.com/3.1/>), assuming the following estimates: 90% power;  
26  
27 369 5% alpha error; decolonization rate at 30 days of 30% in the control group based on a recent  
28  
29 370 metanalysis reporting CRE colonization rates of 76.7% (95% confidence interval 64%-81.8%) at  
30  
31 371 1 month in the absence of intervention [11]; decolonization rate of 60% in the experimental  
32  
33 372 group, based on a recently published study [18]; 1:1 treatment to placebo ratio; superiority  
34  
35 373 considered if the confidence interval lower bound for the difference between decolonization  
36  
37 374 rates in the experimental and control groups is greater than 5%; and expected informed  
38  
39 375 consent rate of 40%. With these considerations, the sample size results in 112 patients. We  
40  
41 376 added 7% more patients in order to account for possible loss to follow-up, resulting in a final  
42  
43 377 sample size of 120 patients (60 patients in the experimental group and 60 patients in the  
44  
45 378 control group). To reach the sample size, we will perform active surveillance of patients with  
46  
47 379 KPC-Kp isolated from microbiological samples in our hospital.  
48  
49

50  
51  
52 380  
53  
54  
55  
56  
57  
58  
59  
60

Bmjopen-2021-058124\_Main manuscript\_clean copy

381 **Withdrawal from study**

382 In accordance with the Declaration of Helsinki, patients have the right to withdraw from  
383 the study at any time and for any reason, communicating this decision personally or through  
384 their representative. The study withdrawal criteria will be the following: a) at the request of the  
385 patient, through withdrawal of informed consent; b) when the patient no longer complies with  
386 protocol indications (protocol deviation); c) as a result of any adverse event, regardless of its  
387 intensity, at the discretion of the investigator; d) when for any reason the treatment is no longer  
388 safe for the patient; e) as a result of an administrative decision taken by the researchers,  
389 sponsor, or regulatory authority; f) as a result of loss of contact during follow-up. If a patient is  
390 withdrawn from the trial prematurely, the investigator will register the main reason for the  
391 withdrawal in the Clinical Research File. Whenever necessary, the patient will continue to be  
392 followed, according to the standard protocols for treatment of their pathology, at the discretion  
393 of the responsible physician.

395 **Statistical analysis**

396 Frequencies and percentages of categorical variables, and median and interquartile  
397 ranges of continuous variables will be described. Comparisons will be performed using Chi-  
398 square or Fisher's test for categorial variables, and Student's T or Mann-Whitney U test for  
399 normally and not-normally distributed continuous variables, respectively.

400 The absolute difference in the percentages of decolonization between the patients in  
401 the experimental and control groups, and its 95% confidence interval, will be calculated.  
402 Clinically significant superiority will be considered if the 95% confidence interval lower bound is  
403 greater than 5%. For the primary and secondary endpoints, the main analyses will be carried out  
404 in the intention-to-treat (ITT) population. Then, an analysis will also be carried out in the per-

1  
2  
3 405 protocol (PP) population (see definitions). All analyses will be performed using IBM SPSS  
4  
5 406 Statistics software.

6  
7 407  
8  
9

## 10 408 **ETHICS AND DISSEMINATION**

11  
12  
13 409 The study is funded by Instituto de Salud Carlos III (Science and Innovation Ministry,  
14  
15 410 Spanish government). It was authorized and approved by the ethical review board. Consent to  
16  
17 411 participate will be obtained from all participants prior to the start of the trial by physicians  
18  
19 412 included in our research team. The informed consent is provided as **Annex 2**. All data will be  
20  
21 413 anonymized. The study is being conducted in compliance with the protocol, regulatory  
22  
23 414 requirements, International Council of Harmonization (ICH) E6 Good Clinical Practice and the  
24  
25 415 ethical principles of the latest version of the Declaration of Helsinki, as adopted by the World  
26  
27 416 Medical Association. Each substantial protocol amendment will be notified for approval to the  
28  
29 417 relevant ethics committee(s) prior to implementation. The trial is registered with  
30  
31 418 ClinicalTrials.gov as NCT04760665 (February 18, 2021). All data collected will be kept strictly  
32  
33 419 confidential and in accordance with all relevant legislation on control and protection of personal  
34  
35 420 information. The participants will be identified on documentation by a unique ID number, not  
36  
37 421 by name, in agreement with the European Regulation on data protection (EU 2016/679). All  
38  
39 422 study-related information will be stored securely. The final results will be publicly disseminated  
40  
41 423 regardless of the study outcomes. The results of this study will be published in peer-reviewed  
42  
43 424 journals, as well as national and international conferences.  
44  
45  
46  
47  
48

49 425

## 50 51 52 426 **Patient and public involvement**

53  
54 427 Neither patients nor public authorities have been involved in the development of this  
55  
56 428 study protocol.  
57  
58

59 429  
60

Bmjopen-2021-058124\_Main manuscript\_clean copy

**DISCUSSION**

In recent years there has been a significant increase in the frequency of infections caused by carbapenem-producing *Enterobacterales* (CRE). These infections are associated with high mortality rates as a result of the difficulty in initiating effective empirical treatment and the limited therapeutic alternatives available for targeted treatment [33,34]. Rectal colonization with CRE has previously been identified as an important risk factor for the development of subsequent CRE infection [9,25,35,36]. This situation has promoted efforts to prevent the acquisition and spread of these bacteria, including development of novel decolonization strategies.

The utility of fecal microbiota transplantation (FMT) for gut decolonization of multidrug resistant organisms has been explored in several case reports, one prospective observational cohort and one RCT, summarized in a number of systematic reviews and metanalysis [20,22,23,37,38]. The only RCT, conducted by the R-GNOSIS study group, tested the efficacy of frozen capsulized FMT following a 5-day course of oral antibiotics in 39 carriers of CRE [16]. The desirability of pre-FMT antibiotic therapy in the context of MDRO decolonization is unclear. Firstly, the administration of antibiotics renders it very difficult to unravel the independent contributions of antibiotics and FMT to CRE decolonization. Secondly, pre-clinical studies with mouse models suggest that antibiotic pre-conditioning may improve the engraftment of specific taxa but not the overall engraftment of donor microbiota in the recipient mice [39,40]. Bar-Yoseph *et al* [20] reported that the use of antibiotics in the post-FMT period interfered with FMT engraftment among CRE-colonized recipients [20].

Methods for FMT delivery include colonoscopy, nasoduodenal tub, colonic transendoscopic enteral tubing or oral capsules [13,41,42]. In this RCT, patients will be receiving FMT based on lyophilized oral capsules, which have been proven non-inferior to colonoscopy for the treatment of recurrent CDI and which also have higher acceptance by patients [43]. Further, patients with CRE colonization who receive oral capsulized FMT achieved high

1  
2  
3 456 eradication success (60%) at one month [20]. In addition, using lyophilized preparations  
4  
5 457 facilitates capsule handling and stability, making it more feasible in hospital routine.  
6

7 458       Regarding the amount of starting stool material, the European Consensus Conference  
8  
9 459 on Faecal Microbiota Transplantation in Clinical Practice for the treatment of *Clostridium*  
10  
11 460 *difficile* infection (CDI) recommends a minimum of 30 g for the treatment of recurrent *CDI* [13].  
12  
13 461 Nevertheless, the optimal dose in FMT remains unclear since no randomized trials have  
14  
15 462 compared different amounts of faecal matter so far. In the present RCT, the capsules with the  
16  
17 463 lyophilized FMT material will be provided by an external company, which has been legally  
18  
19 464 authorized for production of the FMT capsules by the Spanish Agency for Medications and  
20  
21 465 Healthcare Products (AEMPS). The company will guarantee that each treatment, consisting of a  
22  
23 466 batch of 4 capsules, will contain a minimum of  $2 \times 10^{11}$  total bacterial cells obtained from a  
24  
25 467 minimum of 30 g of feces.  
26  
27  
28  
29

30 468       The overall aim of this RCT is to evaluate the efficacy and safety of FMT for sustained  
31  
32 469 eradication of CRE without using antibiotics that could impact the viability of the FMT content  
33  
34 470 or confound results. It has been designed with placebo control to allow estimation of the  
35  
36 471 contribution of spontaneous decolonization to CRE eradication. If the efficacy and safety of FMT  
37  
38 472 are proven, FMT may be considered a better approach for decolonization of gut MDRO than  
39  
40 473 selective antibiotics decolonization, with lower ecological impact, and potentially reducing the  
41  
42 474 risk of subsequent infections. A limitation of our study is that immunocompromised patients  
43  
44 475 have been excluded. While there is increasing evidence of the beneficial effect of FMT for this  
45  
46 476 patient population [44], given the single-center nature of this RCT, they would be insufficiently  
47  
48 477 represented to obtain statistically significant results that could justify their inclusion.  
49  
50  
51

52 478

## 55 479 REFERENCES

56  
57  
58 480 1     Aguado JM, Silva JT, Fernández-Ruiz M, *et al.* Management of multidrug resistant Gram-  
59  
60



## Bmjopen-2021-058124\_Main manuscript\_clean copy

- 1  
2  
3 481 negative bacilli infections in solid organ transplant recipients: SET/GESITRA-SEIMC/REIPI  
4  
5 482 recommendations. *Transplant. Rev.* 2018;**32**:36–57. doi:10.1016/j.trre.2017.07.001  
6  
7 483 2 Pérez-Nadales E, Gutiérrez-Gutiérrez B, Natera AM, *et al.* Predictors of mortality in solid  
8  
9 484 organ transplant recipients with bloodstream infections due to carbapenemase-  
10  
11 485 producing Enterobacterales: The impact of cytomegalovirus disease and lymphopenia.  
12  
13 486 *Am J Transplant* 2020;**20**:1629–41. doi:10.1111/ajt.15769  
14  
15  
16 487 3 van Duin D, Doi Y. The global epidemiology of carbapenemase-producing  
17  
18 488 Enterobacteriaceae. *Virulence.* 2017;**8**:460–9. doi:10.1080/21505594.2016.1222343  
19  
20  
21 489 4 Buffie CG, Pamer EG. Microbiota-mediated colonization resistance against intestinal  
22  
23 490 pathogens. *Nat. Rev. Immunol.* 2013;**13**:790–801. doi:10.1038/nri3535  
24  
25  
26 491 5 Quraishi MN, Widlak M, Bhala N, *et al.* Systematic review with meta-analysis: the  
27  
28 492 efficacy of faecal microbiota transplantation for the treatment of recurrent and  
29  
30 493 refractory *Clostridium difficile* infection. *Aliment. Pharmacol. Ther.* 2017;**46**:479–93.  
31  
32 494 doi:10.1111/apt.14201  
33  
34 495 6 Saidel-Odes L, Polachek H, Peled N, *et al.* A randomized, double-blind, placebo-  
35  
36 496 controlled trial of selective digestive decontamination using oral gentamicin and oral  
37  
38 497 polymyxin E for eradication of carbapenem-resistant *Klebsiella pneumoniae* carriage.  
39  
40 498 *Infect Control Hosp Epidemiol* 2012;**33**:14–9. doi:10.1086/663206  
41  
42  
43 499 7 Oren I, Sprecher H, Finkelstein R, *et al.* Eradication of carbapenem-resistant  
44  
45 500 Enterobacteriaceae gastrointestinal colonization with nonabsorbable oral antibiotic  
46  
47 501 treatment: A prospective controlled trial. *Am J Infect Control* 2013;**41**:1167–72.  
48  
49 502 doi:10.1016/j.ajic.2013.04.018  
50  
51  
52 503 8 Lübbert C, Fauchoux S, Becker-Rux D, *et al.* Rapid emergence of secondary resistance to  
53  
54 504 gentamicin and colistin following selective digestive decontamination in patients with  
55  
56 505 KPC-2-producing *Klebsiella pneumoniae*: a single-centre experience. *Int J Antimicrob*  
57  
58 506 *Agents* 2013;**42**:565–70. doi:10.1016/J.IJANTIMICAG.2013.08.008  
59  
60

- 1  
2  
3 507 9 Machuca I, Gutiérrez-Gutiérrez B, Pérez Cortés S, *et al.* Oral decontamination with  
4  
5 508 aminoglycosides is associated with lower risk of mortality and infections in high-risk  
6  
7 509 patients colonized with colistin-resistant, KPC-producing *Klebsiella pneumoniae*. *J*  
8  
9 510 *Antimicrob Chemother* 2016;**71**:3242–9. doi:10.1093/jac/dkw272
- 11 511 10 Tacconelli E, Mazzaferri F, de Smet AM, *et al.* ESCMID-EUCIC clinical guidelines on  
12  
13 512 decolonization of multidrug-resistant Gram-negative bacteria carriers. *Clin Microbiol*  
14  
15 513 *Infect* 2019;**0**. doi:10.1016/j.cmi.2019.01.005
- 16  
17 514 11 Bar-Yoseph H, Hussein K, Braun E, *et al.* Natural history and decolonization strategies  
18  
19 515 for ESBL/carbapenem-resistant Enterobacteriaceae carriage: systematic review and  
20  
21 516 meta-analysis. *J Antimicrob Chemother* 2016;**71**:2729–39. doi:10.1093/jac/dkw221
- 22  
23 517 12 Allegretti JR, Mullish BH, Kelly C, *et al.* The evolution of the use of faecal microbiota  
24  
25 518 transplantation and emerging therapeutic indications. *Lancet* 2019;**394**:420–31.  
26  
27 519 doi:10.1016/S0140-6736(19)31266-8
- 28  
29 520 13 Cammarota G, Ianiro G, Tilg H, *et al.* European consensus conference on faecal  
30  
31 521 microbiota transplantation in clinical practice. *Gut* 2017;**66**:569–80.  
32  
33 522 doi:10.1136/GUTJNL-2016-313017
- 34  
35 523 14 Seong H, Lee SK, Cheon JH, *et al.* Fecal Microbiota Transplantation for multidrug-  
36  
37 524 resistant organism: Efficacy and Response prediction. *J Infect* 2020;**81**:719–25.  
38  
39 525 doi:10.1016/j.jinf.2020.09.003
- 40  
41 526 15 Saïdani N, Lagier JC, Cassir N, *et al.* Faecal microbiota transplantation shortens the  
42  
43 527 colonisation period and allows re-entry of patients carrying carbapenamase-producing  
44  
45 528 bacteria into medical care facilities. *Int J Antimicrob Agents* 2019;**53**:355–61.  
46  
47 529 doi:10.1016/j.ijantimicag.2018.11.014
- 48  
49 530 16 Huttner BD, de Lastours V, Wassenberg M, *et al.* A 5-day course of oral antibiotics  
50  
51 531 followed by faecal transplantation to eradicate carriage of multidrug-resistant  
52  
53 532 Enterobacteriaceae: a randomized clinical trial. *Clin Microbiol Infect* 2019;**25**:830–8.  
54  
55  
56  
57  
58  
59  
60

## Bmjopen-2021-058124\_Main manuscript\_clean copy

- 1  
2  
3 533 doi:10.1016/J.CMI.2018.12.009  
4  
5 534 17 Dinh A, Fessi H, Duran C, *et al.* Clearance of carbapenem-resistant Enterobacteriaceae  
6  
7 535 vs vancomycin-resistant enterococci carriage after faecal microbiota transplant: a  
8  
9 536 prospective comparative study. *J Hosp Infect* 2018;**99**:481–6.  
10  
11 537 doi:10.1016/j.jhin.2018.02.018  
12  
13  
14 538 18 Bilinski J, Grzesiowski P, Sorensen N, *et al.* Fecal Microbiota Transplantation in Patients  
15  
16 539 With Blood Disorders Inhibits Gut Colonization With Antibiotic-Resistant Bacteria:  
17  
18 540 Results of a Prospective, Single-Center Study. *Clin Infect Dis* 2017;**65**:364–70.  
19  
20 541 doi:10.1093/cid/cix252  
21  
22  
23 542 19 Battipaglia G, Malard F, Rubio MT, *et al.* Fecal microbiota transplantation before or  
24  
25 543 after allogeneic hematopoietic transplantation in patients with hematologic  
26  
27 544 malignancies carrying multidrug-resistance bacteria. *Haematologica* 2019;**104**:1682–8.  
28  
29 545 doi:10.3324/haematol.2018.198549  
30  
31  
32 546 20 Bar-Yoseph H, Carasso S, Shklar S, *et al.* Oral Capsulized Fecal Microbiota  
33  
34 547 Transplantation for Eradication of Carbapenemase-producing Enterobacteriaceae  
35  
36 548 Colonization With a Metagenomic Perspective. *Clin Infect Dis* 2021;**73**:e166–75.  
37  
38 549 doi:10.1093/cid/ciaa737  
39  
40  
41 550 21 Singh R, Groot PF de, Geerlings SE, *et al.* Fecal microbiota transplantation against  
42  
43 551 intestinal colonization by extended spectrum beta-lactamase producing  
44  
45 552 Enterobacteriaceae: a proof of principle study. *BMC Res Notes* 2018;**11**.  
46  
47 553 doi:10.1186/S13104-018-3293-X  
48  
49  
50 554 22 Tavoukjian V. Faecal microbiota transplantation for the decolonization of antibiotic-  
51  
52 555 resistant bacteria in the gut: a systematic review and meta-analysis. *J Hosp Infect*  
53  
54 556 2019;**102**:174–88. doi:10.1016/J.JHIN.2019.03.010  
55  
56  
57 557 23 Saha S, Tariq R, Tosh PK, *et al.* Faecal microbiota transplantation for eradicating  
58  
59 558 carriage of multidrug-resistant organisms: a systematic review. *Clin. Microbiol. Infect.*  
60

- 1  
2  
3 559 2019;**25**:958–63. doi:10.1016/j.cmi.2019.04.006  
4  
5 560 24 Chan A-W, Tetzlaff JM, Altman DG, *et al.* SPIRIT 2013 Statement: Defining Standard  
6  
7 561 Protocol Items for Clinical Trials. *Ann Intern Med* 2013;**158**:200. doi:10.7326/0003-  
8  
9 562 4819-158-3-201302050-00583  
10  
11  
12 563 25 Cano A, Gutiérrez-Gutiérrez B, Machuca I, *et al.* Risks of Infection and Mortality among  
13  
14 564 Patients Colonized with *Klebsiella pneumoniae* Carbapenemase-Producing K.  
15  
16 565 *pneumoniae*: Validation of Scores and Proposal for Management. *Clin Infect Dis*  
17  
18 566 2018;**66**:1204–10. doi:10.1093/cid/cix991  
19  
20  
21 567 26 García-García-de-Paredes A, Rodríguez-de-Santiago E, Aguilera-Castro L, *et al.*  
22  
23 568 Trasplante de microbiota fecal. *Gastroenterol Hepatol* 2015;**38**:123–34.  
24  
25 569 doi:10.1016/J.GASTROHEP.2014.07.010  
26  
27  
28 570 27 Youngster I, Russell GH, Pindar C, *et al.* Oral, Capsulized, Frozen Fecal Microbiota  
29  
30 571 Transplantation for Relapsing *Clostridium difficile* Infection. *JAMA - J Am Med Assoc*  
31  
32 572 2014;**312**:1772–8. doi:10.1001/jama.2014.13875  
33  
34 573 28 van Nood E, Vrieze A, Nieuwdorp M, *et al.* Duodenal Infusion of Donor Feces for  
35  
36 574 Recurrent *Clostridium difficile*. *N Engl J Med* 2013;**368**:407–15.  
37  
38 575 doi:10.1056/nejmoa1205037  
39  
40  
41 576 29 VM P, PJ S, DR L, *et al.* Modified Carbapenem Inactivation Method for Phenotypic  
42  
43 577 Detection of Carbapenemase Production among Enterobacteriaceae. *J Clin Microbiol*  
44  
45 578 2017;**55**:2321–33. doi:10.1128/JCM.00193-17  
46  
47  
48 579 30 Lerner A, Adler A, Abu-Hanna J, *et al.* Spread of KPC-producing carbapenem-resistant  
49  
50 580 *Enterobacteriaceae*: The importance of super-spreaders and rectal KPC concentration.  
51  
52 581 *Clin Microbiol Infect* 2015;**21**:470.e1-470.e7. doi:10.1016/j.cmi.2014.12.015  
53  
54 582 31 Ramos-Ramos JC, Lázaro-Perona F, Arribas JR, *et al.* Proof-of-concept trial of the  
55  
56 583 combination of lactitol with *Bifidobacterium bifidum* and *Lactobacillus acidophilus* for  
57  
58 584 the eradication of intestinal OXA-48-producing *Enterobacteriaceae*. *Gut Pathog*

## Bmjopen-2021-058124\_Main manuscript\_clean copy

- 1  
2  
3 585 2020;**12**. doi:10.1186/s13099-020-00354-9  
4  
5 586 32 Reigadas E, Bouza E, Olmedo M, *et al*. Faecal microbiota transplantation for recurrent  
6  
7 587 Clostridioides difficile infection: experience with lyophilized oral capsules. *J Hosp Infect*  
8  
9 588 2020;**105**:319–24. doi:10.1016/j.jhin.2019.12.022  
10  
11 589 33 Gutiérrez-Gutiérrez B, Salamanca E, de Cueto M, *et al*. Effect of appropriate  
12  
13 590 combination therapy on mortality of patients with bloodstream infections due to  
14  
15 591 carbapenemase-producing *Enterobacteriaceae* (INCREMENT): a retrospective cohort  
16  
17 592 study. *Lancet Infect Dis* 2017;**17**:726–34. doi:10.1016/S1473-3099(17)30228-1  
18  
19 593 34 Rodríguez-Baño J, Gutiérrez-Gutiérrez B, Machuca I, *et al*. Treatment of Infections  
20  
21 594 Caused by Extended-Spectrum-Beta-Lactamase-, AmpC-, and Carbapenemase-  
22  
23 595 Producing *Enterobacteriaceae*. *Clin Microbiol Rev* 2018;**31**:e00079-17.  
24  
25 596 doi:10.1128/CMR.00079-17  
26  
27 597 35 Giannella M, Trecarichi EM, De Rosa FG, *et al*. Risk factors for carbapenem-resistant  
28  
29 598 *Klebsiella pneumoniae* bloodstream infection among rectal carriers: a prospective  
30  
31 599 observational multicentre study. *Clin Microbiol Infect* 2014;**20**:1357–62.  
32  
33 600 doi:10.1111/1469-0691.12747  
34  
35 601 36 Tischendorf J, de Avila RA, Safdar N. Risk of infection following colonization with  
36  
37 602 carbapenem-resistant *Enterobacteriaceae*: A systematic review. *Am J Infect Control*  
38  
39 603 2016;**44**:539–43. doi:10.1016/j.ajic.2015.12.005  
40  
41 604 37 Davido B, Batista R, Dinh A, *et al*. Fifty shades of graft: How to improve the efficacy of  
42  
43 605 faecal microbiota transplantation for decolonization of antibiotic-resistant bacteria. *Int*  
44  
45 606 *J Antimicrob Agents* 2019;**53**:553–6. doi:10.1016/j.ijantimicag.2019.03.008  
46  
47 607 38 Woodworth MH, Hayden MK, Young VB, *et al*. The Role of Fecal Microbiota  
48  
49 608 Transplantation in Reducing Intestinal Colonization With Antibiotic-Resistant  
50  
51 609 Organisms: The Current Landscape and Future Directions. *Open Forum Infect Dis*  
52  
53 610 2019;**6**. doi:10.1093/OFID/OFZ288  
54  
55  
56  
57  
58  
59  
60

- 1  
2  
3 611 39 Freitag TL, Hartikainen A, Jouhten H, *et al.* Minor Effect of Antibiotic Pre-treatment on  
4  
5 612 the Engraftment of Donor Microbiota in Fecal Transplantation in Mice. *Front Microbiol*  
6  
7 613 2019;**10**. doi:10.3389/FMICB.2019.02685  
8  
9 614 40 Ji SK, Yan H, Jiang T, *et al.* Preparing the Gut with Antibiotics Enhances Gut Microbiota  
10  
11 615 Reprogramming Efficiency by Promoting Xenomicrobiota Colonization. *Front Microbiol*  
12  
13 616 2017;**8**. doi:10.3389/FMICB.2017.01208  
14  
15  
16 617 41 Peng Z, Xiang J, He Z, *et al.* Colonic transendoscopic enteral tubing: A novel way of  
17  
18 618 transplanting fecal microbiota. *Endosc Int open* 2016;**4**:E610–3. doi:10.1055/S-0042-  
19  
20 619 105205  
21  
22  
23 620 42 Reigadas E, Bouza E, Olmedo M, *et al.* Faecal microbiota transplantation for recurrent  
24  
25 621 *Clostridioides difficile* infection: experience with lyophilized oral capsules. *J Hosp Infect*  
26  
27 622 2020;**105**:319–24. doi:10.1016/J.JHIN.2019.12.022  
28  
29  
30 623 43 Kao D, Roach B, Silva M, *et al.* Effect of Oral Capsule– vs Colonoscopy-Delivered Fecal  
31  
32 624 Microbiota Transplantation on Recurrent *Clostridium difficile* Infection: A Randomized  
33  
34 625 Clinical Trial. *JAMA* 2017;**318**:1985–93. doi:10.1001/JAMA.2017.17077  
35  
36  
37 626 44 Alagna L, Palomba E, Mangioni D, *et al.* Multidrug-Resistant Gram-Negative Bacteria  
38  
39 627 Decolonization in Immunocompromised Patients: A Focus on Fecal Microbiota  
40  
41 628 Transplantation. *Int J Mol Sci* 2020;**21**:1–22. doi:10.3390/IJMS21165619  
42  
43  
44 629

## 630 CONTRIBUTIONS

631 JCO, EPN, JTC, AC, MR, MJA, JCP, AD, EV, CN and LMM have made substantial  
632 contributions to the design of the work, critical revision for important intellectual content, and  
633 final approval of the version to be published. JCO, EPN, JTC, AC, MR, MJA, JCP, AD, EV, CN and  
634 LMM agree to be accountable for all aspects of the work in ensuring that questions related to  
635 the accuracy or integrity of any part of the work are appropriately investigated and resolved.  
636

Bmjopen-2021-058124\_Main manuscript\_clean copy

637 **TRIAL STATUS**

638 Current protocol approved is version 1.0 dated 4<sup>th</sup> September 2019. Recruitment will  
639 begin on 5<sup>th</sup> October 2021 and will end on 5<sup>th</sup> October 2023.

641 **FUNDING**

642. This work was supported by (1) research funds “FIS PI19-00281-KAPEDIS” granted to JJC from  
643 *Plan Estatal de I+D+i 2013-2016*, co-financed by the *ISCIII-Subdirección General de Evaluación y*  
644 *Fomento de la Investigación and the Fondo Europeo de Desarrollo Regional (FEDER)*; (2) *Plan*  
645 *Nacional de I+D+i 2013-2016 and Instituto de Salud Carlos III (ISCIII), Subdirección General de*  
646 *Redes y Centros de Investigación Cooperativa, Ministerio de Ciencia, Innovación y Universidades,*  
647 Spanish Network for Research in Infectious Diseases (RD16/0016/0008) - co-financed by  
648 European Development Regional Fund “*A way to achieve Europe*”, Operative program Intelligent  
649 Growth 2014-2020; and (3) The Network Center for Biomedical Research in Infectious Diseases  
650 (CIBERINFEC, CB21/13/00049), Instituto de Salud Carlos III (ISCIII), Madrid, Spain. EPN holds a  
651 research contract from *Consejería de Salud y Familias, Junta de Andalucía (RH-0065-2020I)*. The  
652 funders had no role in study design, data collection and interpretation, or the decision to submit  
653 the work for publication.

655 **COMPETING INTEREST STATEMENT**

656 Juan José Castón reports personal fees from Merck for educational purposes and a  
657 research grant from Pfizer outside the submitted work. All other authors declare that they have  
658 no competing interests.

660 **PATIENTS CONSENT FOR PUBLICATION**

661 Not required

662 **FIGURE LEGEND**

1  
2  
3 663 **Figure 1.** Schedule of enrolment, interventions, and assessments according to SPIRIT  
4 guidelines.  
5 664  
6 665  
7  
8  
9  
10  
11  
12  
13  
14  
15  
16  
17  
18  
19  
20  
21  
22  
23  
24  
25  
26  
27  
28  
29  
30  
31  
32  
33  
34  
35  
36  
37  
38  
39  
40  
41  
42  
43  
44  
45  
46  
47  
48  
49  
50  
51  
52  
53  
54  
55  
56  
57  
58  
59  
60

For peer review only



**Figure 1.** Schedule of enrolment, interventions, and assessments according to SPIRIT guidelines.

|                                      | STUDY PERIOD |            |                  |                     |                       |                       |          |
|--------------------------------------|--------------|------------|------------------|---------------------|-----------------------|-----------------------|----------|
|                                      | Enrolment    | Allocation | Post-allocation  |                     |                       |                       | Closeout |
|                                      | 0 d          | 0 d        | Visit 0<br>(0 d) | Visit 1<br>(7-10 d) | Visit 2<br>(30 ± 4 d) | Visit 3<br>(90 ± 5 d) | 90 d     |
| <b>ENROLMENT:</b>                    |              |            |                  |                     |                       |                       |          |
| Eligibility screen                   | X            |            |                  |                     |                       |                       |          |
| Informed consent                     | X            |            |                  |                     |                       |                       |          |
| Pregnancy test <sup>1</sup>          | X            |            |                  |                     |                       |                       |          |
| Randomization                        | X            |            |                  |                     |                       |                       |          |
| Medical history / Anamnesis          | X            |            |                  | X                   | X                     | X                     |          |
| Physical examination <sup>2</sup>    | X            |            |                  | X <sup>3</sup>      | X <sup>3</sup>        | X <sup>3</sup>        |          |
| Hemogram / Biochemistry <sup>3</sup> | X            |            |                  | X                   | X                     | X                     |          |
| Serology <sup>4</sup>                | X            |            |                  |                     |                       |                       |          |
| Rectal swab sample                   | X            |            | X                | X                   | X                     | X                     |          |
| Recording of concomitant medication  | X            |            |                  | X                   | X                     | X                     |          |
| Dispensing control                   | X            |            |                  |                     |                       |                       |          |
| Allocation                           |              | X          |                  |                     |                       |                       |          |
| <b>INTERVENTIONS:</b>                |              |            |                  |                     |                       |                       |          |
| FMT                                  |              |            | X                |                     |                       |                       |          |
| Placebo                              |              |            | X                |                     |                       |                       |          |
| <b>ASSESSMENTS:</b>                  |              |            |                  |                     |                       |                       |          |
| <b>Primary outcome</b>               |              |            |                  |                     |                       |                       |          |
| KPC-Kp eradication                   |              |            |                  |                     | X                     |                       | X        |
| <b>Secondary outcomes</b>            |              |            |                  |                     |                       |                       |          |
| Adverse events                       |              |            | X                | X                   | X                     | X                     | X        |
| Changes in RL <sub>KPC</sub>         |              |            | X                | X                   | X                     | X                     | X        |
| Decolonization test                  |              |            | X                | X                   | X                     | X                     | X        |
| Persistent KPC-Kp eradication        |              |            |                  |                     |                       | X                     | X        |
| Rate of KPC-Kp infections            |              |            |                  |                     |                       | X                     | X        |
| Crude mortality                      |              |            |                  |                     |                       | X                     | X        |

Abbreviations: d, days; FMT, Fecal Microbiota Transplantation; RL<sub>KPC</sub>, relative intestinal load of *bla*<sub>KPC</sub>.

<sup>1</sup> If female and of child-bearing age.

<sup>2</sup> Physical examination: weight, height, blood pressure, heart and respiratory rate and temperature. Does not apply if interview is conducted telephonically.

<sup>3</sup> Hemogram with at least hemoglobin, white blood cell count, neutrophils and platelets. Blood chemistry at least with creatinine, urea, bilirubin, transaminases and PCR.

<sup>4</sup> Serology for hepatitis A, B and C viruses; human immunodeficiency virus (HIV), HIV-1 and HIV-2; nontreponemal rapid plasma reagin (RPR) test, and fluorescent treponemal antibody absorbed (FTA-ABS) test.

**Annex 1. SPIRIT 2013 Checklist: Recommended items to address in a clinical trial protocol and related documents.**

| Section/item                                              | Item No | Description                                                                                                                                                                                                                                                                              | Page in the document |
|-----------------------------------------------------------|---------|------------------------------------------------------------------------------------------------------------------------------------------------------------------------------------------------------------------------------------------------------------------------------------------|----------------------|
| <b>Administrative information</b>                         |         |                                                                                                                                                                                                                                                                                          |                      |
| Title                                                     | 1       | Descriptive title identifying the study design, population, interventions, and, if applicable, trial acronym                                                                                                                                                                             | 1                    |
| Trial registration                                        | 2a      | Trial identifier and registry name. If not yet registered, name of intended registry                                                                                                                                                                                                     | 3                    |
|                                                           | 2b      | All items from the World Health Organization Trial Registration Data Set                                                                                                                                                                                                                 | --                   |
| Protocol version                                          | 3       | Date and version identifier                                                                                                                                                                                                                                                              | 274                  |
| Funding                                                   | 4       | Sources and types of financial, material, and other support                                                                                                                                                                                                                              | 274                  |
| Roles and responsibilities                                | 5a      | Names, affiliations, and roles of protocol contributors                                                                                                                                                                                                                                  | 1, 274               |
|                                                           | 5b      | Name and contact information for the trial sponsor                                                                                                                                                                                                                                       | --                   |
|                                                           | 5c      | Role of study sponsor and funders, if any, in study design; collection, management, analysis, and interpretation of data; writing of the report; and the decision to submit the report for publication, including whether they will have ultimate authority over any of these activities | 274                  |
|                                                           | 5d      | Composition, roles, and responsibilities of the coordinating centre, steering committee, endpoint adjudication committee, data management team, and other individuals or groups overseeing the trial, if applicable (see Item 21a for data monitoring committee)                         | --                   |
| <b>Introduction</b>                                       |         |                                                                                                                                                                                                                                                                                          |                      |
| Background and rationale                                  | 6a      | Description of research question and justification for undertaking the trial, including summary of relevant studies (published and unpublished) examining benefits and harms for each intervention                                                                                       | 5-7                  |
|                                                           | 6b      | Explanation for choice of comparators                                                                                                                                                                                                                                                    | 5-7                  |
| Objectives                                                | 7       | Specific objectives or hypotheses                                                                                                                                                                                                                                                        | 7,8                  |
| Trial design                                              | 8       | Description of trial design including type of trial (e.g., parallel group, crossover, factorial, single group), allocation ratio, and framework (e.g., superiority, equivalence, noninferiority, exploratory)                                                                            | 7                    |
| <b>Methods: Participants, interventions, and outcomes</b> |         |                                                                                                                                                                                                                                                                                          |                      |
| Study setting                                             | 9       | Description of study settings (e.g., community clinic, academic hospital) and list of countries where data will be collected. Reference to where list of study sites can be obtained                                                                                                     | 7                    |
| Eligibility criteria                                      | 10      | Inclusion and exclusion criteria for participants. If applicable, eligibility criteria for study centres and individuals who will perform the interventions (e.g., surgeons, psychotherapists)                                                                                           | 10-11                |
| Interventions                                             | 11a     | Interventions for each group with sufficient detail to allow replication, including how and when they will be administered                                                                                                                                                               | 42-43, 14-15         |
|                                                           | 11b     | Criteria for discontinuing or modifying allocated interventions for a given trial participant (e.g., drug dose change in response to harms, participant request, or improving/worsening disease)                                                                                         | 44-45, 16-17         |
|                                                           | 11c     | Strategies to improve adherence to intervention protocols, and any procedures for monitoring adherence (e.g., drug tablet return, laboratory tests)                                                                                                                                      | 42, Figure 1         |
|                                                           | 11d     | Relevant concomitant care and interventions that are permitted or prohibited during the trial                                                                                                                                                                                            | 40-43, 13-16         |

|    |                                                                     |     |                                                                                                                                                                                                                                                                                                                                                                                                                  |                            |
|----|---------------------------------------------------------------------|-----|------------------------------------------------------------------------------------------------------------------------------------------------------------------------------------------------------------------------------------------------------------------------------------------------------------------------------------------------------------------------------------------------------------------|----------------------------|
| 1  |                                                                     |     |                                                                                                                                                                                                                                                                                                                                                                                                                  |                            |
| 2  |                                                                     |     |                                                                                                                                                                                                                                                                                                                                                                                                                  |                            |
| 3  |                                                                     |     |                                                                                                                                                                                                                                                                                                                                                                                                                  |                            |
| 4  |                                                                     |     |                                                                                                                                                                                                                                                                                                                                                                                                                  |                            |
| 5  | Outcomes                                                            | 12  | Primary, secondary, and other outcomes, including the specific measurement variable (e.g., systolic blood pressure), analysis metric (e.g., change from baseline, final value, time to event), method of aggregation (e.g., median, proportion), and time point for each outcome. Explanation of the clinical relevance of chosen efficacy and harm outcomes is strongly recommended                             | 7,8, Figure 1              |
| 6  |                                                                     |     |                                                                                                                                                                                                                                                                                                                                                                                                                  |                            |
| 7  |                                                                     |     |                                                                                                                                                                                                                                                                                                                                                                                                                  |                            |
| 8  | Participant timeline                                                | 13  | Time schedule of enrolment, interventions (including any run-ins and washouts), assessments, and visits for participants. A schematic diagram is highly recommended (see Figure)                                                                                                                                                                                                                                 | Figure 1                   |
| 9  |                                                                     |     |                                                                                                                                                                                                                                                                                                                                                                                                                  |                            |
| 10 | Sample size                                                         | 14  | Estimated number of participants needed to achieve study objectives and how it was determined, including clinical and statistical assumptions supporting any sample size calculations                                                                                                                                                                                                                            | <a href="#">44-4516</a>    |
| 11 |                                                                     |     |                                                                                                                                                                                                                                                                                                                                                                                                                  |                            |
| 12 | Recruitment                                                         | 15  | Strategies for achieving adequate participant enrolment to reach target sample size                                                                                                                                                                                                                                                                                                                              | <a href="#">44-4516</a>    |
| 13 | <b>Methods: Assignment of interventions (for controlled trials)</b> |     |                                                                                                                                                                                                                                                                                                                                                                                                                  |                            |
| 14 | Allocation:                                                         |     |                                                                                                                                                                                                                                                                                                                                                                                                                  |                            |
| 15 | Sequence generation                                                 | 16a | Method of generating the allocation sequence (e.g., computer-generated random numbers), and list of any factors for stratification. To reduce predictability of a random sequence, details of any planned restriction (e.g., blocking) should be provided in a separate document that is unavailable to those who enrol participants or assign interventions                                                     | <a href="#">153</a>        |
| 16 |                                                                     |     |                                                                                                                                                                                                                                                                                                                                                                                                                  |                            |
| 17 | Allocation concealment mechanism                                    | 16b | Mechanism of implementing the allocation sequence (e.g., central telephone; sequentially numbered, opaque, sealed envelopes), describing any steps to conceal the sequence until interventions are assigned                                                                                                                                                                                                      | <a href="#">153</a>        |
| 18 | Implementation                                                      | 16c | Who will generate the allocation sequence, who will enrol participants, and who will assign participants to interventions                                                                                                                                                                                                                                                                                        | <a href="#">153</a>        |
| 19 |                                                                     |     |                                                                                                                                                                                                                                                                                                                                                                                                                  |                            |
| 20 | Blinding (masking)                                                  | 17a | Who will be blinded after assignment to interventions (e.g., trial participants, care providers, outcome assessors, data analysts), and how                                                                                                                                                                                                                                                                      | <a href="#">153</a>        |
| 21 |                                                                     | 17b | If blinded, circumstances under which unblinding is permissible, and procedure for revealing a participant's allocated intervention during the trial                                                                                                                                                                                                                                                             | <a href="#">153</a>        |
| 22 |                                                                     |     |                                                                                                                                                                                                                                                                                                                                                                                                                  |                            |
| 23 | <b>Methods: Data collection, management, and analysis</b>           |     |                                                                                                                                                                                                                                                                                                                                                                                                                  |                            |
| 24 | Data collection methods                                             | 18a | Plans for assessment and collection of outcome, baseline, and other trial data, including any related processes to promote data quality (e.g., duplicate measurements, training of assessors) and a description of study instruments (e.g., questionnaires, laboratory tests) along with their reliability and validity, if known. Reference to where data collection forms can be found, if not in the protocol | Figure 1                   |
| 25 |                                                                     | 18b | Plans to promote participant retention and complete follow-up, including list of any outcome data to be collected for participants who discontinue or deviate from intervention protocols                                                                                                                                                                                                                        | <a href="#">44-4516-17</a> |
| 26 |                                                                     |     |                                                                                                                                                                                                                                                                                                                                                                                                                  |                            |
| 27 | Data management                                                     | 19  | Plans for data entry, coding, security, and storage, including any related processes to promote data quality (e.g., double data entry; range checks for data values). Reference to where details of data management procedures can be found, if not in the protocol                                                                                                                                              | <a href="#">44-4516-17</a> |
| 28 |                                                                     |     |                                                                                                                                                                                                                                                                                                                                                                                                                  |                            |
| 29 | Statistical methods                                                 | 20a | Statistical methods for analysing primary and secondary outcomes. Reference to where other details of the statistical analysis plan can be found, if not in the protocol                                                                                                                                                                                                                                         | <a href="#">45-4617-18</a> |
| 30 |                                                                     | 20b | Methods for any additional analyses (e.g., subgroup and adjusted analyses)                                                                                                                                                                                                                                                                                                                                       | <a href="#">45-4617-18</a> |
| 31 |                                                                     | 20c | Definition of analysis population relating to protocol non-adherence (e.g., as randomised analysis), and any statistical methods to handle missing data (e.g., multiple imputation)                                                                                                                                                                                                                              | <a href="#">45-4617-18</a> |
| 32 |                                                                     |     |                                                                                                                                                                                                                                                                                                                                                                                                                  |                            |
| 33 | <b>Methods: Monitoring</b>                                          |     |                                                                                                                                                                                                                                                                                                                                                                                                                  |                            |
| 34 | Data monitoring                                                     | 21a | Composition of data monitoring committee (DMC); summary of its role and reporting structure; statement of whether it is independent from the sponsor and competing interests; and reference to where further details about its charter can be found, if not in the protocol. Alternatively, an explanation of why a DMC is not needed                                                                            | --                         |
| 35 |                                                                     | 21b | Description of any interim analyses and stopping guidelines, including who will have access to these interim results and make the final decision to terminate the trial                                                                                                                                                                                                                                          | --                         |
| 36 |                                                                     |     |                                                                                                                                                                                                                                                                                                                                                                                                                  |                            |
| 37 |                                                                     |     |                                                                                                                                                                                                                                                                                                                                                                                                                  |                            |
| 38 |                                                                     |     |                                                                                                                                                                                                                                                                                                                                                                                                                  |                            |
| 39 |                                                                     |     |                                                                                                                                                                                                                                                                                                                                                                                                                  |                            |
| 40 |                                                                     |     |                                                                                                                                                                                                                                                                                                                                                                                                                  |                            |
| 41 |                                                                     |     |                                                                                                                                                                                                                                                                                                                                                                                                                  |                            |
| 42 |                                                                     |     |                                                                                                                                                                                                                                                                                                                                                                                                                  |                            |
| 43 | 2                                                                   |     |                                                                                                                                                                                                                                                                                                                                                                                                                  |                            |
| 44 |                                                                     |     |                                                                                                                                                                                                                                                                                                                                                                                                                  |                            |
| 45 |                                                                     |     |                                                                                                                                                                                                                                                                                                                                                                                                                  |                            |
| 46 |                                                                     |     |                                                                                                                                                                                                                                                                                                                                                                                                                  |                            |

|    |                                 |     |                                                                                                                                                                                                                                                                                       |
|----|---------------------------------|-----|---------------------------------------------------------------------------------------------------------------------------------------------------------------------------------------------------------------------------------------------------------------------------------------|
| 1  |                                 |     |                                                                                                                                                                                                                                                                                       |
| 2  |                                 |     |                                                                                                                                                                                                                                                                                       |
| 3  |                                 |     |                                                                                                                                                                                                                                                                                       |
| 4  |                                 |     |                                                                                                                                                                                                                                                                                       |
| 5  | Harms                           | 22  | Plans for collecting, assessing, reporting, and managing solicited and spontaneously reported adverse events and other unintended effects of trial interventions or trial conduct                                                                                                     |
| 6  | Auditing                        | 23  | Frequency and procedures for auditing trial conduct, if any, and whether the process will be independent from investigators and the sponsor                                                                                                                                           |
| 7  | <hr/>                           |     |                                                                                                                                                                                                                                                                                       |
| 8  | <b>Ethics and dissemination</b> |     |                                                                                                                                                                                                                                                                                       |
| 9  | Research ethics approval        | 24  | Plans for seeking research ethics committee/institutional review board (REC/IRB) approval                                                                                                                                                                                             |
| 10 | Protocol amendments             | 25  | Plans for communicating important protocol modifications (e.g., changes to eligibility criteria, outcomes, analyses) to relevant parties (e.g., investigators, REC/IRBs, trial participants, trial registries, journals, regulators)                                                  |
| 11 | Consent or assent               | 26a | Who will obtain informed consent or assent from potential trial participants or authorised surrogates, and how (see Item 32)                                                                                                                                                          |
| 12 |                                 | 26b | Additional consent provisions for collection and use of participant data and biological specimens in ancillary studies, if applicable                                                                                                                                                 |
| 13 | Confidentiality                 | 27  | How personal information about potential and enrolled participants will be collected, shared, and maintained in order to protect confidentiality before, during, and after the trial                                                                                                  |
| 14 | Declaration of interests        | 28  | Financial and other competing interests for principal investigators for the overall trial and each study site                                                                                                                                                                         |
| 15 | Access to data                  | 29  | Statement of who will have access to the final trial dataset, and disclosure of contractual agreements that limit such access for investigators                                                                                                                                       |
| 16 | Ancillary and post-trial care   | 30  | Provisions, if any, for ancillary and post-trial care, and for compensation to those who suffer harm from trial participation                                                                                                                                                         |
| 17 | Dissemination policy            | 31a | Plans for investigators and sponsor to communicate trial results to participants, healthcare professionals, the public, and other relevant groups (e.g., via publication, reporting in results databases, or other data sharing arrangements), including any publication restrictions |
| 18 |                                 | 31b | Authorship eligibility guidelines and any intended use of professional writers                                                                                                                                                                                                        |
| 19 |                                 | 31c | Plans, if any, for granting public access to the full protocol, participant-level dataset, and statistical code                                                                                                                                                                       |
| 20 | <hr/>                           |     |                                                                                                                                                                                                                                                                                       |
| 21 | <b>Appendices</b>               |     |                                                                                                                                                                                                                                                                                       |
| 22 | Informed consent materials      | 32  | Model consent form and other related documentation given to participants and authorised surrogates                                                                                                                                                                                    |
| 23 | Biological specimens            | 33  | Plans for collection, laboratory evaluation, and storage of biological specimens for genetic or molecular analysis in the current trial and for future use in ancillary studies, if applicable                                                                                        |
| 24 | <hr/>                           |     |                                                                                                                                                                                                                                                                                       |
| 25 |                                 |     |                                                                                                                                                                                                                                                                                       |
| 26 |                                 |     |                                                                                                                                                                                                                                                                                       |
| 27 |                                 |     |                                                                                                                                                                                                                                                                                       |
| 28 |                                 |     |                                                                                                                                                                                                                                                                                       |
| 29 |                                 |     |                                                                                                                                                                                                                                                                                       |
| 30 |                                 |     |                                                                                                                                                                                                                                                                                       |
| 31 |                                 |     |                                                                                                                                                                                                                                                                                       |
| 32 |                                 |     |                                                                                                                                                                                                                                                                                       |
| 33 |                                 |     |                                                                                                                                                                                                                                                                                       |
| 34 |                                 |     |                                                                                                                                                                                                                                                                                       |
| 35 |                                 |     |                                                                                                                                                                                                                                                                                       |
| 36 |                                 |     |                                                                                                                                                                                                                                                                                       |
| 37 |                                 |     |                                                                                                                                                                                                                                                                                       |
| 38 |                                 |     |                                                                                                                                                                                                                                                                                       |
| 39 |                                 |     |                                                                                                                                                                                                                                                                                       |
| 40 |                                 |     |                                                                                                                                                                                                                                                                                       |
| 41 |                                 |     |                                                                                                                                                                                                                                                                                       |
| 42 |                                 |     |                                                                                                                                                                                                                                                                                       |
| 43 |                                 |     |                                                                                                                                                                                                                                                                                       |
| 44 |                                 |     |                                                                                                                                                                                                                                                                                       |
| 45 |                                 |     |                                                                                                                                                                                                                                                                                       |
| 46 |                                 |     |                                                                                                                                                                                                                                                                                       |

**Annex 1. SPIRIT 2013 Checklist: Recommended items to address in a clinical trial protocol and related documents.**

| Section/item                                              | Item No | Description                                                                                                                                                                                                                                                                              | Page in the document |
|-----------------------------------------------------------|---------|------------------------------------------------------------------------------------------------------------------------------------------------------------------------------------------------------------------------------------------------------------------------------------------|----------------------|
| <b>Administrative information</b>                         |         |                                                                                                                                                                                                                                                                                          |                      |
| Title                                                     | 1       | Descriptive title identifying the study design, population, interventions, and, if applicable, trial acronym                                                                                                                                                                             | 1                    |
| Trial registration                                        | 2a      | Trial identifier and registry name. If not yet registered, name of intended registry                                                                                                                                                                                                     | 3                    |
|                                                           | 2b      | All items from the World Health Organization Trial Registration Data Set                                                                                                                                                                                                                 | --                   |
| Protocol version                                          | 3       | Date and version identifier                                                                                                                                                                                                                                                              | 27                   |
| Funding                                                   | 4       | Sources and types of financial, material, and other support                                                                                                                                                                                                                              | 27                   |
| Roles and responsibilities                                | 5a      | Names, affiliations, and roles of protocol contributors                                                                                                                                                                                                                                  | 1, 27                |
|                                                           | 5b      | Name and contact information for the trial sponsor                                                                                                                                                                                                                                       | --                   |
|                                                           | 5c      | Role of study sponsor and funders, if any, in study design; collection, management, analysis, and interpretation of data; writing of the report; and the decision to submit the report for publication, including whether they will have ultimate authority over any of these activities | 27                   |
|                                                           | 5d      | Composition, roles, and responsibilities of the coordinating centre, steering committee, endpoint adjudication committee, data management team, and other individuals or groups overseeing the trial, if applicable (see Item 21a for data monitoring committee)                         | --                   |
| <b>Introduction</b>                                       |         |                                                                                                                                                                                                                                                                                          |                      |
| Background and rationale                                  | 6a      | Description of research question and justification for undertaking the trial, including summary of relevant studies (published and unpublished) examining benefits and harms for each intervention                                                                                       | 5-7                  |
|                                                           | 6b      | Explanation for choice of comparators                                                                                                                                                                                                                                                    | 5-7                  |
| Objectives                                                | 7       | Specific objectives or hypotheses                                                                                                                                                                                                                                                        | 7,8                  |
| Trial design                                              | 8       | Description of trial design including type of trial (e.g., parallel group, crossover, factorial, single group), allocation ratio, and framework (e.g., superiority, equivalence, noninferiority, exploratory)                                                                            | 7                    |
| <b>Methods: Participants, interventions, and outcomes</b> |         |                                                                                                                                                                                                                                                                                          |                      |
| Study setting                                             | 9       | Description of study settings (e.g., community clinic, academic hospital) and list of countries where data will be collected. Reference to where list of study sites can be obtained                                                                                                     | 7                    |
| Eligibility criteria                                      | 10      | Inclusion and exclusion criteria for participants. If applicable, eligibility criteria for study centres and individuals who will perform the interventions (e.g., surgeons, psychotherapists)                                                                                           | 10-11                |
| Interventions                                             | 11a     | Interventions for each group with sufficient detail to allow replication, including how and when they will be administered                                                                                                                                                               | 14-15                |
|                                                           | 11b     | Criteria for discontinuing or modifying allocated interventions for a given trial participant (e.g., drug dose change in response to harms, participant request, or improving/worsening disease)                                                                                         | 16-17                |
|                                                           | 11c     | Strategies to improve adherence to intervention protocols, and any procedures for monitoring adherence (e.g., drug tablet return, laboratory tests)                                                                                                                                      | Figure 1             |
|                                                           | 11d     | Relevant concomitant care and interventions that are permitted or prohibited during the trial                                                                                                                                                                                            | 13-16                |

|    |                                                                     |     |                                                                                                                                                                                                                                                                                                                                                                                                                  |               |
|----|---------------------------------------------------------------------|-----|------------------------------------------------------------------------------------------------------------------------------------------------------------------------------------------------------------------------------------------------------------------------------------------------------------------------------------------------------------------------------------------------------------------|---------------|
| 1  |                                                                     |     |                                                                                                                                                                                                                                                                                                                                                                                                                  |               |
| 2  |                                                                     |     |                                                                                                                                                                                                                                                                                                                                                                                                                  |               |
| 3  |                                                                     |     |                                                                                                                                                                                                                                                                                                                                                                                                                  |               |
| 4  |                                                                     |     |                                                                                                                                                                                                                                                                                                                                                                                                                  |               |
| 5  | Outcomes                                                            | 12  | Primary, secondary, and other outcomes, including the specific measurement variable (e.g., systolic blood pressure), analysis metric (e.g., change from baseline, final value, time to event), method of aggregation (e.g., median, proportion), and time point for each outcome. Explanation of the clinical relevance of chosen efficacy and harm outcomes is strongly recommended                             | 7,8, Figure 1 |
| 6  |                                                                     |     |                                                                                                                                                                                                                                                                                                                                                                                                                  |               |
| 7  |                                                                     |     |                                                                                                                                                                                                                                                                                                                                                                                                                  |               |
| 8  | Participant timeline                                                | 13  | Time schedule of enrolment, interventions (including any run-ins and washouts), assessments, and visits for participants. A schematic diagram is highly recommended (see Figure)                                                                                                                                                                                                                                 | Figure 1      |
| 9  |                                                                     |     |                                                                                                                                                                                                                                                                                                                                                                                                                  |               |
| 10 | Sample size                                                         | 14  | Estimated number of participants needed to achieve study objectives and how it was determined, including clinical and statistical assumptions supporting any sample size calculations                                                                                                                                                                                                                            | 16            |
| 11 |                                                                     |     |                                                                                                                                                                                                                                                                                                                                                                                                                  |               |
| 12 | Recruitment                                                         | 15  | Strategies for achieving adequate participant enrolment to reach target sample size                                                                                                                                                                                                                                                                                                                              | 16            |
| 13 | <b>Methods: Assignment of interventions (for controlled trials)</b> |     |                                                                                                                                                                                                                                                                                                                                                                                                                  |               |
| 14 | Allocation:                                                         |     |                                                                                                                                                                                                                                                                                                                                                                                                                  |               |
| 15 | Sequence generation                                                 | 16a | Method of generating the allocation sequence (e.g., computer-generated random numbers), and list of any factors for stratification. To reduce predictability of a random sequence, details of any planned restriction (e.g., blocking) should be provided in a separate document that is unavailable to those who enrol participants or assign interventions                                                     | 15            |
| 16 |                                                                     |     |                                                                                                                                                                                                                                                                                                                                                                                                                  |               |
| 17 | Allocation concealment mechanism                                    | 16b | Mechanism of implementing the allocation sequence (e.g., central telephone; sequentially numbered, opaque, sealed envelopes), describing any steps to conceal the sequence until interventions are assigned                                                                                                                                                                                                      | 15            |
| 18 | Implementation                                                      | 16c | Who will generate the allocation sequence, who will enrol participants, and who will assign participants to interventions                                                                                                                                                                                                                                                                                        | 15            |
| 19 |                                                                     |     |                                                                                                                                                                                                                                                                                                                                                                                                                  |               |
| 20 | Blinding (masking)                                                  | 17a | Who will be blinded after assignment to interventions (e.g., trial participants, care providers, outcome assessors, data analysts), and how                                                                                                                                                                                                                                                                      | 15            |
| 21 |                                                                     |     |                                                                                                                                                                                                                                                                                                                                                                                                                  |               |
| 22 |                                                                     | 17b | If blinded, circumstances under which unblinding is permissible, and procedure for revealing a participant's allocated intervention during the trial                                                                                                                                                                                                                                                             | 15            |
| 23 | <b>Methods: Data collection, management, and analysis</b>           |     |                                                                                                                                                                                                                                                                                                                                                                                                                  |               |
| 24 | Data collection methods                                             | 18a | Plans for assessment and collection of outcome, baseline, and other trial data, including any related processes to promote data quality (e.g., duplicate measurements, training of assessors) and a description of study instruments (e.g., questionnaires, laboratory tests) along with their reliability and validity, if known. Reference to where data collection forms can be found, if not in the protocol | Figure 1      |
| 25 |                                                                     |     |                                                                                                                                                                                                                                                                                                                                                                                                                  |               |
| 26 |                                                                     | 18b | Plans to promote participant retention and complete follow-up, including list of any outcome data to be collected for participants who discontinue or deviate from intervention protocols                                                                                                                                                                                                                        | 16-17         |
| 27 |                                                                     |     |                                                                                                                                                                                                                                                                                                                                                                                                                  |               |
| 28 | Data management                                                     | 19  | Plans for data entry, coding, security, and storage, including any related processes to promote data quality (e.g., double data entry; range checks for data values). Reference to where details of data management procedures can be found, if not in the protocol                                                                                                                                              | 16-17         |
| 29 |                                                                     |     |                                                                                                                                                                                                                                                                                                                                                                                                                  |               |
| 30 | Statistical methods                                                 | 20a | Statistical methods for analysing primary and secondary outcomes. Reference to where other details of the statistical analysis plan can be found, if not in the protocol                                                                                                                                                                                                                                         | 17-18         |
| 31 |                                                                     |     |                                                                                                                                                                                                                                                                                                                                                                                                                  |               |
| 32 |                                                                     | 20b | Methods for any additional analyses (e.g., subgroup and adjusted analyses)                                                                                                                                                                                                                                                                                                                                       | 17-18         |
| 33 |                                                                     | 20c | Definition of analysis population relating to protocol non-adherence (e.g., as randomised analysis), and any statistical methods to handle missing data (e.g., multiple imputation)                                                                                                                                                                                                                              | 17-18         |
| 34 | <b>Methods: Monitoring</b>                                          |     |                                                                                                                                                                                                                                                                                                                                                                                                                  |               |
| 35 | Data monitoring                                                     | 21a | Composition of data monitoring committee (DMC); summary of its role and reporting structure; statement of whether it is independent from the sponsor and competing interests; and reference to where further details about its charter can be found, if not in the protocol. Alternatively, an explanation of why a DMC is not needed                                                                            | --            |
| 36 |                                                                     |     |                                                                                                                                                                                                                                                                                                                                                                                                                  |               |
| 37 |                                                                     | 21b | Description of any interim analyses and stopping guidelines, including who will have access to these interim results and make the final decision to terminate the trial                                                                                                                                                                                                                                          | --            |
| 38 |                                                                     |     |                                                                                                                                                                                                                                                                                                                                                                                                                  |               |
| 39 |                                                                     |     |                                                                                                                                                                                                                                                                                                                                                                                                                  |               |
| 40 |                                                                     |     |                                                                                                                                                                                                                                                                                                                                                                                                                  |               |
| 41 |                                                                     |     |                                                                                                                                                                                                                                                                                                                                                                                                                  |               |
| 42 |                                                                     |     |                                                                                                                                                                                                                                                                                                                                                                                                                  |               |
| 43 | 2                                                                   |     |                                                                                                                                                                                                                                                                                                                                                                                                                  |               |
| 44 |                                                                     |     |                                                                                                                                                                                                                                                                                                                                                                                                                  |               |
| 45 |                                                                     |     |                                                                                                                                                                                                                                                                                                                                                                                                                  |               |
| 46 |                                                                     |     |                                                                                                                                                                                                                                                                                                                                                                                                                  |               |

1  
2  
3  
4  
5  
6  
7  
8  
9  
10  
11  
12  
13  
14  
15  
16  
17  
18  
19  
20  
21  
22  
23  
24  
25  
26  
27  
28  
29  
30  
31  
32  
33  
34  
35  
36  
37  
38  
39  
40  
41  
42  
43  
44  
45  
46

|                                 |     |                                                                                                                                                                                                                                                                                       |                |
|---------------------------------|-----|---------------------------------------------------------------------------------------------------------------------------------------------------------------------------------------------------------------------------------------------------------------------------------------|----------------|
| Harms                           | 22  | Plans for collecting, assessing, reporting, and managing solicited and spontaneously reported adverse events and other unintended effects of trial interventions or trial conduct                                                                                                     | 14             |
| Auditing                        | 23  | Frequency and procedures for auditing trial conduct, if any, and whether the process will be independent from investigators and the sponsor                                                                                                                                           | 14             |
| <b>Ethics and dissemination</b> |     |                                                                                                                                                                                                                                                                                       |                |
| Research ethics approval        | 24  | Plans for seeking research ethics committee/institutional review board (REC/IRB) approval                                                                                                                                                                                             | 16             |
| Protocol amendments             | 25  | Plans for communicating important protocol modifications (e.g., changes to eligibility criteria, outcomes, analyses) to relevant parties (e.g., investigators, REC/IRBs, trial participants, trial registries, journals, regulators)                                                  | 16             |
| Consent or assent               | 26a | Who will obtain informed consent or assent from potential trial participants or authorised surrogates, and how (see Item 32)                                                                                                                                                          | 16             |
|                                 | 26b | Additional consent provisions for collection and use of participant data and biological specimens in ancillary studies, if applicable                                                                                                                                                 | Non-applicable |
| Confidentiality                 | 27  | How personal information about potential and enrolled participants will be collected, shared, and maintained in order to protect confidentiality before, during, and after the trial                                                                                                  | 16             |
| Declaration of interests        | 28  | Financial and other competing interests for principal investigators for the overall trial and each study site                                                                                                                                                                         | 24             |
| Access to data                  | 29  | Statement of who will have access to the final trial dataset, and disclosure of contractual agreements that limit such access for investigators                                                                                                                                       | 16             |
| Ancillary and post-trial care   | 30  | Provisions, if any, for ancillary and post-trial care, and for compensation to those who suffer harm from trial participation                                                                                                                                                         | 14             |
| Dissemination policy            | 31a | Plans for investigators and sponsor to communicate trial results to participants, healthcare professionals, the public, and other relevant groups (e.g., via publication, reporting in results databases, or other data sharing arrangements), including any publication restrictions | 16             |
|                                 | 31b | Authorship eligibility guidelines and any intended use of professional writers                                                                                                                                                                                                        | --             |
|                                 | 31c | Plans, if any, for granting public access to the full protocol, participant-level dataset, and statistical code                                                                                                                                                                       | --             |
| <b>Appendices</b>               |     |                                                                                                                                                                                                                                                                                       |                |
| Informed consent materials      | 32  | Model consent form and other related documentation given to participants and authorised surrogates                                                                                                                                                                                    | Annex 2        |
| Biological specimens            | 33  | Plans for collection, laboratory evaluation, and storage of biological specimens for genetic or molecular analysis in the current trial and for future use in ancillary studies, if applicable                                                                                        | Non-applicable |

Bmjopen-2021-058124\_Supplemental Material

Supplemental Materials (Copyright of Mikrobiomik)

Supplementary Table S1. Donor Questionnaire ..... 2  
Supplementary Table S2. Interview with the donor ..... 4  
Supplementary Table S3. Microbiological screening for donors ..... 8

For peer review only

1  
2  
3  
4  
5  
6  
7  
8  
9  
10  
11  
12  
13  
14  
15  
16  
17  
18  
19  
20  
21  
22  
23  
24  
25  
26  
27  
28  
29  
30  
31  
32  
33  
34  
35  
36  
37  
38  
39  
40  
41  
42  
43  
44  
45  
46  
47  
48  
49  
50  
51  
52  
53  
54  
55  
56  
57  
58  
59  
60



Supplementary Table S1. Donor Questionnaire

| Inclusion criteria |                        | Response |
|--------------------|------------------------|----------|
| 1.                 | Aged 18 to 50          |          |
| 2.                 | Gender                 |          |
| 3.                 | Height                 |          |
| 4.                 | Weight                 |          |
| 5.                 | Body Mass Index (< 30) |          |

| Exclusion criteria      |                                                                                                                                                    | Response                                                  |
|-------------------------|----------------------------------------------------------------------------------------------------------------------------------------------------|-----------------------------------------------------------|
| <b>Gastrointestinal</b> |                                                                                                                                                    |                                                           |
| 7.                      | Have you or a direct relative (parents, siblings or children) suffered from colon cancer or polyposis?                                             | <input type="checkbox"/> YES <input type="checkbox"/> NOT |
| 8.                      | Have you or a direct relative (parents, siblings or children) suffered from intestinal inflammatory disease (Crohn disease or ulcerative colitis)? | <input type="checkbox"/> YES <input type="checkbox"/> NOT |
| 9.                      | Do you regularly have a fever or intestinal disorders, such as diarrhoea, abdominal pain or blood in the stools?                                   | <input type="checkbox"/> YES <input type="checkbox"/> NOT |
| 10.                     | Do you suffer from celiac disease or other chronic digestive disorders?                                                                            | <input type="checkbox"/> YES <input type="checkbox"/> NOT |
| 11.                     | Are you diabetic?                                                                                                                                  | <input type="checkbox"/> YES <input type="checkbox"/> NOT |
| <b>Neurologic</b>       |                                                                                                                                                    |                                                           |
| 12.                     | Have you taken medications in the last 12 months, or have you been in treatment or in consultation for attention deficit or hyperactivity?         | <input type="checkbox"/> YES <input type="checkbox"/> NOT |
| 13.                     | Have you taken medication in the last 12 months, or have you been in treatment or in consultation for depression?                                  | <input type="checkbox"/> YES <input type="checkbox"/> NOT |
| 14.                     | In the last 12 months, have you regularly experienced symptoms of depression?                                                                      | <input type="checkbox"/> YES <input type="checkbox"/> NOT |
| 15.                     | Have you taken medications in the last 12 months, or have you been in treatment or in consultation for anxiety?                                    | <input type="checkbox"/> YES <input type="checkbox"/> NOT |
| 16.                     | In the last 12 months, have you regularly experienced symptoms of anxiety?                                                                         | <input type="checkbox"/> YES <input type="checkbox"/> NOT |

## Bmjopen-2021-058124\_Supplemental Material

|     |                                                                                                                                             |                                                           |
|-----|---------------------------------------------------------------------------------------------------------------------------------------------|-----------------------------------------------------------|
| 17. | Do you have any seasonal, food, animal, medication, latex, dust or other allergies?                                                         | <input type="checkbox"/> YES <input type="checkbox"/> NOT |
| 18. | Have you had symptoms of eczema or psoriasis in the last eight weeks?                                                                       | <input type="checkbox"/> YES <input type="checkbox"/> NOT |
| 19. | Have you taken antibiotics, antifungals, antivirals, or any other drug that can alter the microbiota in the last three months?              | <input type="checkbox"/> YES <input type="checkbox"/> NOT |
| 20. | Have you taken medications related to gastric reflux?                                                                                       | <input type="checkbox"/> YES <input type="checkbox"/> NOT |
| 21. | Have you had an asthma attack in the last 12 months?                                                                                        | <input type="checkbox"/> YES <input type="checkbox"/> NOT |
| 22. | Have you had unprotected sex with a new partner in the last three months?                                                                   | <input type="checkbox"/> YES <input type="checkbox"/> NOT |
| 23. | Have you had a fever, frequent cough, or felt short of breath in the last two weeks?                                                        | <input type="checkbox"/> YES <input type="checkbox"/> NOT |
| 24. | Have you gotten a new tattoo in the last six months?                                                                                        | <input type="checkbox"/> YES <input type="checkbox"/> NOT |
| 25. | Have you had a piercing in the last six months?                                                                                             | <input type="checkbox"/> YES <input type="checkbox"/> NOT |
| 26. | Have you been vaccinated with live attenuated virus vaccines in the last six months?                                                        | <input type="checkbox"/> YES <input type="checkbox"/> NOT |
| 27. | Have you received an injection or vaccine in the last 8 weeks?                                                                              | <input type="checkbox"/> YES <input type="checkbox"/> NOT |
| 28. | Does your work or activity as a volunteer involve any contact with any animal or plant tissue, chronic patients, nursing homes or hospital? | <input type="checkbox"/> YES <input type="checkbox"/> NOT |
| 29. | Do you have or have you ever had any type of cancer?                                                                                        | <input type="checkbox"/> YES <input type="checkbox"/> NOT |
| 30. | If you are a woman, is there a chance you are pregnant?                                                                                     | <input type="checkbox"/> YES <input type="checkbox"/> NOT |
| 31. | If you are a woman, Have you had a delivery or a termination of pregnancy in the last 6 months?                                             | <input type="checkbox"/> YES <input type="checkbox"/> NOT |
| 32. | What countries have you visited in the last 12 months?:                                                                                     |                                                           |
| 33. | What is your highest degree of education?                                                                                                   |                                                           |
| 34. | Are you interested in receiving additional information?                                                                                     | <input type="checkbox"/> YES <input type="checkbox"/> NOT |
| 35. | Reason for donating: to fight <i>C. difficile</i> , earn money, supporting research, helping patients, other.                               |                                                           |

\* Patients with affirmative responses to questions number 6, 19, 20, 23, 24, 25, 26, 27, 30, 31 and 32 (depending on the country) are classified as temporarily unrecruitable.

\* Patients with affirmative responses to questions number 7, 8, 9, 10, 11, 12, 13, 14, 15, 16, 17, 18, 21, 22, 28 y 29 are classified as definitively unrecruitable.

Supplementary Table S2. Interview with the donor

| GENERAL CRITERIA                                                                                                 | Response                                                  |
|------------------------------------------------------------------------------------------------------------------|-----------------------------------------------------------|
| 1. Do you suffer, or have you ever suffered from any major illness (including in childhood)?                     | <input type="checkbox"/> YES <input type="checkbox"/> NOT |
| 2. Are you being studied for any health problems?                                                                | <input type="checkbox"/> YES <input type="checkbox"/> NOT |
| 3. Have you ever been admitted to a hospital?                                                                    | <input type="checkbox"/> YES <input type="checkbox"/> NOT |
| 4. Have you ever had surgery?                                                                                    | <input type="checkbox"/> YES <input type="checkbox"/> NOT |
| 5. Did you receive breastfeeding in childhood?                                                                   | <input type="checkbox"/> YES <input type="checkbox"/> NOT |
| 6. Have you received the vaccines correctly according to the vaccination schedule?                               | <input type="checkbox"/> YES <input type="checkbox"/> NOT |
| 7. Do you take any treatment regularly? If yes, please specify:                                                  | <input type="checkbox"/> YES <input type="checkbox"/> NOT |
| 8. Are you allergic to any medication or food?                                                                   | <input type="checkbox"/> YES <input type="checkbox"/> NOT |
| 9. Do you drink alcohol regularly?                                                                               | <input type="checkbox"/> YES <input type="checkbox"/> NOT |
| 10. Do you smoke? How many cigarettes a day?                                                                     | <input type="checkbox"/> YES <input type="checkbox"/> NOT |
| 11. Have you had surgery in the last three months?                                                               | <input type="checkbox"/> YES <input type="checkbox"/> NOT |
| 12. Have you had a gastroscopy or colonoscopy in the last three months?                                          | <input type="checkbox"/> YES <input type="checkbox"/> NOT |
| 13. Have you had a tattoo or piercing in the last six months?                                                    | <input type="checkbox"/> YES <input type="checkbox"/> NOT |
| 14. Have you been treated with acupuncture or suffered an accidental needle stick in the last six months?        | <input type="checkbox"/> YES <input type="checkbox"/> NOT |
| 15. In the last 12 months, have you had contact with another person's blood?                                     | <input type="checkbox"/> YES <input type="checkbox"/> NOT |
| 16. Have you changed your sexual partner in the last three months?                                               | <input type="checkbox"/> YES <input type="checkbox"/> NOT |
| 17. Have you had more than one sexual partner in the last three months?                                          | <input type="checkbox"/> YES <input type="checkbox"/> NOT |
| 18. Have you had any sexually transmitted infections in the last three months?                                   | <input type="checkbox"/> YES <input type="checkbox"/> NOT |
| 19. Have you used any illicit drug intravenously, inhaled, snorted or by another route in the last three months? | <input type="checkbox"/> YES <input type="checkbox"/> NOT |
| 20. If you are a woman, is there any chance you are pregnant?                                                    | <input type="checkbox"/> YES <input type="checkbox"/> NOT |
| 21. If you are a woman, have you had a delivery or a termination of pregnancy in the last six months?            | <input type="checkbox"/> YES <input type="checkbox"/> NOT |
| Digestive criteria                                                                                               | Response                                                  |

## Bmjopen-2021-058124\_Supplemental Material

|                                     |                                                                                                                                                                                                    |                                                           |
|-------------------------------------|----------------------------------------------------------------------------------------------------------------------------------------------------------------------------------------------------|-----------------------------------------------------------|
| 22.                                 | What is the frequency of your bowel movements?                                                                                                                                                     |                                                           |
| 23.                                 | What is the usual time you pass stools?                                                                                                                                                            |                                                           |
| 24.                                 | What is the usual consistency of your stools?                                                                                                                                                      |                                                           |
| 25.                                 | Do you suffer from any digestive disease?                                                                                                                                                          | <input type="checkbox"/> YES <input type="checkbox"/> NOT |
| 26.                                 | Are you diabetic?                                                                                                                                                                                  | <input type="checkbox"/> YES <input type="checkbox"/> NOT |
| 27.                                 | Do you suffer from irritable bowel syndrome, chronic functional constipation or chronic functional diarrhoea?                                                                                      | <input type="checkbox"/> YES <input type="checkbox"/> NOT |
| 28.                                 | Do you have celiac disease or any other chronic digestive disorders?                                                                                                                               | <input type="checkbox"/> YES <input type="checkbox"/> NOT |
| 29.                                 | Have you recently had diarrhoea, bloody stools, abdominal pain, or any other significant digestive symptoms in the last three months?                                                              | <input type="checkbox"/> YES <input type="checkbox"/> NOT |
| 30.                                 | Do you have a history or high risk of gastrointestinal cancer or polyposis?                                                                                                                        | <input type="checkbox"/> YES <input type="checkbox"/> NOT |
| 31.                                 | Has anyone in your family had colon cancer? (parents, siblings or children)                                                                                                                        | <input type="checkbox"/> YES <input type="checkbox"/> NOT |
| 32.                                 | Is there anyone diagnosed with Chron's disease or ulcerative colitis in your family? (parents, siblings or children)                                                                               | <input type="checkbox"/> YES <input type="checkbox"/> NOT |
| 33.                                 | Have you undergone major surgery on the digestive system? (excluding appendectomy) (parents, siblings or children)                                                                                 | <input type="checkbox"/> YES <input type="checkbox"/> NOT |
| <b>Infectious Diseases Criteria</b> |                                                                                                                                                                                                    | <b>Response</b>                                           |
| 34.                                 | Have you or someone close to you suffered from a COVID-19 infection?                                                                                                                               | <input type="checkbox"/> YES <input type="checkbox"/> NOT |
| 35.                                 | Have you suffered from malaria, Chagas disease or babesiosis?                                                                                                                                      | <input type="checkbox"/> YES <input type="checkbox"/> NOT |
| 36.                                 | Have you ever had a positive test for HIV?                                                                                                                                                         | <input type="checkbox"/> YES <input type="checkbox"/> NOT |
| 37.                                 | Have you ever had HTLV (human T-cell lymphotropic virus type 1 and 2) or tuberculosis?                                                                                                             | <input type="checkbox"/> YES <input type="checkbox"/> NOT |
| 38.                                 | Have you had risky sexual relations (i.e. sexual contact with strangers, prostitutes, drug addicts, patients with HIV, patients with viral hepatitis, syphilis or have you worked as a prostitute? | <input type="checkbox"/> YES <input type="checkbox"/> NOT |
| 39.                                 | In the last 12 months, have you had sexual contact with someone who used needles for drugs, steroids or anything else that a doctor did not prescribe?                                             | <input type="checkbox"/> YES <input type="checkbox"/> NOT |
| 40.                                 | In the last 12 months, have you had or been treated for any sexually transmitted disease? (syphilis, gonorrhoea)                                                                                   | <input type="checkbox"/> YES <input type="checkbox"/> NOT |
| 41.                                 | Have you had sexual contact with someone with HIV, hepatitis B or hepatitis C?                                                                                                                     | <input type="checkbox"/> YES <input type="checkbox"/> NOT |
| 42.                                 | Have you been in contact with another person's blood or been pricked with any Sharp material that could be contaminated with another person's blood or fluids in the last six months?              | <input type="checkbox"/> YES <input type="checkbox"/> NOT |

|               |                                                                                                                                                |                                                           |
|---------------|------------------------------------------------------------------------------------------------------------------------------------------------|-----------------------------------------------------------|
| 43.           | In the last 12 months, have you had sexual contact with someone suffering from haemophilia or receiving clotting factor concentrates?          | <input type="checkbox"/> YES <input type="checkbox"/> NOT |
| 44.           | If you are a female donor, in the last 12 months, have you had sexual contact with a man who has ever had sexual contact with another man?     | <input type="checkbox"/> YES <input type="checkbox"/> NOT |
| 45.           | If you are a male donor, have you ever had sexual contact with another man?                                                                    | <input type="checkbox"/> YES <input type="checkbox"/> NOT |
| 46.           | Have you had any recent infections by gastrointestinal microorganisms?                                                                         | <input type="checkbox"/> YES <input type="checkbox"/> NOT |
| 47.           | Have you been outside of Spain in the last three years? Discuss your trips and activities with your doctor.                                    | <input type="checkbox"/> YES <input type="checkbox"/> NOT |
| 48.           | Have you ever spent more than a month in any country in Latin America, Asia or Africa?                                                         | <input type="checkbox"/> YES <input type="checkbox"/> NOT |
| 49.           | Have you travelled in the last six months to tropical countries with endemic diarrheal diseases or those with a risk of traveller's diarrhoea? | <input type="checkbox"/> YES <input type="checkbox"/> NOT |
| 50.           | Between 1980 and 1996, were you in the UK for more than three months?                                                                          | <input type="checkbox"/> YES <input type="checkbox"/> NOT |
| 51.           | From 1980 to the present, have you received a blood transfusion in the UK or France?                                                           | <input type="checkbox"/> YES <input type="checkbox"/> NOT |
| 53.           | Have you had contact with someone vaccinated for smallpox in the last eight weeks?                                                             | <input type="checkbox"/> YES <input type="checkbox"/> NOT |
| 54.           | Have you been vaccinated with live attenuated virus vaccines in the last six months?                                                           | <input type="checkbox"/> YES <input type="checkbox"/> NOT |
| 55.           | Have you had an injection or vaccine in the last eight weeks?                                                                                  | <input type="checkbox"/> YES <input type="checkbox"/> NOT |
| <b>Others</b> |                                                                                                                                                | <b>Response</b>                                           |
| 56.           | Do you have cancer, or have you had it in the last ten years?                                                                                  | <input type="checkbox"/> YES <input type="checkbox"/> NOT |
| 57.           | Do you suffer from any blood disease or any tendency to bleed?                                                                                 | <input type="checkbox"/> YES <input type="checkbox"/> NOT |
| 58.           | Have you received any transfusion of blood or derived products in the last 12 months?                                                          | <input type="checkbox"/> YES <input type="checkbox"/> NOT |
| 59.           | Have you received a tissue (bone or skin), organ, or bone marrow graft in the last 12 months?                                                  | <input type="checkbox"/> YES <input type="checkbox"/> NOT |
| 60.           | Have you ever had a dura mater graft or brain sheath graft?                                                                                    | <input type="checkbox"/> YES <input type="checkbox"/> NOT |
| 61.           | In the last 16 weeks, have you donated red blood cells through an apheresis machine?                                                           | <input type="checkbox"/> YES <input type="checkbox"/> NOT |
| 62.           | Do any of your relatives have Creutzfeld-Jakob disease?                                                                                        | <input type="checkbox"/> YES <input type="checkbox"/> NOT |
| 63.           | In the last 12 months, have you been in a correctional or correctional facility or arrested for more than 72 hours?                            | <input type="checkbox"/> YES <input type="checkbox"/> NOT |
| 64.           | Are you a health worker or a worker in a hospital or health institution?                                                                       | <input type="checkbox"/> YES <input type="checkbox"/> NOT |
| 65.           | Do you work with animals?                                                                                                                      | <input type="checkbox"/> YES <input type="checkbox"/> NOT |

## Bmjopen-2021-058124\_Supplemental Material

|                                                                                                                                 |                                                           |
|---------------------------------------------------------------------------------------------------------------------------------|-----------------------------------------------------------|
| 66. Do you have the legal capacity to sign informed consent?                                                                    | <input type="checkbox"/> YES <input type="checkbox"/> NOT |
| 67. Have you ever had any heart or liver problems?                                                                              | <input type="checkbox"/> YES <input type="checkbox"/> NOT |
| 68. Do you have chronic hepatitis?                                                                                              | <input type="checkbox"/> YES <input type="checkbox"/> NOT |
| 69. Do you suffer from chronic renal insufficiency?                                                                             | <input type="checkbox"/> YES <input type="checkbox"/> NOT |
| 70. Do you suffer from autoimmune diseases affecting the digestive tube?                                                        | <input type="checkbox"/> YES <input type="checkbox"/> NOT |
| 71. Do you suffer from metabolic syndrome?                                                                                      | <input type="checkbox"/> YES <input type="checkbox"/> NOT |
| 72. Do you suffer from any neurological, neurodegenerative or psychiatric disease?                                              | <input type="checkbox"/> YES <input type="checkbox"/> NOT |
| 73. Do you suffer from vascular disease?                                                                                        | <input type="checkbox"/> YES <input type="checkbox"/> NOT |
| <b>Drugs</b>                                                                                                                    | <b>Response</b>                                           |
| 74. Have you taken antibiotics, antifungals, antivirals, or any other drug that alters the microbiota in the last three months? | <input type="checkbox"/> YES <input type="checkbox"/> NOT |
| 75. Have you taken proton pump inhibitors in the last three months?                                                             | <input type="checkbox"/> YES <input type="checkbox"/> NOT |
| 76. Have you received immunosuppressive medication or chemotherapy in the last three months?                                    | <input type="checkbox"/> YES <input type="checkbox"/> NOT |
| 77. Have you received systemic antineoplastic agents in the last three months?                                                  | <input type="checkbox"/> YES <input type="checkbox"/> NOT |

1  
2  
3  
4  
5  
6  
7  
8  
9  
10  
11  
12  
13  
14  
15  
16  
17  
18  
19  
20  
21  
22  
23  
24  
25  
26  
27  
28  
29  
30  
31  
32  
33  
34  
35  
36  
37  
38  
39  
40  
41  
42  
43  
44  
45  
46

Supplementary Table S3. Microbiological screening for donors

|                                                                                                                                                                                                                                                                                                  |                                                                                                                                                                                                                                                                                                                                                                                                                                                                                                                                                                                                                                                                                                                                                                                                                                                                                                      |                                                                                                                                                                                                                                                                                                  |                                                                                                                                                                                                                                                                                                                                                                       |
|--------------------------------------------------------------------------------------------------------------------------------------------------------------------------------------------------------------------------------------------------------------------------------------------------|------------------------------------------------------------------------------------------------------------------------------------------------------------------------------------------------------------------------------------------------------------------------------------------------------------------------------------------------------------------------------------------------------------------------------------------------------------------------------------------------------------------------------------------------------------------------------------------------------------------------------------------------------------------------------------------------------------------------------------------------------------------------------------------------------------------------------------------------------------------------------------------------------|--------------------------------------------------------------------------------------------------------------------------------------------------------------------------------------------------------------------------------------------------------------------------------------------------|-----------------------------------------------------------------------------------------------------------------------------------------------------------------------------------------------------------------------------------------------------------------------------------------------------------------------------------------------------------------------|
| <b>1. DONOR BLOOD SCREENING</b>                                                                                                                                                                                                                                                                  |                                                                                                                                                                                                                                                                                                                                                                                                                                                                                                                                                                                                                                                                                                                                                                                                                                                                                                      |                                                                                                                                                                                                                                                                                                  |                                                                                                                                                                                                                                                                                                                                                                       |
| <b>1.1. GENERAL LABORATORY</b>                                                                                                                                                                                                                                                                   |                                                                                                                                                                                                                                                                                                                                                                                                                                                                                                                                                                                                                                                                                                                                                                                                                                                                                                      |                                                                                                                                                                                                                                                                                                  |                                                                                                                                                                                                                                                                                                                                                                       |
| 1.1.1.                                                                                                                                                                                                                                                                                           | Hemogram <input type="checkbox"/>                                                                                                                                                                                                                                                                                                                                                                                                                                                                                                                                                                                                                                                                                                                                                                                                                                                                    |                                                                                                                                                                                                                                                                                                  |                                                                                                                                                                                                                                                                                                                                                                       |
| 1.1.2.                                                                                                                                                                                                                                                                                           | Biochemistry: <table border="0" style="width: 100%;"> <tr> <td style="width: 50%; vertical-align: top;"> <input type="checkbox"/> Creatinine<br/> <input type="checkbox"/> Urea<br/> <input type="checkbox"/> Glucose<br/> <input type="checkbox"/> Sodium<br/> <input type="checkbox"/> Potassium<br/> <input type="checkbox"/> Chloride<br/> <input type="checkbox"/> Calcium<br/> <input type="checkbox"/> Magnesium         </td> <td style="width: 50%; vertical-align: top;"> <input type="checkbox"/> Phosphorus<br/> <input type="checkbox"/> Uric acid<br/> <input type="checkbox"/> Alanine aminotransferase<br/> <input type="checkbox"/> Aspartate aminotransferase<br/> <input type="checkbox"/> Alkaline phosphatase<br/> <input type="checkbox"/> Total bilirubin<br/> <input type="checkbox"/> Albumin<br/> <input type="checkbox"/> C-reactive protein         </td> </tr> </table> | <input type="checkbox"/> Creatinine<br><input type="checkbox"/> Urea<br><input type="checkbox"/> Glucose<br><input type="checkbox"/> Sodium<br><input type="checkbox"/> Potassium<br><input type="checkbox"/> Chloride<br><input type="checkbox"/> Calcium<br><input type="checkbox"/> Magnesium | <input type="checkbox"/> Phosphorus<br><input type="checkbox"/> Uric acid<br><input type="checkbox"/> Alanine aminotransferase<br><input type="checkbox"/> Aspartate aminotransferase<br><input type="checkbox"/> Alkaline phosphatase<br><input type="checkbox"/> Total bilirubin<br><input type="checkbox"/> Albumin<br><input type="checkbox"/> C-reactive protein |
| <input type="checkbox"/> Creatinine<br><input type="checkbox"/> Urea<br><input type="checkbox"/> Glucose<br><input type="checkbox"/> Sodium<br><input type="checkbox"/> Potassium<br><input type="checkbox"/> Chloride<br><input type="checkbox"/> Calcium<br><input type="checkbox"/> Magnesium | <input type="checkbox"/> Phosphorus<br><input type="checkbox"/> Uric acid<br><input type="checkbox"/> Alanine aminotransferase<br><input type="checkbox"/> Aspartate aminotransferase<br><input type="checkbox"/> Alkaline phosphatase<br><input type="checkbox"/> Total bilirubin<br><input type="checkbox"/> Albumin<br><input type="checkbox"/> C-reactive protein                                                                                                                                                                                                                                                                                                                                                                                                                                                                                                                                |                                                                                                                                                                                                                                                                                                  |                                                                                                                                                                                                                                                                                                                                                                       |
| 1.1.1.                                                                                                                                                                                                                                                                                           | Lipids: <ul style="list-style-type: none"> <li><input type="checkbox"/> Triglycerides</li> <li><input type="checkbox"/> Total cholesterol</li> <li><input type="checkbox"/> High-density lipoprotein</li> <li><input type="checkbox"/> Low-density lipoprotein</li> </ul>                                                                                                                                                                                                                                                                                                                                                                                                                                                                                                                                                                                                                            |                                                                                                                                                                                                                                                                                                  |                                                                                                                                                                                                                                                                                                                                                                       |
| <b>1.2. MICROBIOLOGICAL STUDIES</b>                                                                                                                                                                                                                                                              |                                                                                                                                                                                                                                                                                                                                                                                                                                                                                                                                                                                                                                                                                                                                                                                                                                                                                                      |                                                                                                                                                                                                                                                                                                  |                                                                                                                                                                                                                                                                                                                                                                       |
| Hepatitis A virus: <input type="checkbox"/> Immunoglobulin M (IgM)<br><input type="checkbox"/> Immunoglobulin G (IgG)                                                                                                                                                                            |                                                                                                                                                                                                                                                                                                                                                                                                                                                                                                                                                                                                                                                                                                                                                                                                                                                                                                      |                                                                                                                                                                                                                                                                                                  |                                                                                                                                                                                                                                                                                                                                                                       |
| Hepatitis B virus: <input type="checkbox"/> Serum hepatitis B surface antigen<br><input type="checkbox"/> Antibodies to hepatitis B core antigen (IgG)<br><input type="checkbox"/> Antibodies to hepatitis B core antigen (IgM)<br><input type="checkbox"/> Hepatitis B surface antibody         |                                                                                                                                                                                                                                                                                                                                                                                                                                                                                                                                                                                                                                                                                                                                                                                                                                                                                                      |                                                                                                                                                                                                                                                                                                  |                                                                                                                                                                                                                                                                                                                                                                       |
| Hepatitis C virus: <input type="checkbox"/> Hepatitis C immunoglobulin                                                                                                                                                                                                                           |                                                                                                                                                                                                                                                                                                                                                                                                                                                                                                                                                                                                                                                                                                                                                                                                                                                                                                      |                                                                                                                                                                                                                                                                                                  |                                                                                                                                                                                                                                                                                                                                                                       |
| Hepatitis E virus: <input type="checkbox"/> Ig M                                                                                                                                                                                                                                                 |                                                                                                                                                                                                                                                                                                                                                                                                                                                                                                                                                                                                                                                                                                                                                                                                                                                                                                      |                                                                                                                                                                                                                                                                                                  |                                                                                                                                                                                                                                                                                                                                                                       |

## Bmjopen-2021-058124\_Supplemental Material

|                                                                                                                                                                                                              |
|--------------------------------------------------------------------------------------------------------------------------------------------------------------------------------------------------------------|
| <input type="checkbox"/> Ig G                                                                                                                                                                                |
| Human immunodeficiency virus: <input type="checkbox"/> HIV-1/HIV-2 antibodies/p24 test                                                                                                                       |
| SARS-COV-2: <input type="checkbox"/> Ig M                                                                                                                                                                    |
| <input type="checkbox"/> Ig G                                                                                                                                                                                |
| Syphilis: <input type="checkbox"/> Rapid plasma reagin<br>(If reactive, a FTA-ABS test will be performed)                                                                                                    |
| Cytomegalovirus: <input type="checkbox"/> IgM                                                                                                                                                                |
| <input type="checkbox"/> IgG                                                                                                                                                                                 |
| Epstein-Barr virus: <input type="checkbox"/> IgM                                                                                                                                                             |
| <input type="checkbox"/> IgG                                                                                                                                                                                 |
| <b>2. SCREENING OF DONOR FECES</b>                                                                                                                                                                           |
| <input type="checkbox"/> <i>Clostridioides difficile</i> : Glutamate dehydrogenase (GDH9 testing assay and/or toxin A and B.<br>(if GDH is positive, a test for toxins A and B or culture will be performed) |
| <input type="checkbox"/> <i>Giardia Lamblia</i> antigen test                                                                                                                                                 |
| <input type="checkbox"/> Helicobacter Pylori antigen test                                                                                                                                                    |
| <input type="checkbox"/> Strongyloides                                                                                                                                                                       |
| <input type="checkbox"/> <i>Giardia lamblia</i>                                                                                                                                                              |
| <input type="checkbox"/> <i>Salmonella</i> spp.                                                                                                                                                              |
| <input type="checkbox"/> <i>Shigella</i> spp.                                                                                                                                                                |
| <input type="checkbox"/> <i>Campylobacter</i> spp.                                                                                                                                                           |
| <input type="checkbox"/> Enteropathogenic <i>Escherichia coli</i>                                                                                                                                            |
| <input type="checkbox"/> <i>Yersinia</i> spp.                                                                                                                                                                |
| <input type="checkbox"/> <i>Vibrio cholerae</i>                                                                                                                                                              |
| <input type="checkbox"/> <i>Listeria monocytogenes</i>                                                                                                                                                       |
| <input type="checkbox"/> Blastocystis                                                                                                                                                                        |
| <input type="checkbox"/> <i>Entamoeba histolytica</i>                                                                                                                                                        |



1  
2  
3  
4  
5  
6  
7  
8  
9  
10  
11  
12  
13  
14  
15  
16  
17  
18  
19  
20  
21  
22  
23  
24  
25  
26  
27  
28  
29  
30  
31  
32  
33  
34  
35  
36  
37  
38  
39  
40  
41  
42  
43  
44  
45  
46

|                                                                                                                                                                                                                                                                                                                                                                                                                         |
|-------------------------------------------------------------------------------------------------------------------------------------------------------------------------------------------------------------------------------------------------------------------------------------------------------------------------------------------------------------------------------------------------------------------------|
| <input type="checkbox"/> <i>Cryptosporidium</i>                                                                                                                                                                                                                                                                                                                                                                         |
| <input type="checkbox"/> Norovirus                                                                                                                                                                                                                                                                                                                                                                                      |
| <input type="checkbox"/> Adenovirus                                                                                                                                                                                                                                                                                                                                                                                     |
| <input type="checkbox"/> Rotavirus                                                                                                                                                                                                                                                                                                                                                                                      |
| <input type="checkbox"/> Ova and parasite test                                                                                                                                                                                                                                                                                                                                                                          |
| Multidrug-resistant bacteria: <ul style="list-style-type: none"><li><input type="checkbox"/> Extended-spectrum beta-lactamase-producing <i>Enterobacterales</i></li><li><input type="checkbox"/> Carbapenemase-producing <i>Enterobacterales</i></li><li><input type="checkbox"/> Vancomycin-resistant <i>Enterococci</i></li><li><input type="checkbox"/> Methicillin-resistant <i>Staphylococcus aureus</i></li></ul> |
| <input type="checkbox"/> Fecal occult blood test                                                                                                                                                                                                                                                                                                                                                                        |
| <input type="checkbox"/> Fecal calprotectin                                                                                                                                                                                                                                                                                                                                                                             |
| <b>3. NASOPHARINGEAL SCREENING FOR SARS-CoV2/COVID-19</b>                                                                                                                                                                                                                                                                                                                                                               |
