# Supplementary material for: Randomised, double-blind, placebo-controlled, phase 2, superiority trial to demonstrate the effectiveness of faecal microbiota transplantation for selective intestinal decolonisation of patients colonised by carbapenemase-producing Klebsiella pneumoniae (KAPEDIS)
Source: PubMed Central journal article supplement — BMJ Open. 2022 Apr 6;12(4):e058124. doi: 10.1136/bmjopen-2021-058124 (PMC8987760; doi:10.1136/bmjopen-2021-058124), 2022-04-06
Supplement: bmjopen-2021-058124supp002.pdf [file bmjopen-2021-058124supp002.pdf]

## Bmjopen-2021-058124\_Supplemental Material

## Supplemental Materials (Copyright of Mikrobiomik)

|                                                                    |   |
|--------------------------------------------------------------------|---|
| Supplementary Table S1. Donor Questionnaire .....                  | 2 |
| Supplementary Table S2. Interview with the donor .....             | 4 |
| Supplementary Table S3. Microbiological screening for donors ..... | 8 |

Supplementary Table S1. Donor Questionnaire

| Inclusion criteria |                        | Response |
|--------------------|------------------------|----------|
| 1.                 | Aged 18 to 50          |          |
| 2.                 | Gender                 |          |
| 3.                 | Height                 |          |
| 4.                 | Weight                 |          |
| 5.                 | Body Mass Index (< 30) |          |

| Exclusion criteria      |                                                                                                                                                    | Response                                                  |
|-------------------------|----------------------------------------------------------------------------------------------------------------------------------------------------|-----------------------------------------------------------|
| <b>Gastrointestinal</b> |                                                                                                                                                    |                                                           |
| 7.                      | Have you or a direct relative (parents, siblings or children) suffered from colon cancer or polyposis?                                             | <input type="checkbox"/> YES <input type="checkbox"/> NOT |
| 8.                      | Have you or a direct relative (parents, siblings or children) suffered from intestinal inflammatory disease (Crohn disease or ulcerative colitis)? | <input type="checkbox"/> YES <input type="checkbox"/> NOT |
| 9.                      | Do you regularly have a fever or intestinal disorders, such as diarrhoea, abdominal pain or blood in the stools?                                   | <input type="checkbox"/> YES <input type="checkbox"/> NOT |
| 10.                     | Do you suffer from celiac disease or other chronic digestive disorders?                                                                            | <input type="checkbox"/> YES <input type="checkbox"/> NOT |
| 11.                     | Are you diabetic?                                                                                                                                  | <input type="checkbox"/> YES <input type="checkbox"/> NOT |
| <b>Neurologic</b>       |                                                                                                                                                    |                                                           |
| 12.                     | Have you taken medications in the last 12 months, or have you been in treatment or in consultation for attention deficit or hyperactivity?         | <input type="checkbox"/> YES <input type="checkbox"/> NOT |
| 13.                     | Have you taken medication in the last 12 months, or have you been in treatment or in consultation for depression?                                  | <input type="checkbox"/> YES <input type="checkbox"/> NOT |
| 14.                     | In the last 12 months, have you regularly experienced symptoms of depression?                                                                      | <input type="checkbox"/> YES <input type="checkbox"/> NOT |
| 15.                     | Have you taken medications in the last 12 months, or have you been in treatment or in consultation for anxiety?                                    | <input type="checkbox"/> YES <input type="checkbox"/> NOT |
| 16.                     | In the last 12 months, have you regularly experienced symptoms of anxiety?                                                                         | <input type="checkbox"/> YES <input type="checkbox"/> NOT |

## Bmjopen-2021-058124\_Supplemental Material

|                                                                                                                                                 |                                                           |
|-------------------------------------------------------------------------------------------------------------------------------------------------|-----------------------------------------------------------|
| 17. Do you have any seasonal, food, animal, medication, latex, dust or other allergies?                                                         | <input type="checkbox"/> YES <input type="checkbox"/> NOT |
| 18. Have you had symptoms of eczema or psoriasis in the last eight weeks?                                                                       | <input type="checkbox"/> YES <input type="checkbox"/> NOT |
| 19. Have you taken antibiotics, antifungals, antivirals, or any other drug that can alter the microbiota in the last three months?              | <input type="checkbox"/> YES <input type="checkbox"/> NOT |
| 20. Have you taken medications related to gastric reflux?                                                                                       | <input type="checkbox"/> YES <input type="checkbox"/> NOT |
| 21. Have you had an asthma attack in the last 12 months?                                                                                        | <input type="checkbox"/> YES <input type="checkbox"/> NOT |
| 22. Have you had unprotected sex with a new partner in the last three months?                                                                   | <input type="checkbox"/> YES <input type="checkbox"/> NOT |
| 23. Have you had a fever, frequent cough, or felt short of breath in the last two weeks?                                                        | <input type="checkbox"/> YES <input type="checkbox"/> NOT |
| 24. Have you gotten a new tattoo in the last six months?                                                                                        | <input type="checkbox"/> YES <input type="checkbox"/> NOT |
| 25. Have you had a piercing in the last six months?                                                                                             | <input type="checkbox"/> YES <input type="checkbox"/> NOT |
| 26. Have you been vaccinated with live attenuated virus vaccines in the last six months?                                                        | <input type="checkbox"/> YES <input type="checkbox"/> NOT |
| 27. Have you received an injection or vaccine in the last 8 weeks?                                                                              | <input type="checkbox"/> YES <input type="checkbox"/> NOT |
| 28. Does your work or activity as a volunteer involve any contact with any animal or plant tissue, chronic patients, nursing homes or hospital? | <input type="checkbox"/> YES <input type="checkbox"/> NOT |
| 29. Do you have or have you ever had any type of cancer?                                                                                        | <input type="checkbox"/> YES <input type="checkbox"/> NOT |
| 30. If you are a woman, is there a chance you are pregnant?                                                                                     | <input type="checkbox"/> YES <input type="checkbox"/> NOT |
| 31. If you are a woman, Have you had a delivery or a termination of pregnancy in the last 6 months?                                             | <input type="checkbox"/> YES <input type="checkbox"/> NOT |
| 32. What countries have you visited in the last 12 months?:                                                                                     |                                                           |
| 33. What is your highest degree of education?                                                                                                   |                                                           |
| 34. Are you interested in receiving additional information?                                                                                     | <input type="checkbox"/> YES <input type="checkbox"/> NOT |
| 35. Reason for donating: to fight <i>C. difficile</i> , earn money, supporting research, helping patients, other.                               |                                                           |

\* Patients with affirmative responses to questions number 6, 19, 20, 23, 24, 25, 26, 27, 30, 31 and 32 (depending on the country) are classified as temporarily unrecruitable.

\* Patients with affirmative responses to questions number 7, 8, 9, 10, 11, 12, 13, 14, 15, 16, 17, 18, 21, 22, 28 y 29 are classified as definitively unrecruitable.

Supplementary Table S2. Interview with the donor

| GENERAL CRITERIA                                                                                                 | Response                                                  |
|------------------------------------------------------------------------------------------------------------------|-----------------------------------------------------------|
| 1. Do you suffer, or have you ever suffered from any major illness (including in childhood)?                     | <input type="checkbox"/> YES <input type="checkbox"/> NOT |
| 2. Are you being studied for any health problems?                                                                | <input type="checkbox"/> YES <input type="checkbox"/> NOT |
| 3. Have you ever been admitted to a hospital?                                                                    | <input type="checkbox"/> YES <input type="checkbox"/> NOT |
| 4. Have you ever had surgery?                                                                                    | <input type="checkbox"/> YES <input type="checkbox"/> NOT |
| 5. Did you receive breastfeeding in childhood?                                                                   | <input type="checkbox"/> YES <input type="checkbox"/> NOT |
| 6. Have you received the vaccines correctly according to the vaccination schedule?                               | <input type="checkbox"/> YES <input type="checkbox"/> NOT |
| 7. Do you take any treatment regularly? If yes, please specify:                                                  | <input type="checkbox"/> YES <input type="checkbox"/> NOT |
| 8. Are you allergic to any medication or food?                                                                   | <input type="checkbox"/> YES <input type="checkbox"/> NOT |
| 9. Do you drink alcohol regularly?                                                                               | <input type="checkbox"/> YES <input type="checkbox"/> NOT |
| 10. Do you smoke? How many cigarettes a day?                                                                     | <input type="checkbox"/> YES <input type="checkbox"/> NOT |
| 11. Have you had surgery in the last three months?                                                               | <input type="checkbox"/> YES <input type="checkbox"/> NOT |
| 12. Have you had a gastroscopy or colonoscopy in the last three months?                                          | <input type="checkbox"/> YES <input type="checkbox"/> NOT |
| 13. Have you had a tattoo or piercing in the last six months?                                                    | <input type="checkbox"/> YES <input type="checkbox"/> NOT |
| 14. Have you been treated with acupuncture or suffered an accidental needle stick in the last six months?        | <input type="checkbox"/> YES <input type="checkbox"/> NOT |
| 15. In the last 12 months, have you had contact with another person's blood?                                     | <input type="checkbox"/> YES <input type="checkbox"/> NOT |
| 16. Have you changed your sexual partner in the last three months?                                               | <input type="checkbox"/> YES <input type="checkbox"/> NOT |
| 17. Have you had more than one sexual partner in the last three months?                                          | <input type="checkbox"/> YES <input type="checkbox"/> NOT |
| 18. Have you had any sexually transmitted infections in the last three months?                                   | <input type="checkbox"/> YES <input type="checkbox"/> NOT |
| 19. Have you used any illicit drug intravenously, inhaled, snorted or by another route in the last three months? | <input type="checkbox"/> YES <input type="checkbox"/> NOT |
| 20. If you are a woman, is there any chance you are pregnant?                                                    | <input type="checkbox"/> YES <input type="checkbox"/> NOT |
| 21. If you are a woman, have you had a delivery or a termination of pregnancy in the last six months?            | <input type="checkbox"/> YES <input type="checkbox"/> NOT |
| Digestive criteria                                                                                               | Response                                                  |

## Bmjopen-2021-058124\_Supplemental Material

|                                                                                                                                                                                                        |                                                           |
|--------------------------------------------------------------------------------------------------------------------------------------------------------------------------------------------------------|-----------------------------------------------------------|
| 22. What is the frequency of your bowel movements?                                                                                                                                                     |                                                           |
| 23. What is the usual time you pass stools?                                                                                                                                                            |                                                           |
| 24. What is the usual consistency of your stools?                                                                                                                                                      |                                                           |
| 25. Do you suffer from any digestive disease?                                                                                                                                                          | <input type="checkbox"/> YES <input type="checkbox"/> NOT |
| 26. Are you diabetic?                                                                                                                                                                                  | <input type="checkbox"/> YES <input type="checkbox"/> NOT |
| 27. Do you suffer from irritable bowel syndrome, chronic functional constipation or chronic functional diarrhoea?                                                                                      | <input type="checkbox"/> YES <input type="checkbox"/> NOT |
| 28. Do you have celiac disease or any other chronic digestive disorders?                                                                                                                               | <input type="checkbox"/> YES <input type="checkbox"/> NOT |
| 29. Have you recently had diarrhoea, bloody stools, abdominal pain, or any other significant digestive symptoms in the last three months?                                                              | <input type="checkbox"/> YES <input type="checkbox"/> NOT |
| 30. Do you have a history or high risk of gastrointestinal cancer or polyposis?                                                                                                                        | <input type="checkbox"/> YES <input type="checkbox"/> NOT |
| 31. Has anyone in your family had colon cancer? (parents, siblings or children)                                                                                                                        | <input type="checkbox"/> YES <input type="checkbox"/> NOT |
| 32. Is there anyone diagnosed with Chron's disease or ulcerative colitis in your family? (parents, siblings or children)                                                                               | <input type="checkbox"/> YES <input type="checkbox"/> NOT |
| 33. Have you undergone major surgery on the digestive system? (excluding appendectomy) (parents, siblings or children)                                                                                 | <input type="checkbox"/> YES <input type="checkbox"/> NOT |
| <b>Infectious Diseases Criteria</b>                                                                                                                                                                    | <b>Response</b>                                           |
| 34. Have you or someone close to you suffered from a COVID-19 infection?                                                                                                                               | <input type="checkbox"/> YES <input type="checkbox"/> NOT |
| 35. Have you suffered from malaria, Chagas disease or babesiosis?                                                                                                                                      | <input type="checkbox"/> YES <input type="checkbox"/> NOT |
| 36. Have you ever had a positive test for HIV?                                                                                                                                                         | <input type="checkbox"/> YES <input type="checkbox"/> NOT |
| 37. Have you ever had HTLV (human T-cell lymphotropic virus type 1 and 2) or tuberculosis?                                                                                                             | <input type="checkbox"/> YES <input type="checkbox"/> NOT |
| 38. Have you had risky sexual relations (i.e. sexual contact with strangers, prostitutes, drug addicts, patients with HIV, patients with viral hepatitis, syphilis or have you worked as a prostitute? | <input type="checkbox"/> YES <input type="checkbox"/> NOT |
| 39. In the last 12 months, have you had sexual contact with someone who used needles for drugs, steroids or anything else that a doctor did not prescribe?                                             | <input type="checkbox"/> YES <input type="checkbox"/> NOT |
| 40. In the last 12 months, have you had or been treated for any sexually transmitted disease? (syphilis, gonorrhoea)                                                                                   | <input type="checkbox"/> YES <input type="checkbox"/> NOT |
| 41. Have you had sexual contact with someone with HIV, hepatitis B or hepatitis C?                                                                                                                     | <input type="checkbox"/> YES <input type="checkbox"/> NOT |
| 42. Have you been in contact with another person's blood or been pricked with any Sharp material that could be contaminated with another person's blood or fluids in the last six months?              | <input type="checkbox"/> YES <input type="checkbox"/> NOT |

|                                                                                                                                                    |                                                           |
|----------------------------------------------------------------------------------------------------------------------------------------------------|-----------------------------------------------------------|
| 43. In the last 12 months, have you had sexual contact with someone suffering from haemophilia or receiving clotting factor concentrates?          | <input type="checkbox"/> YES <input type="checkbox"/> NOT |
| 44. If you are a female donor, in the last 12 months, have you had sexual contact with a man who has ever had sexual contact with another man?     | <input type="checkbox"/> YES <input type="checkbox"/> NOT |
| 45. If you are a male donor, have you ever had sexual contact with another man?                                                                    | <input type="checkbox"/> YES <input type="checkbox"/> NOT |
| 46. Have you had any recent infections by gastrointestinal microorganisms?                                                                         | <input type="checkbox"/> YES <input type="checkbox"/> NOT |
| 47. Have you been outside of Spain in the last three years? Discuss your trips and activities with your doctor.                                    | <input type="checkbox"/> YES <input type="checkbox"/> NOT |
| 48. Have you ever spent more than a month in any country in Latin America, Asia or Africa?                                                         | <input type="checkbox"/> YES <input type="checkbox"/> NOT |
| 49. Have you travelled in the last six months to tropical countries with endemic diarrheal diseases or those with a risk of traveller's diarrhoea? | <input type="checkbox"/> YES <input type="checkbox"/> NOT |
| 50. Between 1980 and 1996, were you in the UK for more than three months?                                                                          | <input type="checkbox"/> YES <input type="checkbox"/> NOT |
| 51. From 1980 to the present, have you received a blood transfusion in the UK or France?                                                           | <input type="checkbox"/> YES <input type="checkbox"/> NOT |
| 53. Have you had contact with someone vaccinated for smallpox in the last eight weeks?                                                             | <input type="checkbox"/> YES <input type="checkbox"/> NOT |
| 54. Have you been vaccinated with live attenuated virus vaccines in the last six months?                                                           | <input type="checkbox"/> YES <input type="checkbox"/> NOT |
| 55. Have you had an injection or vaccine in the last eight weeks?                                                                                  | <input type="checkbox"/> YES <input type="checkbox"/> NOT |
| <b>Others</b>                                                                                                                                      | <b>Response</b>                                           |
| 56. Do you have cancer, or have you had it in the last ten years?                                                                                  | <input type="checkbox"/> YES <input type="checkbox"/> NOT |
| 57. Do you suffer from any blood disease or any tendency to bleed?                                                                                 | <input type="checkbox"/> YES <input type="checkbox"/> NOT |
| 58. Have you received any transfusion of blood or derived products in the last 12 months?                                                          | <input type="checkbox"/> YES <input type="checkbox"/> NOT |
| 59. Have you received a tissue (bone or skin), organ, or bone marrow graft in the last 12 months?                                                  | <input type="checkbox"/> YES <input type="checkbox"/> NOT |
| 60. Have you ever had a dura mater graft or brain sheath graft?                                                                                    | <input type="checkbox"/> YES <input type="checkbox"/> NOT |
| 61. In the last 16 weeks, have you donated red blood cells through an apheresis machine?                                                           | <input type="checkbox"/> YES <input type="checkbox"/> NOT |
| 62. Do any of your relatives have Creutzfeld-Jakob disease?                                                                                        | <input type="checkbox"/> YES <input type="checkbox"/> NOT |
| 63. In the last 12 months, have you been in a correctional or correctional facility or arrested for more than 72 hours?                            | <input type="checkbox"/> YES <input type="checkbox"/> NOT |
| 64. Are you a health worker or a worker in a hospital or health institution?                                                                       | <input type="checkbox"/> YES <input type="checkbox"/> NOT |
| 65. Do you work with animals?                                                                                                                      | <input type="checkbox"/> YES <input type="checkbox"/> NOT |

## Bmjopen-2021-058124\_Supplemental Material

|                                                                                                                                 |                              |                              |
|---------------------------------------------------------------------------------------------------------------------------------|------------------------------|------------------------------|
| 66. Do you have the legal capacity to sign informed consent?                                                                    | <input type="checkbox"/> YES | <input type="checkbox"/> NOT |
| 67. Have you ever had any heart or liver problems?                                                                              | <input type="checkbox"/> YES | <input type="checkbox"/> NOT |
| 68. Do you have chronic hepatitis?                                                                                              | <input type="checkbox"/> YES | <input type="checkbox"/> NOT |
| 69. Do you suffer from chronic renal insufficiency?                                                                             | <input type="checkbox"/> YES | <input type="checkbox"/> NOT |
| 70. Do you suffer from autoimmune diseases affecting the digestive tube?                                                        | <input type="checkbox"/> YES | <input type="checkbox"/> NOT |
| 71. Do you suffer from metabolic syndrome?                                                                                      | <input type="checkbox"/> YES | <input type="checkbox"/> NOT |
| 72. Do you suffer from any neurological, neurodegenerative or psychiatric disease?                                              | <input type="checkbox"/> YES | <input type="checkbox"/> NOT |
| 73. Do you suffer from vascular disease?                                                                                        | <input type="checkbox"/> YES | <input type="checkbox"/> NOT |
| <b>Drugs</b>                                                                                                                    | <b>Response</b>              |                              |
| 74. Have you taken antibiotics, antifungals, antivirals, or any other drug that alters the microbiota in the last three months? | <input type="checkbox"/> YES | <input type="checkbox"/> NOT |
| 75. Have you taken proton pump inhibitors in the last three months?                                                             | <input type="checkbox"/> YES | <input type="checkbox"/> NOT |
| 76. Have you received immunosuppressive medication or chemotherapy in the last three months?                                    | <input type="checkbox"/> YES | <input type="checkbox"/> NOT |
| 77. Have you received systemic antineoplastic agents in the last three months?                                                  | <input type="checkbox"/> YES | <input type="checkbox"/> NOT |

Supplementary Table S3. Microbiological screening for donors

| <b>1. DONOR BLOOD SCREENING</b>                                                                                                                                                                                                                                                                  |                                                                                                                                                                                                                                                                                                                                                                                                                                                                                                                                                                                                                                                                                                                                                                                                                                                                                                                  |                                                                                                                                                                                                                                                                                                  |                                                                                                                                                                                                                                                                                                                                                                       |
|--------------------------------------------------------------------------------------------------------------------------------------------------------------------------------------------------------------------------------------------------------------------------------------------------|------------------------------------------------------------------------------------------------------------------------------------------------------------------------------------------------------------------------------------------------------------------------------------------------------------------------------------------------------------------------------------------------------------------------------------------------------------------------------------------------------------------------------------------------------------------------------------------------------------------------------------------------------------------------------------------------------------------------------------------------------------------------------------------------------------------------------------------------------------------------------------------------------------------|--------------------------------------------------------------------------------------------------------------------------------------------------------------------------------------------------------------------------------------------------------------------------------------------------|-----------------------------------------------------------------------------------------------------------------------------------------------------------------------------------------------------------------------------------------------------------------------------------------------------------------------------------------------------------------------|
| <b>1.1. GENERAL LABORATORY</b>                                                                                                                                                                                                                                                                   |                                                                                                                                                                                                                                                                                                                                                                                                                                                                                                                                                                                                                                                                                                                                                                                                                                                                                                                  |                                                                                                                                                                                                                                                                                                  |                                                                                                                                                                                                                                                                                                                                                                       |
| 1.1.1.                                                                                                                                                                                                                                                                                           | Hemogram <input type="checkbox"/>                                                                                                                                                                                                                                                                                                                                                                                                                                                                                                                                                                                                                                                                                                                                                                                                                                                                                |                                                                                                                                                                                                                                                                                                  |                                                                                                                                                                                                                                                                                                                                                                       |
| 1.1.2.                                                                                                                                                                                                                                                                                           | Biochemistry: <table border="0" style="width: 100%;"> <tr> <td style="width: 50%; vertical-align: top;"> <input type="checkbox"/> Creatinine<br/> <input type="checkbox"/> Urea<br/> <input type="checkbox"/> Glucose<br/> <input type="checkbox"/> Sodium<br/> <input type="checkbox"/> Potassium<br/> <input type="checkbox"/> Chloride<br/> <input type="checkbox"/> Calcium<br/> <input type="checkbox"/> Magnesium               </td> <td style="width: 50%; vertical-align: top;"> <input type="checkbox"/> Phosphorus<br/> <input type="checkbox"/> Uric acid<br/> <input type="checkbox"/> Alanine aminotransferase<br/> <input type="checkbox"/> Aspartate aminotransferase<br/> <input type="checkbox"/> Alkaline phosphatase<br/> <input type="checkbox"/> Total bilirubin<br/> <input type="checkbox"/> Albumin<br/> <input type="checkbox"/> C-reactive protein               </td> </tr> </table> | <input type="checkbox"/> Creatinine<br><input type="checkbox"/> Urea<br><input type="checkbox"/> Glucose<br><input type="checkbox"/> Sodium<br><input type="checkbox"/> Potassium<br><input type="checkbox"/> Chloride<br><input type="checkbox"/> Calcium<br><input type="checkbox"/> Magnesium | <input type="checkbox"/> Phosphorus<br><input type="checkbox"/> Uric acid<br><input type="checkbox"/> Alanine aminotransferase<br><input type="checkbox"/> Aspartate aminotransferase<br><input type="checkbox"/> Alkaline phosphatase<br><input type="checkbox"/> Total bilirubin<br><input type="checkbox"/> Albumin<br><input type="checkbox"/> C-reactive protein |
| <input type="checkbox"/> Creatinine<br><input type="checkbox"/> Urea<br><input type="checkbox"/> Glucose<br><input type="checkbox"/> Sodium<br><input type="checkbox"/> Potassium<br><input type="checkbox"/> Chloride<br><input type="checkbox"/> Calcium<br><input type="checkbox"/> Magnesium | <input type="checkbox"/> Phosphorus<br><input type="checkbox"/> Uric acid<br><input type="checkbox"/> Alanine aminotransferase<br><input type="checkbox"/> Aspartate aminotransferase<br><input type="checkbox"/> Alkaline phosphatase<br><input type="checkbox"/> Total bilirubin<br><input type="checkbox"/> Albumin<br><input type="checkbox"/> C-reactive protein                                                                                                                                                                                                                                                                                                                                                                                                                                                                                                                                            |                                                                                                                                                                                                                                                                                                  |                                                                                                                                                                                                                                                                                                                                                                       |
| 1.1.1.                                                                                                                                                                                                                                                                                           | Lipids: <ul style="list-style-type: none"> <li><input type="checkbox"/> Triglycerides</li> <li><input type="checkbox"/> Total cholesterol</li> <li><input type="checkbox"/> High-density lipoprotein</li> <li><input type="checkbox"/> Low-density lipoprotein</li> </ul>                                                                                                                                                                                                                                                                                                                                                                                                                                                                                                                                                                                                                                        |                                                                                                                                                                                                                                                                                                  |                                                                                                                                                                                                                                                                                                                                                                       |
| <b>1.2. MICROBIOLOGICAL STUDIES</b>                                                                                                                                                                                                                                                              |                                                                                                                                                                                                                                                                                                                                                                                                                                                                                                                                                                                                                                                                                                                                                                                                                                                                                                                  |                                                                                                                                                                                                                                                                                                  |                                                                                                                                                                                                                                                                                                                                                                       |
| Hepatitis A virus: <input type="checkbox"/> Immunoglobulin M (IgM)<br><input type="checkbox"/> Immunoglobulin G (IgG)                                                                                                                                                                            |                                                                                                                                                                                                                                                                                                                                                                                                                                                                                                                                                                                                                                                                                                                                                                                                                                                                                                                  |                                                                                                                                                                                                                                                                                                  |                                                                                                                                                                                                                                                                                                                                                                       |
| Hepatitis B virus: <input type="checkbox"/> Serum hepatitis B surface antigen<br><input type="checkbox"/> Antibodies to hepatitis B core antigen (IgG)<br><input type="checkbox"/> Antibodies to hepatitis B core antigen (IgM)<br><input type="checkbox"/> Hepatitis B surface antibody         |                                                                                                                                                                                                                                                                                                                                                                                                                                                                                                                                                                                                                                                                                                                                                                                                                                                                                                                  |                                                                                                                                                                                                                                                                                                  |                                                                                                                                                                                                                                                                                                                                                                       |
| Hepatitis C virus: <input type="checkbox"/> Hepatitis C immunoglobulin                                                                                                                                                                                                                           |                                                                                                                                                                                                                                                                                                                                                                                                                                                                                                                                                                                                                                                                                                                                                                                                                                                                                                                  |                                                                                                                                                                                                                                                                                                  |                                                                                                                                                                                                                                                                                                                                                                       |
| Hepatitis E virus: <input type="checkbox"/> Ig M                                                                                                                                                                                                                                                 |                                                                                                                                                                                                                                                                                                                                                                                                                                                                                                                                                                                                                                                                                                                                                                                                                                                                                                                  |                                                                                                                                                                                                                                                                                                  |                                                                                                                                                                                                                                                                                                                                                                       |



## Bmjopen-2021-058124\_Supplemental Material

|                                                                                                                                                                                                                    |
|--------------------------------------------------------------------------------------------------------------------------------------------------------------------------------------------------------------------|
| <input type="checkbox"/> Ig G                                                                                                                                                                                      |
| Human immunodeficiency virus: <input type="checkbox"/> HIV-1/HIV-2 antibodies/p24 test                                                                                                                             |
| SARS-COV-2: <input type="checkbox"/> Ig M<br><input type="checkbox"/> Ig G                                                                                                                                         |
| Syphilis: <input type="checkbox"/> Rapid plasma reagin<br><i>(If reactive, a FTA-ABS test will be performed)</i>                                                                                                   |
| Cytomegalovirus: <input type="checkbox"/> IgM<br><input type="checkbox"/> IgG                                                                                                                                      |
| Epstein-Barr virus: <input type="checkbox"/> IgM<br><input type="checkbox"/> IgG                                                                                                                                   |
| <b>2. SCREENING OF DONOR FECES</b>                                                                                                                                                                                 |
| <input type="checkbox"/> <i>Clostridiodes difficile</i> : Glutamate dehydrogenase (GDH) testing assay and/or toxin A and B.<br><i>(if GDH is positive, a test for toxins A and B or culture will be performed)</i> |
| <input type="checkbox"/> <i>Giardia Lamblia</i> antigen test                                                                                                                                                       |
| <input type="checkbox"/> Helicobacter Pylori antigen test                                                                                                                                                          |
| <input type="checkbox"/> Strongyloides                                                                                                                                                                             |
| <input type="checkbox"/> <i>Giardia lamblia</i>                                                                                                                                                                    |
| <input type="checkbox"/> <i>Salmonella</i> spp.                                                                                                                                                                    |
| <input type="checkbox"/> <i>Shigella</i> spp.                                                                                                                                                                      |
| <input type="checkbox"/> <i>Campylobacter</i> spp.                                                                                                                                                                 |
| <input type="checkbox"/> Enteropathogenic <i>Escherichia coli</i>                                                                                                                                                  |
| <input type="checkbox"/> <i>Yersinia</i> spp.                                                                                                                                                                      |
| <input type="checkbox"/> <i>Vibrio cholerae</i>                                                                                                                                                                    |
| <input type="checkbox"/> <i>Listeria monocytogenes</i>                                                                                                                                                             |
| <input type="checkbox"/> Blastocystis                                                                                                                                                                              |
| <input type="checkbox"/> <i>Entamoeba histolytica</i>                                                                                                                                                              |

|                                                                                                                                                                                                                                                                                                                                                                                                                         |
|-------------------------------------------------------------------------------------------------------------------------------------------------------------------------------------------------------------------------------------------------------------------------------------------------------------------------------------------------------------------------------------------------------------------------|
| <input type="checkbox"/> <i>Cryptosporidium</i>                                                                                                                                                                                                                                                                                                                                                                         |
| <input type="checkbox"/> Norovirus                                                                                                                                                                                                                                                                                                                                                                                      |
| <input type="checkbox"/> Adenovirus                                                                                                                                                                                                                                                                                                                                                                                     |
| <input type="checkbox"/> Rotavirus                                                                                                                                                                                                                                                                                                                                                                                      |
| <input type="checkbox"/> Ova and parasite test                                                                                                                                                                                                                                                                                                                                                                          |
| Multidrug-resistant bacteria: <ul style="list-style-type: none"><li><input type="checkbox"/> Extended-spectrum beta-lactamase-producing <i>Enterobacterales</i></li><li><input type="checkbox"/> Carbapenemase-producing <i>Enterobacterales</i></li><li><input type="checkbox"/> Vancomycin-resistant <i>Enterococci</i></li><li><input type="checkbox"/> Methicillin-resistant <i>Staphylococcus aureus</i></li></ul> |
| <input type="checkbox"/> Fecal occult blood test                                                                                                                                                                                                                                                                                                                                                                        |
| <input type="checkbox"/> Fecal calprotectin                                                                                                                                                                                                                                                                                                                                                                             |
| <b>3. NASOPHARINGEAL SCREENING FOR SARS-CoV2/COVID-19</b>                                                                                                                                                                                                                                                                                                                                                               |
